# Supplementary material for: Integration of expert knowledge in the definition of Swiss pear core collection
Source: PubMed Central journal article supplement (PMC6586639; doi:10.1038/s41598-019-44871-3), 2019-06-20
Supplement: 41598_2019_44871_MOESM1_ESM.pdf [file 41598_2019_44871_MOESM1_ESM.pdf]

## **SUPPLEMENTARY INFORMATION**

### **Integration of expert knowledge in the definition of Swiss pear core collection**

**Urrestarazu J<sup>1\*</sup>, Kägi C<sup>2\*</sup>, Bühlmann A<sup>3</sup>, Gassmann J<sup>3</sup>, Santesteban LG<sup>1</sup>, Frey JE<sup>3</sup>, Kellerhals M<sup>3</sup>, and Miranda C<sup>1</sup>**

\*These authors contributed equally to this work

Corresponding author: Jorge Urrestarazu ([jorge.urrestarazu@unavarra.es](mailto:jorge.urrestarazu@unavarra.es))  
Department of Agronomy, Biotechnology and Food Science, Public University of Navarre, 31006 Pamplona, Spain. Phone number: +34 948169127

<sup>1</sup> Department of Agronomy, Biotechnology and Food Science, Public University of Navarre, 31006 Pamplona, Spain.

<sup>2</sup> Federal Office for Agriculture, 3003 Bern, Switzerland.

<sup>3</sup> Agroscope, 8820 Wädenswil, Switzerland.

**Supplementary Table S1.** List of 1198 accessions analyzed in this study classified according to their duplicated group (SSR profile). The probability of assignment for each genotype to the genetic groups inferred with STRUCTURE is provided.

| Accession name           | Accession code | Location           | Gene group | Group | qI max | Subgroup | qI max nested | qI G1 | qI G2 | qI G1.1 | qI G1.2 | qI G2.1 | qI G2.2 |
|--------------------------|----------------|--------------------|------------|-------|--------|----------|---------------|-------|-------|---------|---------|---------|---------|
| Zuckerbirne              | 14-003-973     | Büron              | 1          | G1    | 0.972  | G1.2     | 0.972         | 0.972 | 0.028 | 0.037   | 0.963   | --      | --      |
| Zuckerbirli              | 14-003-950     | Büron              | 1          | G1    | 0.972  | G1.2     | 0.972         | 0.972 | 0.028 | 0.037   | 0.963   | --      | --      |
| Poire d'Adge             | 14-003-2514    | Aubonne            | 2          | G2    | 0.693  | G2.1     | 0.693         | 0.307 | 0.693 | --      | --      | 0.517   | 0.483   |
| Poire Beurré d'Adze      | 14-003-49      | Pierre-à-bot       | 2          | G2    | 0.693  | G2.1     | 0.693         | 0.307 | 0.693 | --      | --      | 0.517   | 0.483   |
| Brühlmanns Butterbirne   | 14-003-85      | Pierre-à-bot       | 3          | G2    | 0.932  | G2.1     | 0.932         | 0.068 | 0.932 | --      | --      | 0.692   | 0.308   |
| unknown                  | 14-003-1471    | Büron              | 3          | G2    | 0.932  | G2.1     | 0.932         | 0.068 | 0.932 | --      | --      | 0.692   | 0.308   |
| Poire Chretien           | 14-003-121     | Pierre-à-bot       | 4          | G2    | 0.975  | G2.1     | 0.975         | 0.025 | 0.975 | --      | --      | 0.682   | 0.318   |
| Poire Chrétien           | 14-003-122     | Pierre-à-bot       | 4          | G2    | 0.975  | G2.1     | 0.975         | 0.025 | 0.975 | --      | --      | 0.682   | 0.318   |
| Poire Froment            | 14-003-222     | Pierre-à-bot       | 5          | G2    | 0.738  | G2.1     | 0.892         | 0.262 | 0.738 | --      | --      | 0.892   | 0.108   |
| Poire Golliatson         | 14-003-1127    | Pierre-à-bot       | 5          | G2    | 0.738  | G2.1     | 0.892         | 0.262 | 0.738 | --      | --      | 0.892   | 0.108   |
| Poire Volléja            | 14-003-650     | Pierre-à-bot       | 6          | G1    | 0.579  | G1.2     | 0.935         | 0.579 | 0.421 | 0.065   | 0.935   | --      | --      |
| Poire Vouéza             | 14-003-2540    | Pierre-à-bot       | 6          | G1    | 0.579  | G1.2     | 0.935         | 0.579 | 0.421 | 0.065   | 0.935   | --      | --      |
| Bratbirne                | 14-003-806     | Büron              | 7          | G2    | 0.947  | G2.1     | 0.947         | 0.053 | 0.947 | --      | --      | 0.721   | 0.279   |
| Bratbirne                | 14-003-812     | Büron              | 7          | G2    | 0.947  | G2.1     | 0.947         | 0.053 | 0.947 | --      | --      | 0.721   | 0.279   |
| Spitzlibirne             | 14-003-930     | Büron              | 8          | G2    | 0.880  | G2.2     | 0.880         | 0.120 | 0.880 | --      | --      | 0.211   | 0.789   |
| Egnacher Spitzbirne      | 14-003-180     | Bözberg-Vierlinden | 8          | G2    | 0.880  | G2.2     | 0.880         | 0.120 | 0.880 | --      | --      | 0.211   | 0.789   |
| unknown                  | 14-003-1479    | Büron              | 9          | G2    | 0.963  | G2.2     | 0.963         | 0.037 | 0.963 | --      | --      | 0.181   | 0.819   |
| Herrenbirne              | 14-003-991     | Büron              | 9          | G2    | 0.963  | G2.2     | 0.963         | 0.037 | 0.963 | --      | --      | 0.181   | 0.819   |
| Petite Roussette         | 14-003-1548    | Aclens             | 10         | G2    | 0.618  | G2.2     | 0.654         | 0.382 | 0.618 | --      | --      | 0.346   | 0.654   |
| Poire rouge              | 14-003-1503    | Aclens             | 10         | G2    | 0.618  | G2.2     | 0.654         | 0.382 | 0.618 | --      | --      | 0.346   | 0.654   |
| Poire Rouselette         | 14-003-1549    | Aclens             | 10         | G2    | 0.618  | G2.2     | 0.654         | 0.382 | 0.618 | --      | --      | 0.346   | 0.654   |
| Maseron                  | 14-003-868     | Büron              | 11         | G2    | 0.937  | G2.1     | 0.937         | 0.063 | 0.937 | --      | --      | 0.929   | 0.071   |
| Rebenbirne               | 14-003-869     | Büron              | 11         | G2    | 0.937  | G2.1     | 0.937         | 0.063 | 0.937 | --      | --      | 0.929   | 0.071   |
| Vincy 5                  | 14-003-2518    | Aubonne            | 12         | G1    | 0.911  | G1.2     | 0.911         | 0.911 | 0.089 | 0.474   | 0.526   | --      | --      |
| unknown                  | 14-003-1501    | Büron              | 12         | G1    | 0.911  | G1.2     | 0.911         | 0.911 | 0.089 | 0.474   | 0.526   | --      | --      |
| Wintertrübler            | 14-003-900     | Büron              | 13         | G1    | 0.967  | G1.1     | 0.967         | 0.967 | 0.033 | 0.873   | 0.127   | --      | --      |
| Poire à rissoles Marlioz | 14-003-471     | Aubonne            | 14         | G2    | 0.778  | G2.1     | 0.778         | 0.222 | 0.778 | --      | --      | 0.605   | 0.395   |
| Poire Rissole            | 14-003-1570    | Aclens             | 14         | G2    | 0.778  | G2.1     | 0.778         | 0.222 | 0.778 | --      | --      | 0.605   | 0.395   |
| Poire à Rissole I        | 14-003-1155    | Aclens             | 14         | G2    | 0.778  | G2.1     | 0.778         | 0.222 | 0.778 | --      | --      | 0.605   | 0.395   |
| Poire à Rissole II       | 14-003-1156    | Aclens             | 14         | G2    | 0.778  | G2.1     | 0.778         | 0.222 | 0.778 | --      | --      | 0.605   | 0.395   |
| Poire à Rissole          | 14-003-506     | Pierre-à-bot       | 14         | G2    | 0.778  | G2.1     | 0.778         | 0.222 | 0.778 | --      | --      | 0.605   | 0.395   |
| Luzeiner Längler         | 14-003-376     | Roggwil Hofen      | 15         | G2    | 0.968  | G2.1     | 0.968         | 0.032 | 0.968 | --      | --      | 0.955   | 0.045   |
| Luzeiner Längler         | 14-003-376     | Aubonne            | 15         | G2    | 0.968  | G2.1     | 0.968         | 0.032 | 0.968 | --      | --      | 0.955   | 0.045   |
| Luzeiner Längler         | 14-003-376     | Aclens             | 15         | G2    | 0.968  | G2.1     | 0.968         | 0.032 | 0.968 | --      | --      | 0.955   | 0.045   |
| Bündtbirne               | 14-003-843     | Büron              | 15         | G2    | 0.968  | G2.1     | 0.968         | 0.032 | 0.968 | --      | --      | 0.955   | 0.045   |
| Luzeiner Dörrbirne       | 14-003-908     | Büron              | 15         | G2    | 0.968  | G2.1     | 0.968         | 0.032 | 0.968 | --      | --      | 0.955   | 0.045   |
| Teigbirne                | 14-003-619     | Aubonne            | 16         | G2    | 0.688  | G2.1     | 0.723         | 0.312 | 0.688 | --      | --      | 0.723   | 0.277   |
| Gris Chollet             | 14-003-261     | Aclens             | 16         | G2    | 0.688  | G2.1     | 0.723         | 0.312 | 0.688 | --      | --      | 0.723   | 0.277   |
| Poire Blanc              | 14-003-1140    | Aclens             | 16         | G2    | 0.688  | G2.1     | 0.723         | 0.312 | 0.688 | --      | --      | 0.723   | 0.277   |
| Poire Blanc              | 14-003-1537    | Aclens             | 16         | G2    | 0.688  | G2.1     | 0.723         | 0.312 | 0.688 | --      | --      | 0.723   | 0.277   |
| Poire Gris               | 14-003-1149    | Aclens             | 16         | G2    | 0.688  | G2.1     | 0.723         | 0.312 | 0.688 | --      | --      | 0.723   | 0.277   |
| Poire Blanc              | 14-003-1115    | Pierre-à-bot       | 16         | G2    | 0.688  | G2.1     | 0.723         | 0.312 | 0.688 | --      | --      | 0.723   | 0.277   |
| Poire Blanc              | 14-003-1116    | Pierre-à-bot       | 16         | G2    | 0.688  | G2.1     | 0.723         | 0.312 | 0.688 | --      | --      | 0.723   | 0.277   |
| Poire Gris               | 14-003-263     | Pierre-à-bot       | 16         | G2    | 0.688  | G2.1     | 0.723         | 0.312 | 0.688 | --      | --      | 0.723   | 0.277   |
| Graubirne                | 14-003-1235    | Büron              | 16         | G2    | 0.688  | G2.1     | 0.723         | 0.312 | 0.688 | --      | --      | 0.723   | 0.277   |
| Poire gris               | 14-003-1514    | Büron              | 16         | G2    | 0.688  | G2.1     | 0.723         | 0.312 | 0.688 | --      | --      | 0.723   | 0.277   |
| Spalierbirne             | 14-003-917     | Büron              | 17         | G2    | 0.978  | G2.1     | 0.978         | 0.022 | 0.978 | --      | --      | 0.756   | 0.244   |
| Wildling von Sargans     | 14-003-672     | Knonau             | 17         | G2    | 0.978  | G2.1     | 0.978         | 0.022 | 0.978 | --      | --      | 0.756   | 0.244   |
| Uelibirne                | 14-003-1016    | Büron              | 18         | G2    | 0.960  | G2.1     | 0.960         | 0.040 | 0.960 | --      | --      | 0.516   | 0.484   |
| Uelibirne                | 14-003-636     | Knonau             | 18         | G2    | 0.960  | G2.1     | 0.960         | 0.040 | 0.960 | --      | --      | 0.516   | 0.484   |
| Julieierbirne            | 14-003-948     | Baden              | 19         | G1    | 0.528  | G1.2     | 0.964         | 0.528 | 0.472 | 0.036   | 0.964   | --      | --      |
| Butterbirne              | 14-003-997     | Büron              | 19         | G1    | 0.528  | G1.2     | 0.964         | 0.528 | 0.472 | 0.036   | 0.964   | --      | --      |
| Unspunnen                | 14-003-999     | Büron              | 19         | G1    | 0.528  | G1.2     | 0.964         | 0.528 | 0.472 | 0.036   | 0.964   | --      | --      |
| unknown                  | 14-003-876     | Büron              | 20         | G1    | 0.948  | G1.1     | 0.968         | 0.948 | 0.052 | 0.968   | 0.032   | --      | --      |
| Doyenne du Comice        | Reference 3    | Uni Reading        | 20         | G1    | 0.948  | G1.1     | 0.968         | 0.948 | 0.052 | 0.968   | 0.032   | --      | --      |
| Poire Eyrepire           | 14-003-2532    | Pierre-à-bot       | 21         | G2    | 0.881  | G2.1     | 0.881         | 0.119 | 0.881 | --      | --      | 0.757   | 0.243   |
| Poire d' Oeuf            | 14-003-1131    | Pierre-à-bot       | 21         | G2    | 0.881  | G2.1     | 0.881         | 0.119 | 0.881 | --      | --      | 0.757   | 0.243   |
| unknown                  | 14-003-1576    | Büron              | 21         | G2    | 0.881  | G2.1     | 0.881         | 0.119 | 0.881 | --      | --      | 0.757   | 0.243   |
| unknown                  | 14-003-1436    | Büron              | 22         | G2    | 0.967  | G2.2     | 0.967         | 0.033 | 0.967 | --      | --      | 0.109   | 0.891   |
| Heubirli                 | 14-003-919     | Büron              | 22         | G2    | 0.967  | G2.2     | 0.967         | 0.033 | 0.967 | --      | --      | 0.109   | 0.891   |
| Stadelbirne              | 14-003-714     | Baden              | 23         | G2    | 0.974  | G2.2     | 0.974         | 0.026 | 0.974 | --      | --      | 0.475   | 0.525   |
| Chrisibira               | 14-003-1011    | Baden              | 23         | G2    | 0.974  | G2.2     | 0.974         | 0.026 | 0.974 | --      | --      | 0.475   | 0.525   |
| Traubenbirne             | 14-003-1484    | Büron              | 23         | G2    | 0.974  | G2.2     | 0.974         | 0.026 | 0.974 | --      | --      | 0.475   | 0.525   |
| unknown                  | 14-003-1037    | Büron              | 24         | G2    | 0.967  | G2.1     | 0.967         | 0.033 | 0.967 | --      | --      | 0.594   | 0.406   |
| Dornbirne                | 14-003-3750    | Büron              | 24         | G2    | 0.967  | G2.1     | 0.967         | 0.033 | 0.967 | --      | --      | 0.594   | 0.406   |
| Hornusser                | 14-003-861     | Büron              | 25         | G2    | 0.984  | G2.2     | 0.984         | 0.016 | 0.984 | --      | --      | 0.167   | 0.833   |
| Längler                  | 14-003-787     | Büron              | 25         | G2    | 0.984  | G2.2     | 0.984         | 0.016 | 0.984 | --      | --      | 0.167   | 0.833   |
| Hornuser                 | 14-003-766     | Büron              | 25         | G2    | 0.984  | G2.2     | 0.984         | 0.016 | 0.984 | --      | --      | 0.167   | 0.833   |
| Winterbirne              | 14-003-727     | Büron              | 26         | G1    | 0.923  | G1.2     | 0.923         | 0.923 | 0.077 | 0.400   | 0.600   | --      | --      |
| Poires à Botzi           | 14-003-1525    | Büron              | 26         | G1    | 0.923  | G1.2     | 0.923         | 0.923 | 0.077 | 0.400   | 0.600   | --      | --      |
| Poire Pouéta Pe          | 14-003-2530    | Pierre-à-bot       | 27         | G2    | 0.863  | G2.2     | 0.863         | 0.137 | 0.863 | --      | --      | 0.401   | 0.599   |
| Poire Pouta-pi x tapis   | 14-003-1541    | Pierre-à-bot       | 27         | G2    | 0.863  | G2.2     | 0.863         | 0.137 | 0.863 | --      | --      | 0.401   | 0.599   |
| unknown                  | 14-003-1438    | Büron              | 28         | G1    | 0.947  | G1.1     | 0.947         | 0.947 | 0.053 | 0.913   | 0.087   | --      | --      |
| Marie-Luise              | 14-003-1420    | Büron              | 28         | G1    | 0.947  | G1.1     | 0.947         | 0.947 | 0.053 | 0.913   | 0.087   | --      | --      |
| Poire Culotte suisse     | 14-003-1122    | Pierre-à-bot       | 29         | G1    | 0.915  | G1.1     | 0.915         | 0.915 | 0.085 | 0.773   | 0.227   | --      | --      |
| Schweizerhosen           | 14-003-753     | Büron              | 29         | G1    | 0.915  | G1.1     | 0.915         | 0.915 | 0.085 | 0.773   | 0.227   | --      | --      |
| Häuffler                 | 14-003-1066    | Roggwil Riedern    | 30         | G2    | 0.830  | G2.1     | 0.830         | 0.170 | 0.830 | --      | --      | 0.548   | 0.452   |
| Stuckbirne               | 14-003-1045    | Baden              | 30         | G2    | 0.830  | G2.1     | 0.830         | 0.170 | 0.830 | --      | --      | 0.548   | 0.452   |
| Häuffler                 | 14-003-292     | Knonau             | 30         | G2    | 0.830  | G2.1     | 0.830         | 0.170 | 0.830 | --      | --      | 0.548   | 0.452   |
| Dallen-Birne             | 14-003-1392    | Roggwil Riedern    | 31         | G2    | 0.936  | G2.2     | 0.936         | 0.064 | 0.936 | --      | --      | 0.344   | 0.656   |
| Platzbirne               | 14-003-1409    | Roggwil Riedern    | 31         | G2    | 0.936  | G2.2     | 0.936         | 0.064 | 0.936 | --      | --      | 0.344   | 0.656   |
| Poire Barbeyron          | 14-003-26      | Aubonne            | 32         | G1    | 0.630  | G1.2     | 0.970         | 0.630 | 0.370 | 0.030   | 0.970   | --      | --      |
| Poire Barbeyron          | 14-003-26      | Pierre-à-bot       | 32         | G1    | 0.630  | G1.2     | 0.970         | 0.630 | 0.370 | 0.030   | 0.970   | --      | --      |
| Poire de Fer             | 14-003-1147    | Aclens             | 33         | G2    | 0.915  | G2.1     | 0.915         | 0.085 | 0.915 | --      | --      | 0.503   | 0.497   |

|                                |             |                 |    |    |       |      |       |       |       |       |       |       |       |
|--------------------------------|-------------|-----------------|----|----|-------|------|-------|-------|-------|-------|-------|-------|-------|
| Chlöpfer                       | 14-003-1031 | Baden           | 33 | G2 | 0.915 | G2.1 | 0.915 | 0.085 | 0.915 | --    | --    | 0.503 | 0.497 |
| Wyy Birne / Weinbirne          | 14-003-1458 | Baden           | 33 | G2 | 0.915 | G2.1 | 0.915 | 0.085 | 0.915 | --    | --    | 0.503 | 0.497 |
| Martin                         | 14-003-1561 | Aclens          | 34 | G1 | 0.548 | G1.2 | 0.966 | 0.548 | 0.452 | 0.034 | 0.966 | --    | --    |
| Poire Saint-Martin             | 14-003-1159 | Aclens          | 34 | G1 | 0.548 | G1.2 | 0.966 | 0.548 | 0.452 | 0.034 | 0.966 | --    | --    |
| Poire de Fer                   | 14-003-199  | Pierre-à-bot    | 34 | G1 | 0.548 | G1.2 | 0.966 | 0.548 | 0.452 | 0.034 | 0.966 | --    | --    |
| Poire Quieuchet                | 14-003-485  | Pierre-à-bot    | 34 | G1 | 0.548 | G1.2 | 0.966 | 0.548 | 0.452 | 0.034 | 0.966 | --    | --    |
| Poire Saint-Martin             | 14-003-544  | Pierre-à-bot    | 34 | G1 | 0.548 | G1.2 | 0.966 | 0.548 | 0.452 | 0.034 | 0.966 | --    | --    |
| Poire Cent-Grappes rouge       | 14-003-108  | Pierre-à-bot    | 35 | G1 | 0.737 | G1.2 | 0.754 | 0.737 | 0.263 | 0.246 | 0.754 | --    | --    |
| unknown                        | 14-003-1474 | Büron           | 35 | G1 | 0.737 | G1.2 | 0.754 | 0.737 | 0.263 | 0.246 | 0.754 | --    | --    |
| Gränggeli                      | 14-003-1424 | Baden           | 36 | G2 | 0.789 | G2.2 | 0.789 | 0.211 | 0.789 | --    | --    | 0.303 | 0.697 |
| Grängeli                       | 14-003-336  | Knonau          | 36 | G2 | 0.789 | G2.2 | 0.789 | 0.211 | 0.789 | --    | --    | 0.303 | 0.697 |
| Nidwaldner Weissbirne          | 14-003-710  | Baden           | 37 | G2 | 0.800 | G2.1 | 0.800 | 0.200 | 0.800 | --    | --    | 0.585 | 0.415 |
| Lehnbirne                      | 14-003-704  | Baden           | 37 | G2 | 0.800 | G2.1 | 0.800 | 0.200 | 0.800 | --    | --    | 0.585 | 0.415 |
| Süssbirli                      | 14-003-1413 | Büron           | 38 | G2 | 0.664 | G2.2 | 0.770 | 0.336 | 0.664 | --    | --    | 0.230 | 0.770 |
| Büschelbirli                   | 14-003-1412 | Büron           | 38 | G2 | 0.664 | G2.2 | 0.770 | 0.336 | 0.664 | --    | --    | 0.230 | 0.770 |
| Pero Breno                     | 14-003-2574 | Manno           | 39 | G1 | 0.569 | G1.2 | 0.883 | 0.569 | 0.431 | 0.117 | 0.883 | --    | --    |
| Pér бүтэр                      | 14-003-2580 | Manno           | 39 | G1 | 0.569 | G1.2 | 0.883 | 0.569 | 0.431 | 0.117 | 0.883 | --    | --    |
| Sonnenbirne                    | 14-003-1337 | Koppigen        | 40 | G2 | 0.935 | G2.1 | 0.948 | 0.065 | 0.935 | --    | --    | 0.948 | 0.052 |
| unknown                        | 14-003-1223 | Koppigen        | 40 | G2 | 0.935 | G2.1 | 0.948 | 0.065 | 0.935 | --    | --    | 0.948 | 0.052 |
| Poire Bellexime                | 14-003-40   | Pierre-à-bot    | 41 | G1 | 0.596 | G1.2 | 0.894 | 0.596 | 0.404 | 0.106 | 0.894 | --    | --    |
| Poire Cuisse-Dame              | 14-003-155  | Pierre-à-bot    | 41 | G1 | 0.596 | G1.2 | 0.894 | 0.596 | 0.404 | 0.106 | 0.894 | --    | --    |
| Poire Monsieur                 | 14-003-414  | Pierre-à-bot    | 41 | G1 | 0.596 | G1.2 | 0.894 | 0.596 | 0.404 | 0.106 | 0.894 | --    | --    |
| Poire Tabatière                | 14-003-616  | Pierre-à-bot    | 41 | G1 | 0.596 | G1.2 | 0.894 | 0.596 | 0.404 | 0.106 | 0.894 | --    | --    |
| Nägeli                         | 14-003-1053 | Büron           | 41 | G1 | 0.596 | G1.2 | 0.894 | 0.596 | 0.404 | 0.106 | 0.894 | --    | --    |
| Nägelibirne                    | 14-003-427  | Dürrenäsch      | 41 | G1 | 0.596 | G1.2 | 0.894 | 0.596 | 0.404 | 0.106 | 0.894 | --    | --    |
| Poire Socratte                 | 14-003-577  | Pierre-à-bot    | 42 | G2 | 0.871 | G2.2 | 0.871 | 0.129 | 0.871 | --    | --    | 0.319 | 0.681 |
| Poire à Soupe                  | 14-003-1135 | Pierre-à-bot    | 42 | G2 | 0.871 | G2.2 | 0.871 | 0.129 | 0.871 | --    | --    | 0.319 | 0.681 |
| Sconosciuto prob. locale       | 14-003-2585 | Manno           | 43 | G1 | 0.508 | G1.2 | 0.912 | 0.508 | 0.492 | 0.088 | 0.912 | --    | --    |
| Pér de Sant'Ana                | 14-003-2589 | Manno           | 43 | G1 | 0.508 | G1.2 | 0.912 | 0.508 | 0.492 | 0.088 | 0.912 | --    | --    |
| Züribirä                       | 14-003-982  | Büron           | 44 | G1 | 0.975 | G1.1 | 0.975 | 0.975 | 0.025 | 0.737 | 0.263 | --    | --    |
| Wieserbirne                    | 14-003-303  | Büron           | 44 | G1 | 0.975 | G1.1 | 0.975 | 0.975 | 0.025 | 0.737 | 0.263 | --    | --    |
| Schweizerhose                  | 14-003-988  | Roggwil Riedern | 45 | G2 | 0.958 | G2.1 | 0.958 | 0.042 | 0.958 | --    | --    | 0.956 | 0.044 |
| unknown                        | 14-003-1364 | Koppigen        | 45 | G2 | 0.958 | G2.1 | 0.958 | 0.042 | 0.958 | --    | --    | 0.956 | 0.044 |
| Sunnebire                      | 14-003-933  | Büron           | 45 | G2 | 0.958 | G2.1 | 0.958 | 0.042 | 0.958 | --    | --    | 0.956 | 0.044 |
| Schwyzehose                    | 14-003-995  | Büron           | 45 | G2 | 0.958 | G2.1 | 0.958 | 0.042 | 0.958 | --    | --    | 0.956 | 0.044 |
| Längler                        | 14-003-355  | Roggwil Riedern | 46 | G2 | 0.966 | G2.1 | 0.966 | 0.034 | 0.966 | --    | --    | 0.941 | 0.059 |
| Wadelbirne                     | 14-003-651  | Aclens          | 46 | G2 | 0.966 | G2.1 | 0.966 | 0.034 | 0.966 | --    | --    | 0.941 | 0.059 |
| Poire Cannepire                | 14-003-101  | Pierre-à-bot    | 46 | G2 | 0.966 | G2.1 | 0.966 | 0.034 | 0.966 | --    | --    | 0.941 | 0.059 |
| Poire Jaune Codia              | 14-003-129  | Pierre-à-bot    | 46 | G2 | 0.966 | G2.1 | 0.966 | 0.034 | 0.966 | --    | --    | 0.941 | 0.059 |
| Poire Coiède                   | 14-003-130  | Pierre-à-bot    | 46 | G2 | 0.966 | G2.1 | 0.966 | 0.034 | 0.966 | --    | --    | 0.941 | 0.059 |
| Poire Colliard                 | 14-003-134  | Pierre-à-bot    | 46 | G2 | 0.966 | G2.1 | 0.966 | 0.034 | 0.966 | --    | --    | 0.941 | 0.059 |
| Poire à Golliard               | 14-003-249  | Pierre-à-bot    | 46 | G2 | 0.966 | G2.1 | 0.966 | 0.034 | 0.966 | --    | --    | 0.941 | 0.059 |
| Comtesse de Paris              | 14-003-136  | Roggwil Hofen   | 47 | G1 | 0.844 | G1.2 | 0.844 | 0.844 | 0.156 | 0.256 | 0.744 | --    | --    |
| Comtesse de Paris              | 14-003-136  | Pierre-à-bot    | 47 | G1 | 0.844 | G1.2 | 0.844 | 0.844 | 0.156 | 0.256 | 0.744 | --    | --    |
| Affelträngler                  | 14-003-6    | Roggwil Hofen   | 48 | G2 | 0.812 | G2.2 | 0.849 | 0.188 | 0.812 | --    | --    | 0.151 | 0.849 |
| Bändlibirne                    | 14-003-1051 | Baden           | 48 | G2 | 0.812 | G2.2 | 0.849 | 0.188 | 0.812 | --    | --    | 0.151 | 0.849 |
| Ryschacherbirne                | 14-003-1065 | Baden           | 48 | G2 | 0.812 | G2.2 | 0.849 | 0.188 | 0.812 | --    | --    | 0.151 | 0.849 |
| kleine Birli                   | 14-003-1018 | Baden           | 48 | G2 | 0.812 | G2.2 | 0.849 | 0.188 | 0.812 | --    | --    | 0.151 | 0.849 |
| Affelträngler                  | 14-003-6    | Baden           | 48 | G2 | 0.812 | G2.2 | 0.849 | 0.188 | 0.812 | --    | --    | 0.151 | 0.849 |
| Affeltranger                   | 14-003-1069 | Büron           | 48 | G2 | 0.812 | G2.2 | 0.849 | 0.188 | 0.812 | --    | --    | 0.151 | 0.849 |
| Trischeläbere                  | 14-003-763  | Roggwil Hofen   | 49 | G2 | 0.863 | G2.1 | 0.863 | 0.137 | 0.863 | --    | --    | 0.694 | 0.306 |
| Mokholzbirne                   | 14-003-763  | Büron           | 49 | G2 | 0.863 | G2.1 | 0.863 | 0.137 | 0.863 | --    | --    | 0.694 | 0.306 |
| Goldschmeckler                 | 14-003-253  | Roggwil Hofen   | 50 | G2 | 0.984 | G2.2 | 0.984 | 0.016 | 0.984 | --    | --    | 0.355 | 0.645 |
| Bergbirne                      | 14-003-664  | Baden           | 50 | G2 | 0.984 | G2.2 | 0.984 | 0.016 | 0.984 | --    | --    | 0.355 | 0.645 |
| Bergbirne                      | 14-003-914  | Büron           | 50 | G2 | 0.984 | G2.2 | 0.984 | 0.016 | 0.984 | --    | --    | 0.355 | 0.645 |
| Späte Weinbirne                | 14-003-805  | Büron           | 50 | G2 | 0.984 | G2.2 | 0.984 | 0.016 | 0.984 | --    | --    | 0.355 | 0.645 |
| Aeschmer Holzbirne             | 14-003-5    | Knonau          | 50 | G2 | 0.984 | G2.2 | 0.984 | 0.016 | 0.984 | --    | --    | 0.355 | 0.645 |
| Lätterbirne                    | 14-003-358  | Roggwil Hofen   | 51 | G2 | 0.939 | G2.1 | 0.939 | 0.061 | 0.939 | --    | --    | 0.749 | 0.251 |
| Stuttgarter Weinbirne          | 14-003-765  | Büron           | 51 | G2 | 0.939 | G2.1 | 0.939 | 0.061 | 0.939 | --    | --    | 0.749 | 0.251 |
| Schellerbirne                  | 14-003-554  | Aubonne         | 52 | G2 | 0.716 | G2.2 | 0.856 | 0.284 | 0.716 | --    | --    | 0.144 | 0.856 |
| Poire Bataillard               | 14-003-33   | Pierre-à-bot    | 52 | G2 | 0.716 | G2.2 | 0.856 | 0.284 | 0.716 | --    | --    | 0.144 | 0.856 |
| Cuisinière                     | 14-003-1553 | Pierre-à-bot    | 52 | G2 | 0.716 | G2.2 | 0.856 | 0.284 | 0.716 | --    | --    | 0.144 | 0.856 |
| Poire Gaucher                  | 14-003-232  | Pierre-à-bot    | 52 | G2 | 0.716 | G2.2 | 0.856 | 0.284 | 0.716 | --    | --    | 0.144 | 0.856 |
| Poire Caillin                  | 14-003-95   | Pierre-à-bot    | 53 | G2 | 0.894 | G2.2 | 0.894 | 0.106 | 0.894 | --    | --    | 0.266 | 0.734 |
| unknown                        | 14-003-1447 | Baden           | 53 | G2 | 0.894 | G2.2 | 0.894 | 0.106 | 0.894 | --    | --    | 0.266 | 0.734 |
| Büschelbirä                    | 14-003-1446 | Baden           | 54 | G1 | 0.939 | G1.2 | 0.939 | 0.939 | 0.061 | 0.483 | 0.517 | --    | --    |
| Winterrousselle                | 14-003-975  | Büron           | 54 | G1 | 0.939 | G1.2 | 0.939 | 0.939 | 0.061 | 0.483 | 0.517 | --    | --    |
| Büschelbirne                   | 14-003-915  | Büron           | 54 | G1 | 0.939 | G1.2 | 0.939 | 0.939 | 0.061 | 0.483 | 0.517 | --    | --    |
| Basler Birli                   | 14-003-1025 | Büron           | 55 | G2 | 0.979 | G2.1 | 0.979 | 0.021 | 0.979 | --    | --    | 0.513 | 0.487 |
| unknown                        | 14-003-1482 | Büron           | 55 | G2 | 0.979 | G2.1 | 0.979 | 0.021 | 0.979 | --    | --    | 0.513 | 0.487 |
| Pero Lopagno                   | 14-003-2575 | Manno           | 56 | G1 | 0.936 | G1.1 | 0.936 | 0.936 | 0.064 | 0.722 | 0.278 | --    | --    |
| Per buter Bioggio              | 14-003-2695 | Manno           | 56 | G1 | 0.936 | G1.1 | 0.936 | 0.936 | 0.064 | 0.722 | 0.278 | --    | --    |
| Pere farineuse / Pere grandi   | 14-003-1506 | Roggwil Riedern | 56 | G1 | 0.936 | G1.1 | 0.936 | 0.936 | 0.064 | 0.722 | 0.278 | --    | --    |
| Pero Decana (lato nord)        | 14-003-2736 | Manno           | 57 | G1 | 0.941 | G1.1 | 0.941 | 0.941 | 0.059 | 0.879 | 0.121 | --    | --    |
| Butterbirne                    | 14-003-1302 | Büron           | 57 | G1 | 0.941 | G1.1 | 0.941 | 0.941 | 0.059 | 0.879 | 0.121 | --    | --    |
| Pero Decana (lato sud)         | 14-003-2735 | Manno           | 58 | G1 | 0.560 | G1.1 | 0.672 | 0.560 | 0.440 | 0.672 | 0.328 | --    | --    |
| Deutsche National Bergamotte   | 14-003-165  | Roggwil Hofen   | 58 | G1 | 0.560 | G1.1 | 0.672 | 0.560 | 0.440 | 0.672 | 0.328 | --    | --    |
| Bergamotte                     | 14-003-1425 | Baden           | 58 | G1 | 0.560 | G1.1 | 0.672 | 0.560 | 0.440 | 0.672 | 0.328 | --    | --    |
| Tellerbirne                    | 14-003-722  | Baden           | 58 | G1 | 0.560 | G1.1 | 0.672 | 0.560 | 0.440 | 0.672 | 0.328 | --    | --    |
| Glockenbirne                   | 14-003-752  | Baden           | 58 | G1 | 0.560 | G1.1 | 0.672 | 0.560 | 0.440 | 0.672 | 0.328 | --    | --    |
| unknown / Wettinger Holzbirne  | 14-003-1402 | Roggwil Riedern | 59 | G2 | 0.952 | G2.2 | 0.952 | 0.048 | 0.952 | --    | --    | 0.390 | 0.610 |
| Muggenbirne                    | 14-003-905  | Büron           | 59 | G2 | 0.952 | G2.2 | 0.952 | 0.048 | 0.952 | --    | --    | 0.390 | 0.610 |
| Schiblerbirne                  | 14-003-922  | Büron           | 59 | G2 | 0.952 | G2.2 | 0.952 | 0.048 | 0.952 | --    | --    | 0.390 | 0.610 |
| Biessenhofer Mostbirne         | 14-003-58   | Büron           | 59 | G2 | 0.952 | G2.2 | 0.952 | 0.048 | 0.952 | --    | --    | 0.390 | 0.610 |
| Ballaigui                      | 14-003-24   | Aubonne         | 60 | G1 | 0.593 | G1.1 | 0.593 | 0.593 | 0.407 | 0.546 | 0.454 | --    | --    |
| Poire Bergamotte de Ballaigues | 14-003-1137 | Pierre-à-bot    | 60 | G1 | 0.593 | G1.1 | 0.593 | 0.593 | 0.407 | 0.546 | 0.454 | --    | --    |
| Poire Demi-Goillard            | 14-003-162  | Pierre-à-bot    | 60 | G1 | 0.593 | G1.1 | 0.593 | 0.593 | 0.407 | 0.546 | 0.454 | --    | --    |

|                                   |             |                 |      |    |       |      |       |       |       |       |       |       |       |
|-----------------------------------|-------------|-----------------|------|----|-------|------|-------|-------|-------|-------|-------|-------|-------|
| Gros brun                         | 14-003-2513 | Aubonne         | 61   | G1 | 0.594 | G1.2 | 0.694 | 0.594 | 0.406 | 0.306 | 0.694 | --    | --    |
| Poire-Livre                       | 14-003-1129 | Pierre-à-bot    | 61   | G1 | 0.594 | G1.2 | 0.694 | 0.594 | 0.406 | 0.306 | 0.694 | --    | --    |
| Poire Vouarding                   | 14-003-1136 | Pierre-à-bot    | 61   | G1 | 0.594 | G1.2 | 0.694 | 0.594 | 0.406 | 0.306 | 0.694 | --    | --    |
| Poire Fondante des Bois           | 14-003-214  | Pierre-à-bot    | 62   | G1 | 0.982 | G1.1 | 0.982 | 0.982 | 0.018 | 0.944 | 0.056 | --    | --    |
| Winterbirne                       | 14-003-1492 | Büron           | 62   | G1 | 0.982 | G1.1 | 0.982 | 0.982 | 0.018 | 0.944 | 0.056 | --    | --    |
| Braune Birne                      | 14-003-837  | Büron           | 62   | G1 | 0.982 | G1.1 | 0.982 | 0.982 | 0.018 | 0.944 | 0.056 | --    | --    |
| Poire Rosselet                    | 14-003-518  | Pierre-à-bot    | 63   | G1 | 0.932 | G1.2 | 0.937 | 0.932 | 0.068 | 0.063 | 0.937 | --    | --    |
| Deutsche Kanne                    | 14-003-1315 | Baden           | 63   | G1 | 0.932 | G1.2 | 0.937 | 0.932 | 0.068 | 0.063 | 0.937 | --    | --    |
| unknown                           | 14-003-1331 | Baden           | 63   | G1 | 0.932 | G1.2 | 0.937 | 0.932 | 0.068 | 0.063 | 0.937 | --    | --    |
| unknown                           | 14-003-587  | Büron           | 63   | G1 | 0.932 | G1.2 | 0.937 | 0.932 | 0.068 | 0.063 | 0.937 | --    | --    |
| Kleines Zuckerbirli               | 14-003-912  | Büron           | 63   | G1 | 0.932 | G1.2 | 0.937 | 0.932 | 0.068 | 0.063 | 0.937 | --    | --    |
| unknown                           | 14-003-1463 | Büron           | 63   | G1 | 0.932 | G1.2 | 0.937 | 0.932 | 0.068 | 0.063 | 0.937 | --    | --    |
| Stuttgarter Geishirtle            | 14-003-604  | Knonau          | 63   | G1 | 0.932 | G1.2 | 0.937 | 0.932 | 0.068 | 0.063 | 0.937 | --    | --    |
| Melonenbirne                      | 14-003-788  | Baden           | 64   | G2 | 0.945 | G2.1 | 0.945 | 0.055 | 0.945 | --    | --    | 0.797 | 0.203 |
| Reiholzer                         | 14-003-1373 | Büron           | 64   | G2 | 0.945 | G2.1 | 0.945 | 0.055 | 0.945 | --    | --    | 0.797 | 0.203 |
| Melonenbirne                      | 14-003-918  | Büron           | 64   | G2 | 0.945 | G2.1 | 0.945 | 0.055 | 0.945 | --    | --    | 0.797 | 0.203 |
| Madame Verté                      | 14-003-382  | Roggwil Hofen   | 65   | G2 | 0.973 | G2.2 | 0.973 | 0.027 | 0.973 | --    | --    | 0.171 | 0.829 |
| Reinholzbirne                     | 14-003-498  | Roggwil Hofen   | 65   | G2 | 0.973 | G2.2 | 0.973 | 0.027 | 0.973 | --    | --    | 0.171 | 0.829 |
| Wildling von Einsiedeln           | 14-003-2520 | Aubonne         | 65   | G2 | 0.973 | G2.2 | 0.973 | 0.027 | 0.973 | --    | --    | 0.171 | 0.829 |
| Cothio                            | 14-003-1496 | Roggwil Riedern | 66   | G2 | 0.853 | G2.2 | 0.853 | 0.147 | 0.853 | --    | --    | 0.279 | 0.721 |
| Poiratte                          | 14-003-1497 | Aclens          | 66   | G2 | 0.853 | G2.2 | 0.853 | 0.147 | 0.853 | --    | --    | 0.279 | 0.721 |
| Poire à Cotio                     | 14-003-141  | Pierre-à-bot    | 66   | G2 | 0.853 | G2.2 | 0.853 | 0.147 | 0.853 | --    | --    | 0.279 | 0.721 |
| Poire Courbe                      | 14-003-145  | Pierre-à-bot    | 66   | G2 | 0.853 | G2.2 | 0.853 | 0.147 | 0.853 | --    | --    | 0.279 | 0.721 |
| Glockenbirne                      | 14-003-1040 | Roggwil Riedern | 67   | G2 | 0.974 | G2.1 | 0.974 | 0.026 | 0.974 | --    | --    | 0.739 | 0.261 |
| Speckbirne                        | 14-003-798  | Roggwil Riedern | 67   | G2 | 0.974 | G2.1 | 0.974 | 0.026 | 0.974 | --    | --    | 0.739 | 0.261 |
| Elmenshofer                       | 14-003-1020 | Roggwil Riedern | 67   | G2 | 0.974 | G2.1 | 0.974 | 0.026 | 0.974 | --    | --    | 0.739 | 0.261 |
| Breitbirne                        | 14-003-1034 | Büron           | 67   | G2 | 0.974 | G2.1 | 0.974 | 0.026 | 0.974 | --    | --    | 0.739 | 0.261 |
| Weinbirne                         | 14-003-762  | Büron           | 67   | G2 | 0.974 | G2.1 | 0.974 | 0.026 | 0.974 | --    | --    | 0.739 | 0.261 |
| Speckbirne                        | 14-003-834  | Büron           | 67   | G2 | 0.974 | G2.1 | 0.974 | 0.026 | 0.974 | --    | --    | 0.739 | 0.261 |
| Lümbegsbirne                      | 14-003-1379 | Roggwil Riedern | 68   | G2 | 0.954 | G2.2 | 0.954 | 0.046 | 0.954 | --    | --    | 0.326 | 0.674 |
| unknown                           | 14-003-1371 | Baden           | 68   | G2 | 0.954 | G2.2 | 0.954 | 0.046 | 0.954 | --    | --    | 0.326 | 0.674 |
| Niederländer                      | 14-003-1391 | Büron           | 68   | G2 | 0.954 | G2.2 | 0.954 | 0.046 | 0.954 | --    | --    | 0.326 | 0.674 |
| Meitlibirne                       | 14-003-1381 | Büron           | 68   | G2 | 0.954 | G2.2 | 0.954 | 0.046 | 0.954 | --    | --    | 0.326 | 0.674 |
| Thalbirne                         | 14-003-1393 | Büron           | 68   | G2 | 0.954 | G2.2 | 0.954 | 0.046 | 0.954 | --    | --    | 0.326 | 0.674 |
| Zuckerbirne                       | 14-003-810  | Roggwil Riedern | 69   | G1 | 0.918 | G1.1 | 0.918 | 0.082 | 0.822 | 0.178 | --    | --    | --    |
| Goldlänglerbirne                  | 14-003-846  | Roggwil Riedern | 69   | G1 | 0.918 | G1.1 | 0.918 | 0.082 | 0.822 | 0.178 | --    | --    | --    |
| Blaulängala                       | 14-003-906  | Roggwil Hofen   | 70   | G2 | 0.974 | G2.1 | 0.974 | 0.026 | 0.974 | --    | --    | 0.647 | 0.353 |
| Römische Schmalzbirne             | 14-003-906  | Roggwil Hofen   | 70   | G2 | 0.974 | G2.1 | 0.974 | 0.026 | 0.974 | --    | --    | 0.647 | 0.353 |
| Zuckerbirne                       | 14-003-885  | Büron           | 70   | G2 | 0.974 | G2.1 | 0.974 | 0.026 | 0.974 | --    | --    | 0.647 | 0.353 |
| unknown                           | 14-003-927  | Büron           | 70   | G2 | 0.974 | G2.1 | 0.974 | 0.026 | 0.974 | --    | --    | 0.647 | 0.353 |
| Römische Schmalzbirne             | 14-003-840  | Büron           | 70   | G2 | 0.974 | G2.1 | 0.974 | 0.026 | 0.974 | --    | --    | 0.647 | 0.353 |
| Blaulängala                       | 14-003-906  | Büron           | 70   | G2 | 0.974 | G2.1 | 0.974 | 0.026 | 0.974 | --    | --    | 0.647 | 0.353 |
| Schweizer Bratbirne               | 14-003-564  | Roggwil Hofen   | 71   | G2 | 0.973 | G2.1 | 0.973 | 0.027 | 0.973 | --    | --    | 0.593 | 0.407 |
| Imberwurzen                       | 14-003-317  | Knonau          | 71   | G2 | 0.973 | G2.1 | 0.973 | 0.027 | 0.973 | --    | --    | 0.593 | 0.407 |
| Poire Aberiet                     | 14-003-1139 | Aclens          | 72   | G2 | 0.612 | G2.2 | 0.762 | 0.388 | 0.612 | --    | --    | 0.238 | 0.762 |
| Aberiet                           | 14-003-1535 | Aclens          | 72   | G2 | 0.612 | G2.2 | 0.762 | 0.388 | 0.612 | --    | --    | 0.238 | 0.762 |
| Poire Aberiet                     | 14-003-2    | Pierre-à-bot    | 72   | G2 | 0.612 | G2.2 | 0.762 | 0.388 | 0.612 | --    | --    | 0.238 | 0.762 |
| Poire-Fer                         | 14-003-1145 | Aclens          | 73   | G2 | 0.540 | G2.2 | 0.677 | 0.460 | 0.540 | --    | --    | 0.323 | 0.677 |
| Poire Rêche                       | 14-003-493  | Aclens          | 73   | G2 | 0.540 | G2.2 | 0.677 | 0.460 | 0.540 | --    | --    | 0.323 | 0.677 |
| Poire rêche                       | 14-003-1579 | Aclens          | 73   | G2 | 0.540 | G2.2 | 0.677 | 0.460 | 0.540 | --    | --    | 0.323 | 0.677 |
| Poire Rêche                       | 14-003-492  | Pierre-à-bot    | 73   | G2 | 0.540 | G2.2 | 0.677 | 0.460 | 0.540 | --    | --    | 0.323 | 0.677 |
| Poire à Rissoles                  | 14-003-1570 | Aclens          | 74.1 | G1 | 0.972 | G1.1 | 0.972 | 0.028 | 0.967 | 0.033 | --    | --    | --    |
| Conférence                        | 14-003-2536 | Pierre-à-bot    | 74.1 | G1 | 0.972 | G1.1 | 0.972 | 0.028 | 0.967 | 0.033 | --    | --    | --    |
| Zuckerbirne / Conference          | 14-003-1068 | Baden           | 74.1 | G1 | 0.972 | G1.1 | 0.972 | 0.028 | 0.967 | 0.033 | --    | --    | --    |
| unknown                           | 14-003-1462 | Büron           | 74.1 | G1 | 0.972 | G1.1 | 0.972 | 0.028 | 0.967 | 0.033 | --    | --    | --    |
| unknown                           | 14-003-1395 | Büron           | 74.1 | G1 | 0.972 | G1.1 | 0.972 | 0.028 | 0.967 | 0.033 | --    | --    | --    |
| Conference                        | Reference 4 | Uni Reading     | 74.2 | G1 | 0.948 | G1.1 | 0.968 | 0.948 | 0.052 | 0.968 | 0.032 | --    | --    |
| Tyrola / Tyroler                  | 14-003-1510 | Baden           | 75   | G2 | 0.917 | G2.1 | 0.917 | 0.083 | 0.917 | --    | --    | 0.826 | 0.174 |
| Schmalzbirne von Brest            | 14-003-557  | Büron           | 75   | G2 | 0.917 | G2.1 | 0.917 | 0.083 | 0.917 | --    | --    | 0.826 | 0.174 |
| Poire des moissons                | 14-003-1499 | Pierre-à-bot    | 76   | G1 | 0.904 | G1.2 | 0.904 | 0.904 | 0.096 | 0.108 | 0.892 | --    | --    |
| Poire de moisson                  | 14-003-1499 | Büron           | 76   | G1 | 0.904 | G1.2 | 0.904 | 0.904 | 0.096 | 0.108 | 0.892 | --    | --    |
| Graue Birne                       | 14-003-1104 | Baden           | 77   | G1 | 0.671 | G1.2 | 0.962 | 0.671 | 0.329 | 0.038 | 0.962 | --    | --    |
| Graue Birne                       | 14-003-262  | Knonau          | 77   | G1 | 0.671 | G1.2 | 0.962 | 0.671 | 0.329 | 0.038 | 0.962 | --    | --    |
| Gugerlibirne                      | 14-003-278  | Baden           | 78   | G1 | 0.973 | G1.1 | 0.979 | 0.973 | 0.027 | 0.979 | 0.021 | --    | --    |
| Weisse Herbstbutterbirne          | 14-003-1256 | Baden           | 78   | G1 | 0.973 | G1.1 | 0.979 | 0.973 | 0.027 | 0.979 | 0.021 | --    | --    |
| unknown                           | 14-003-1485 | Büron           | 78   | G1 | 0.973 | G1.1 | 0.979 | 0.973 | 0.027 | 0.979 | 0.021 | --    | --    |
| Pero squisito                     | 14-003-2697 | Manno           | 79   | G1 | 0.942 | G1.2 | 0.942 | 0.942 | 0.058 | 0.132 | 0.868 | --    | --    |
| Pero rossiccio                    | 14-003-2706 | Manno           | 79   | G1 | 0.942 | G1.2 | 0.942 | 0.942 | 0.058 | 0.132 | 0.868 | --    | --    |
| Sept en gueule                    | 14-003-1571 | Aclens          | 79   | G1 | 0.942 | G1.2 | 0.942 | 0.942 | 0.058 | 0.132 | 0.868 | --    | --    |
| Poire gris                        | 14-003-1536 | Aclens          | 79   | G1 | 0.942 | G1.2 | 0.942 | 0.942 | 0.058 | 0.132 | 0.868 | --    | --    |
| Poire des Moissons                | 14-003-1575 | Aclens          | 79   | G1 | 0.942 | G1.2 | 0.942 | 0.942 | 0.058 | 0.132 | 0.868 | --    | --    |
| Poire à Rissole                   | 14-003-1157 | Aclens          | 79   | G1 | 0.942 | G1.2 | 0.942 | 0.942 | 0.058 | 0.132 | 0.868 | --    | --    |
| Poire Roh                         | 14-003-1558 | Aclens          | 79   | G1 | 0.942 | G1.2 | 0.942 | 0.942 | 0.058 | 0.132 | 0.868 | --    | --    |
| Laurent                           | 14-003-1551 | Aclens          | 79   | G1 | 0.942 | G1.2 | 0.942 | 0.942 | 0.058 | 0.132 | 0.868 | --    | --    |
| Poire Beurré Gris                 | 14-003-53   | Pierre-à-bot    | 79   | G1 | 0.942 | G1.2 | 0.942 | 0.942 | 0.058 | 0.132 | 0.868 | --    | --    |
| Poire Blesson rouge de Ballaigues | 14-003-1117 | Pierre-à-bot    | 79   | G1 | 0.942 | G1.2 | 0.942 | 0.942 | 0.058 | 0.132 | 0.868 | --    | --    |
| Poire Canéet                      | 14-003-1119 | Pierre-à-bot    | 79   | G1 | 0.942 | G1.2 | 0.942 | 0.942 | 0.058 | 0.132 | 0.868 | --    | --    |
| Poire Fricot                      | 14-003-1552 | Pierre-à-bot    | 79   | G1 | 0.942 | G1.2 | 0.942 | 0.942 | 0.058 | 0.132 | 0.868 | --    | --    |
| Poir Gägubirli                    | 14-003-1515 | Pierre-à-bot    | 79   | G1 | 0.942 | G1.2 | 0.942 | 0.942 | 0.058 | 0.132 | 0.868 | --    | --    |
| Poire Olivette                    | 14-003-437  | Pierre-à-bot    | 79   | G1 | 0.942 | G1.2 | 0.942 | 0.942 | 0.058 | 0.132 | 0.868 | --    | --    |
| Poire Rousselette                 | 14-003-531  | Pierre-à-bot    | 79   | G1 | 0.942 | G1.2 | 0.942 | 0.942 | 0.058 | 0.132 | 0.868 | --    | --    |
| Poire Wasserbirne                 | 14-003-1191 | Pierre-à-bot    | 79   | G1 | 0.942 | G1.2 | 0.942 | 0.942 | 0.058 | 0.132 | 0.868 | --    | --    |
| Poire Hasebirne                   | 14-003-2533 | Pierre-à-bot    | 79   | G1 | 0.942 | G1.2 | 0.942 | 0.942 | 0.058 | 0.132 | 0.868 | --    | --    |
| Poire Steinmürbirne               | 14-003-594  | Pierre-à-bot    | 79   | G1 | 0.942 | G1.2 | 0.942 | 0.942 | 0.058 | 0.132 | 0.868 | --    | --    |
| unknown                           | 14-003-1452 | Büron           | 79   | G1 | 0.942 | G1.2 | 0.942 | 0.942 | 0.058 | 0.132 | 0.868 | --    | --    |
| unknown                           | 14-003-1451 | Büron           | 79   | G1 | 0.942 | G1.2 | 0.942 | 0.942 | 0.058 | 0.132 | 0.868 | --    | --    |
| Rebenbirne                        | 14-003-490  | Knonau          | 79   | G1 | 0.942 | G1.2 | 0.942 | 0.942 | 0.058 | 0.132 | 0.868 | --    | --    |

|                           |             |                    |      |    |       |      |       |       |       |       |       |       |       |
|---------------------------|-------------|--------------------|------|----|-------|------|-------|-------|-------|-------|-------|-------|-------|
| Pisò di Vescràa           | 14-003-2714 | Manno              | 80   | G1 | 0.797 | G1.2 | 0.928 | 0.797 | 0.203 | 0.072 | 0.928 | --    | --    |
| Poire Ostan               | 14-003-442  | Pierre-à-bot       | 80   | G1 | 0.797 | G1.2 | 0.928 | 0.797 | 0.203 | 0.072 | 0.928 | --    | --    |
| Poire Pape                | 14-003-448  | Pierre-à-bot       | 80   | G1 | 0.797 | G1.2 | 0.928 | 0.797 | 0.203 | 0.072 | 0.928 | --    | --    |
| Pape                      | 14-003-1550 | Büron              | 80   | G1 | 0.797 | G1.2 | 0.928 | 0.797 | 0.203 | 0.072 | 0.928 | --    | --    |
| Weisse Welschbirne        | 14-003-746  | Roggwil Riedern    | 81   | G2 | 0.712 | G2.1 | 0.712 | 0.288 | 0.712 | --    | --    | 0.596 | 0.404 |
| Champagner                | 14-003-666  | Büron              | 81   | G2 | 0.712 | G2.1 | 0.712 | 0.288 | 0.712 | --    | --    | 0.596 | 0.404 |
| Dornbirne                 | 14-003-1320 | Koppigen           | 82   | G1 | 0.708 | G1.2 | 0.795 | 0.708 | 0.292 | 0.205 | 0.795 | --    | --    |
| unknown                   | 14-003-1217 | Koppigen           | 82   | G1 | 0.708 | G1.2 | 0.795 | 0.708 | 0.292 | 0.205 | 0.795 | --    | --    |
| Ulmer Butterbirne         | 14-003-637  | Roggwil Hofen      | 83   | G1 | 0.913 | G1.1 | 0.913 | 0.913 | 0.087 | 0.903 | 0.097 | --    | --    |
| Langstiel                 | 14-003-1375 | Baden              | 83   | G1 | 0.913 | G1.1 | 0.913 | 0.913 | 0.087 | 0.903 | 0.097 | --    | --    |
| Schürbirne                | 14-003-560  | Aubonne            | 84   | G2 | 0.969 | G2.2 | 0.969 | 0.031 | 0.969 | --    | --    | 0.440 | 0.560 |
| Poire Epine               | 14-003-1521 | Aclens             | 84   | G2 | 0.969 | G2.2 | 0.969 | 0.031 | 0.969 | --    | --    | 0.440 | 0.560 |
| Poire Epine               | 14-003-187  | Pierre-à-bot       | 84   | G2 | 0.969 | G2.2 | 0.969 | 0.031 | 0.969 | --    | --    | 0.440 | 0.560 |
| Épine                     | 14-003-1521 | Pierre-à-bot       | 84   | G2 | 0.969 | G2.2 | 0.969 | 0.031 | 0.969 | --    | --    | 0.440 | 0.560 |
| Fernate d'hiver           | 14-003-2509 | Aubonne            | 85   | G1 | 0.718 | G1.2 | 0.815 | 0.718 | 0.282 | 0.185 | 0.815 | --    | --    |
| Poire Fernate d'hiver     | 14-003-201  | Pierre-à-bot       | 85   | G1 | 0.718 | G1.2 | 0.815 | 0.718 | 0.282 | 0.185 | 0.815 | --    | --    |
| Poire farine              | 14-003-2515 | Aubonne            | 86   | G2 | 0.802 | G2.2 | 0.802 | 0.198 | 0.802 | --    | --    | 0.411 | 0.589 |
| Poire Fernattes           | 14-003-1498 | Aclens             | 86   | G2 | 0.802 | G2.2 | 0.802 | 0.198 | 0.802 | --    | --    | 0.411 | 0.589 |
| Poire Fernatte            | 14-003-200  | Pierre-à-bot       | 86   | G2 | 0.802 | G2.2 | 0.802 | 0.198 | 0.802 | --    | --    | 0.411 | 0.589 |
| Fernatte                  | 14-003-1504 | Pierre-à-bot       | 86   | G2 | 0.802 | G2.2 | 0.802 | 0.198 | 0.802 | --    | --    | 0.411 | 0.589 |
| Poire Fernotte            | 14-003-202  | Pierre-à-bot       | 86   | G2 | 0.802 | G2.2 | 0.802 | 0.198 | 0.802 | --    | --    | 0.411 | 0.589 |
| Poire Mehlbirne           | 14-003-398  | Pierre-à-bot       | 86   | G2 | 0.802 | G2.2 | 0.802 | 0.198 | 0.802 | --    | --    | 0.411 | 0.589 |
| Blesson dur               | 14-003-2500 | Aubonne            | 87   | G1 | 0.560 | G1.2 | 0.896 | 0.560 | 0.440 | 0.104 | 0.896 | --    | --    |
| Poire Prodige             | 14-003-59   | Pierre-à-bot       | 87   | G1 | 0.560 | G1.2 | 0.896 | 0.560 | 0.440 | 0.104 | 0.896 | --    | --    |
| Poire Bellosin            | 14-003-2528 | Aclens             | 88   | G2 | 0.609 | G2.2 | 0.673 | 0.391 | 0.609 | --    | --    | 0.327 | 0.673 |
| Poire Rogin               | 14-003-509  | Aclens             | 88   | G2 | 0.609 | G2.2 | 0.673 | 0.391 | 0.609 | --    | --    | 0.327 | 0.673 |
| Poire Bacon               | 14-003-22   | Pierre-à-bot       | 89   | G1 | 0.969 | G1.1 | 0.969 | 0.969 | 0.031 | 0.699 | 0.301 | --    | --    |
| Poire Muscat              | 14-003-420  | Pierre-à-bot       | 89   | G1 | 0.969 | G1.1 | 0.969 | 0.969 | 0.031 | 0.699 | 0.301 | --    | --    |
| Poire Noir                | 14-003-431  | Pierre-à-bot       | 90   | G2 | 0.950 | G2.2 | 0.950 | 0.050 | 0.950 | --    | --    | 0.347 | 0.653 |
| unknown                   | 14-003-739  | Büron              | 90   | G2 | 0.950 | G2.2 | 0.950 | 0.050 | 0.950 | --    | --    | 0.347 | 0.653 |
| Braunbirne                | 14-003-723  | Roggwil Riedern    | 91   | G1 | 0.719 | G1.1 | 0.719 | 0.719 | 0.281 | 0.639 | 0.361 | --    | --    |
| Sonnenbirne               | 14-003-1449 | Roggwil Riedern    | 91   | G1 | 0.719 | G1.1 | 0.719 | 0.719 | 0.281 | 0.639 | 0.361 | --    | --    |
| Muskateller               | 14-003-705  | Baden              | 91   | G1 | 0.719 | G1.1 | 0.719 | 0.719 | 0.281 | 0.639 | 0.361 | --    | --    |
| Grande queue              | 14-003-1563 | Aclens             | 92   | G2 | 0.951 | G2.2 | 0.951 | 0.049 | 0.951 | --    | --    | 0.488 | 0.512 |
| Poire Epine               | 14-003-188  | Pierre-à-bot       | 92   | G2 | 0.951 | G2.2 | 0.951 | 0.049 | 0.951 | --    | --    | 0.488 | 0.512 |
| Mutschgenteller           | 14-003-1252 | Baden              | 92   | G2 | 0.951 | G2.2 | 0.951 | 0.049 | 0.951 | --    | --    | 0.488 | 0.512 |
| Rote Muskateller          | 14-003-523  | Knonau             | 92   | G2 | 0.951 | G2.2 | 0.951 | 0.049 | 0.951 | --    | --    | 0.488 | 0.512 |
| Fleischbirne              | 14-003-1029 | Roggwil Riedern    | 93.1 | G2 | 0.679 | G2.1 | 0.771 | 0.321 | 0.679 | --    | --    | 0.771 | 0.229 |
| Späte Hansli              | 14-003-1351 | Büron              | 93.1 | G2 | 0.679 | G2.1 | 0.771 | 0.321 | 0.679 | --    | --    | 0.771 | 0.229 |
| Butterbirne               | 14-003-1321 | Roggwil Riedern    | 93.2 | G1 | 0.896 | G1.1 | 0.896 | 0.896 | 0.104 | 0.756 | 0.244 | --    | --    |
| Fuchsbirne                | 14-003-830  | Roggwil Riedern    | 94   | G1 | 0.977 | G1.1 | 0.984 | 0.977 | 0.023 | 0.984 | 0.016 | --    | --    |
| unknown                   | 14-003-1439 | Büron              | 94   | G1 | 0.977 | G1.1 | 0.984 | 0.977 | 0.023 | 0.984 | 0.016 | --    | --    |
| unknown                   | 14-003-1529 | Büron              | 94   | G1 | 0.977 | G1.1 | 0.984 | 0.977 | 0.023 | 0.984 | 0.016 | --    | --    |
| unknown                   | 14-003-1459 | Büron              | 94   | G1 | 0.977 | G1.1 | 0.984 | 0.977 | 0.023 | 0.984 | 0.016 | --    | --    |
| Turgauer Weinbirnen       | 14-003-1376 | Roggwil Riedern    | 95   | G2 | 0.949 | G2.1 | 0.949 | 0.051 | 0.949 | --    | --    | 0.511 | 0.489 |
| Gunterzhauser             | 14-003-741  | Roggwil Riedern    | 95   | G2 | 0.949 | G2.1 | 0.949 | 0.051 | 0.949 | --    | --    | 0.511 | 0.489 |
| unknown                   | 14-003-1457 | Roggwil Riedern    | 95   | G2 | 0.949 | G2.1 | 0.949 | 0.051 | 0.949 | --    | --    | 0.511 | 0.489 |
| Ottenbacher Schellerbirne | 14-003-444  | Roggwil Hofen      | 95   | G2 | 0.949 | G2.1 | 0.949 | 0.051 | 0.949 | --    | --    | 0.511 | 0.489 |
| Glockenbirne              | 14-003-247  | Pierre-à-bot       | 95   | G2 | 0.949 | G2.1 | 0.949 | 0.051 | 0.949 | --    | --    | 0.511 | 0.489 |
| Widilämpä                 | 14-003-989  | Büron              | 95   | G2 | 0.949 | G2.1 | 0.949 | 0.051 | 0.949 | --    | --    | 0.511 | 0.489 |
| Winterbirne               | 14-003-811  | Büron              | 95   | G2 | 0.949 | G2.1 | 0.949 | 0.051 | 0.949 | --    | --    | 0.511 | 0.489 |
| unknown                   | 14-003-1432 | Büron              | 95   | G2 | 0.949 | G2.1 | 0.949 | 0.051 | 0.949 | --    | --    | 0.511 | 0.489 |
| unknown                   | 14-003-1493 | Büron              | 95   | G2 | 0.949 | G2.1 | 0.949 | 0.051 | 0.949 | --    | --    | 0.511 | 0.489 |
| unknown                   | 14-003-1429 | Roggwil Riedern    | 96   | G2 | 0.979 | G2.1 | 0.979 | 0.021 | 0.979 | --    | --    | 0.771 | 0.229 |
| Forellenbirne             | 14-003-215  | Koppigen           | 96   | G2 | 0.979 | G2.1 | 0.979 | 0.021 | 0.979 | --    | --    | 0.771 | 0.229 |
| Hanslibirne               | 14-003-288  | Roggwil Hofen      | 96   | G2 | 0.979 | G2.1 | 0.979 | 0.021 | 0.979 | --    | --    | 0.771 | 0.229 |
| unknown                   | 14-003-1339 | Baden              | 96   | G2 | 0.979 | G2.1 | 0.979 | 0.021 | 0.979 | --    | --    | 0.771 | 0.229 |
| Zuckerbirne               | 14-003-777  | Büron              | 96   | G2 | 0.979 | G2.1 | 0.979 | 0.021 | 0.979 | --    | --    | 0.771 | 0.229 |
| Grünbirne                 | 14-003-1273 | Koppigen           | 97   | G2 | 0.800 | G2.1 | 0.800 | 0.200 | 0.800 | --    | --    | 0.546 | 0.454 |
| Bruembirne / Wörgibire    | 14-003-1262 | Koppigen           | 97   | G2 | 0.800 | G2.1 | 0.800 | 0.200 | 0.800 | --    | --    | 0.546 | 0.454 |
| Hengeln                   | 14-003-1289 | Koppigen           | 97   | G2 | 0.800 | G2.1 | 0.800 | 0.200 | 0.800 | --    | --    | 0.546 | 0.454 |
| Stillbirne                | 14-003-1102 | Koppigen           | 97   | G2 | 0.800 | G2.1 | 0.800 | 0.200 | 0.800 | --    | --    | 0.546 | 0.454 |
| Rotbärtler                | 14-003-1248 | Koppigen           | 97   | G2 | 0.800 | G2.1 | 0.800 | 0.200 | 0.800 | --    | --    | 0.546 | 0.454 |
| Walliser Sämling          | 14-003-1580 | Roggwil Hofen      | 98   | G2 | 0.698 | G2.2 | 0.698 | 0.302 | 0.698 | --    | --    | 0.329 | 0.671 |
| Poire Honig Birnen        | 14-003-1540 | Pierre-à-bot       | 98   | G2 | 0.698 | G2.2 | 0.698 | 0.302 | 0.698 | --    | --    | 0.329 | 0.671 |
| Honigbirne                | 14-003-1540 | Büron              | 98   | G2 | 0.698 | G2.2 | 0.698 | 0.302 | 0.698 | --    | --    | 0.329 | 0.671 |
| Poire rougin              | 14-003-2525 | Aubonne            | 99   | G1 | 0.881 | G1.1 | 0.881 | 0.881 | 0.119 | 0.546 | 0.454 | --    | --    |
| Poire-Bouteille           | 14-003-1143 | Aclens             | 99   | G1 | 0.881 | G1.1 | 0.881 | 0.881 | 0.119 | 0.546 | 0.454 | --    | --    |
| Poire d' Orient           | 14-003-441  | Pierre-à-bot       | 99   | G1 | 0.881 | G1.1 | 0.881 | 0.881 | 0.119 | 0.546 | 0.454 | --    | --    |
| unknown                   | 14-003-1342 | Baden              | 100  | G1 | 0.641 | G1.2 | 0.761 | 0.641 | 0.359 | 0.239 | 0.761 | --    | --    |
| unknown                   | 14-003-1475 | Büron              | 100  | G1 | 0.641 | G1.2 | 0.761 | 0.641 | 0.359 | 0.239 | 0.761 | --    | --    |
| Stuttgarter Birne         | 14-003-774  | Büron              | 100  | G1 | 0.641 | G1.2 | 0.761 | 0.641 | 0.359 | 0.239 | 0.761 | --    | --    |
| Schürbirne                | 14-003-560  | Bözberg-Vierlinden | 100  | G1 | 0.641 | G1.2 | 0.761 | 0.641 | 0.359 | 0.239 | 0.761 | --    | --    |
| Cuisse Dame               | 14-003-1559 | Aclens             | 101  | G1 | 0.762 | G1.2 | 0.957 | 0.762 | 0.238 | 0.043 | 0.957 | --    | --    |
| unknown                   | 14-003-1043 | Büron              | 101  | G1 | 0.762 | G1.2 | 0.957 | 0.762 | 0.238 | 0.043 | 0.957 | --    | --    |
| Dornbirne                 | 14-003-1523 | Aclens             | 102  | G2 | 0.929 | G2.1 | 0.929 | 0.071 | 0.929 | --    | --    | 0.700 | 0.300 |
| Dornbirne                 | 14-003-1033 | Baden              | 102  | G2 | 0.929 | G2.1 | 0.929 | 0.071 | 0.929 | --    | --    | 0.700 | 0.300 |
| Rotbärtler                | 14-003-1404 | Baden              | 103  | G2 | 0.969 | G2.2 | 0.969 | 0.031 | 0.969 | --    | --    | 0.073 | 0.927 |
| Goldbirli                 | 14-003-984  | Büron              | 103  | G2 | 0.969 | G2.2 | 0.969 | 0.031 | 0.969 | --    | --    | 0.073 | 0.927 |
| Poire Muscat              | 14-003-423  | Aclens             | 104  | G2 | 0.920 | G2.2 | 0.920 | 0.080 | 0.920 | --    | --    | 0.460 | 0.540 |
| Poire Sept-en-Gueule      | 14-003-1134 | Pierre-à-bot       | 104  | G2 | 0.920 | G2.2 | 0.920 | 0.080 | 0.920 | --    | --    | 0.460 | 0.540 |
| Züribirne                 | 14-003-796  | Baden              | 105  | G2 | 0.954 | G2.2 | 0.954 | 0.046 | 0.954 | --    | --    | 0.389 | 0.611 |
| Züribirne                 | 14-003-797  | Büron              | 105  | G2 | 0.954 | G2.2 | 0.954 | 0.046 | 0.954 | --    | --    | 0.389 | 0.611 |
| Zuckerbirne               | 14-003-836  | Büron              | 105  | G2 | 0.954 | G2.2 | 0.954 | 0.046 | 0.954 | --    | --    | 0.389 | 0.611 |
| Köstliche von Charneu     | 14-003-1024 | Baden              | 106  | G1 | 0.940 | G1.2 | 0.940 | 0.940 | 0.060 | 0.449 | 0.551 | --    | --    |
| Köstliche von Charneu     | 14-003-344  | Knonau             | 106  | G1 | 0.940 | G1.2 | 0.940 | 0.940 | 0.060 | 0.449 | 0.551 | --    | --    |
| Meerbirne                 | 14-003-1385 | Baden              | 107  | G2 | 0.585 | G2.1 | 0.589 | 0.415 | 0.585 | --    | --    | 0.589 | 0.411 |

|                                  |             |                 |     |    |       |      |       |       |       |       |       |       |       |
|----------------------------------|-------------|-----------------|-----|----|-------|------|-------|-------|-------|-------|-------|-------|-------|
| Meerbirne                        | 14-003-706  | Baden           | 107 | G2 | 0.585 | G2.1 | 0.589 | 0.415 | 0.585 | --    | --    | 0.589 | 0.411 |
| Späte Islerbirne                 | 14-003-1443 | Baden           | 107 | G2 | 0.585 | G2.1 | 0.589 | 0.415 | 0.585 | --    | --    | 0.589 | 0.411 |
| Wegbirne                         | 14-003-1346 | Koppigen        | 108 | G1 | 0.970 | G1.2 | 0.970 | 0.970 | 0.030 | 0.097 | 0.903 | --    | --    |
| Clarmont                         | 14-003-2504 | Aclens          | 108 | G1 | 0.970 | G1.2 | 0.970 | 0.970 | 0.030 | 0.097 | 0.903 | --    | --    |
| unknown                          | 14-003-1079 | Baden           | 108 | G1 | 0.970 | G1.2 | 0.970 | 0.970 | 0.030 | 0.097 | 0.903 | --    | --    |
| Eierbirne                        | 14-003-791  | Büron           | 108 | G1 | 0.970 | G1.2 | 0.970 | 0.970 | 0.030 | 0.097 | 0.903 | --    | --    |
| Winterbirne                      | 14-003-877  | Büron           | 108 | G1 | 0.970 | G1.2 | 0.970 | 0.970 | 0.030 | 0.097 | 0.903 | --    | --    |
| Fressbirne                       | 14-003-744  | Büron           | 108 | G1 | 0.970 | G1.2 | 0.970 | 0.970 | 0.030 | 0.097 | 0.903 | --    | --    |
| Märxlera                         | 14-003-772  | Büron           | 108 | G1 | 0.970 | G1.2 | 0.970 | 0.970 | 0.030 | 0.097 | 0.903 | --    | --    |
| Pero Campestro                   | 14-003-2564 | Manno           | 109 | G1 | 0.963 | G1.1 | 0.963 | 0.963 | 0.037 | 0.632 | 0.368 | --    | --    |
| Sal22                            | 14-003-2552 | Manno           | 109 | G1 | 0.963 | G1.1 | 0.963 | 0.963 | 0.037 | 0.632 | 0.368 | --    | --    |
| Sconosciuto prob. locale         | 14-003-2590 | Manno           | 110 | G1 | 0.975 | G1.1 | 0.975 | 0.975 | 0.025 | 0.910 | 0.090 | --    | --    |
| Poire Giffard Bttb.              | 14-003-2537 | Pierre-à-bot    | 110 | G1 | 0.975 | G1.1 | 0.975 | 0.975 | 0.025 | 0.910 | 0.090 | --    | --    |
| Frühbirne                        | 14-003-779  | Baden           | 110 | G1 | 0.975 | G1.1 | 0.975 | 0.975 | 0.025 | 0.910 | 0.090 | --    | --    |
| Butterbirne                      | 14-003-986  | Büron           | 110 | G1 | 0.975 | G1.1 | 0.975 | 0.975 | 0.025 | 0.910 | 0.090 | --    | --    |
| Giffards Butterbirne             | 14-003-52   | Büron           | 110 | G1 | 0.975 | G1.1 | 0.975 | 0.975 | 0.025 | 0.910 | 0.090 | --    | --    |
| Legibirne                        | 14-003-366  | Höri            | 110 | G1 | 0.975 | G1.1 | 0.975 | 0.975 | 0.025 | 0.910 | 0.090 | --    | --    |
| Pero peduncolo lungo             | 14-003-2560 | Manno           | 111 | G1 | 0.973 | G1.2 | 0.973 | 0.973 | 0.027 | 0.064 | 0.936 | --    | --    |
| Sconosciuto prob. locale         | 14-003-2583 | Manno           | 111 | G1 | 0.973 | G1.2 | 0.973 | 0.973 | 0.027 | 0.064 | 0.936 | --    | --    |
| unknown                          | 14-003-1437 | Baden           | 111 | G1 | 0.973 | G1.2 | 0.973 | 0.973 | 0.027 | 0.064 | 0.936 | --    | --    |
| Butterbirne                      | 14-003-785  | Baden           | 111 | G1 | 0.973 | G1.2 | 0.973 | 0.973 | 0.027 | 0.064 | 0.936 | --    | --    |
| Wulliwusch                       | 14-003-817  | Baden           | 111 | G1 | 0.973 | G1.2 | 0.973 | 0.973 | 0.027 | 0.064 | 0.936 | --    | --    |
| unknown                          | 14-003-758  | Büron           | 111 | G1 | 0.973 | G1.2 | 0.973 | 0.973 | 0.027 | 0.064 | 0.936 | --    | --    |
| Welsche Isler                    | 14-003-1411 | Büron           | 111 | G1 | 0.973 | G1.2 | 0.973 | 0.973 | 0.027 | 0.064 | 0.936 | --    | --    |
| Ankenbirne                       | 14-003-1309 | Dürrenäsch      | 111 | G1 | 0.973 | G1.2 | 0.973 | 0.973 | 0.027 | 0.064 | 0.936 | --    | --    |
| Goldlänglerbirne                 | 14-003-886  | Roggwil Riedern | 112 | G1 | 0.942 | G1.2 | 0.964 | 0.942 | 0.058 | 0.036 | 0.964 | --    | --    |
| Goldlängelerbirne                | 14-003-886  | Büron           | 112 | G1 | 0.942 | G1.2 | 0.964 | 0.942 | 0.058 | 0.036 | 0.964 | --    | --    |
| Speckbirne                       | 14-003-803  | Büron           | 112 | G1 | 0.942 | G1.2 | 0.964 | 0.942 | 0.058 | 0.036 | 0.964 | --    | --    |
| Pera del coco                    | 14-003-1519 | Roggwil Riedern | 113 | G1 | 0.984 | G1.1 | 0.984 | 0.984 | 0.016 | 0.899 | 0.101 | --    | --    |
| Rosalettibirne/Frühe aus Trévoux | 14-003-1059 | Baden           | 113 | G1 | 0.984 | G1.1 | 0.984 | 0.984 | 0.016 | 0.899 | 0.101 | --    | --    |
| Noir                             | 14-003-1572 | Roggwil Riedern | 114 | G2 | 0.946 | G2.2 | 0.946 | 0.054 | 0.946 | --    | --    | 0.316 | 0.684 |
| Isler                            | 14-003-726  | Roggwil Riedern | 114 | G2 | 0.946 | G2.2 | 0.946 | 0.054 | 0.946 | --    | --    | 0.316 | 0.684 |
| Madame Favre                     | 14-003-380  | Roggwil Riedern | 115 | G1 | 0.921 | G1.2 | 0.921 | 0.921 | 0.079 | 0.354 | 0.646 | --    | --    |
| Poire citron                     | 14-003-1507 | Aclens          | 115 | G1 | 0.921 | G1.2 | 0.921 | 0.921 | 0.079 | 0.354 | 0.646 | --    | --    |
| Poire-citron                     | 14-003-1534 | Aclens          | 115 | G1 | 0.921 | G1.2 | 0.921 | 0.921 | 0.079 | 0.354 | 0.646 | --    | --    |
| Poire Beurré d'Amanlis           | 14-003-1189 | Pierre-à-bot    | 115 | G1 | 0.921 | G1.2 | 0.921 | 0.921 | 0.079 | 0.354 | 0.646 | --    | --    |
| Winterkönigin                    | 14-003-1023 | Roggwil Riedern | 116 | G1 | 0.959 | G1.1 | 0.981 | 0.959 | 0.041 | 0.981 | 0.019 | --    | --    |
| Alexandrine Douillard            | 14-003-8    | Roggwil Riedern | 116 | G1 | 0.959 | G1.1 | 0.981 | 0.959 | 0.041 | 0.981 | 0.019 | --    | --    |
| unknown                          | 14-003-1491 | Büron           | 116 | G1 | 0.959 | G1.1 | 0.981 | 0.959 | 0.041 | 0.981 | 0.019 | --    | --    |
| Flons Dechantsbirne              | 14-003-1419 | Roggwil Riedern | 117 | G1 | 0.816 | G1.1 | 0.893 | 0.816 | 0.184 | 0.893 | 0.107 | --    | --    |
| Poire Bergamotte                 | 14-003-2529 | Aclens          | 117 | G1 | 0.816 | G1.1 | 0.893 | 0.816 | 0.184 | 0.893 | 0.107 | --    | --    |
| Poire de Zir                     | 14-003-687  | Pierre-à-bot    | 117 | G1 | 0.816 | G1.1 | 0.893 | 0.816 | 0.184 | 0.893 | 0.107 | --    | --    |
| Poire Crassane                   | 14-003-148  | Pierre-à-bot    | 117 | G1 | 0.816 | G1.1 | 0.893 | 0.816 | 0.184 | 0.893 | 0.107 | --    | --    |
| Grünbirne                        | 14-003-750  | Roggwil Riedern | 118 | G2 | 0.879 | G2.2 | 0.879 | 0.121 | 0.879 | --    | --    | 0.344 | 0.656 |
| Herteigler                       | 14-003-802  | Roggwil Riedern | 118 | G2 | 0.879 | G2.2 | 0.879 | 0.121 | 0.879 | --    | --    | 0.344 | 0.656 |
| Gelbmöstler                      | 14-003-235  | Höri            | 118 | G2 | 0.879 | G2.2 | 0.879 | 0.121 | 0.879 | --    | --    | 0.344 | 0.656 |
| Buchsibire                       | 14-003-1232 | Koppigen        | 118 | G2 | 0.879 | G2.2 | 0.879 | 0.121 | 0.879 | --    | --    | 0.344 | 0.656 |
| unknown                          | 14-003-1442 | Koppigen        | 118 | G2 | 0.879 | G2.2 | 0.879 | 0.121 | 0.879 | --    | --    | 0.344 | 0.656 |
| Poire Collet                     | 14-003-132  | Pierre-à-bot    | 118 | G2 | 0.879 | G2.2 | 0.879 | 0.121 | 0.879 | --    | --    | 0.344 | 0.656 |
| Kugelförmige Mostbirne           | 14-003-1398 | Büron           | 118 | G2 | 0.879 | G2.2 | 0.879 | 0.121 | 0.879 | --    | --    | 0.344 | 0.656 |
| Gelbsüsslerbirne                 | 14-003-841  | Büron           | 118 | G2 | 0.879 | G2.2 | 0.879 | 0.121 | 0.879 | --    | --    | 0.344 | 0.656 |
| Büschelbirne                     | 14-003-1327 | Koppigen        | 119 | G1 | 0.613 | G1.1 | 0.613 | 0.613 | 0.387 | 0.514 | 0.486 | --    | --    |
| Hirschbirli                      | 14-003-1288 | Koppigen        | 119 | G1 | 0.613 | G1.1 | 0.613 | 0.613 | 0.387 | 0.514 | 0.486 | --    | --    |
| Einsiedlerbirne                  | 14-003-1401 | Baden           | 120 | G2 | 0.818 | G2.2 | 0.878 | 0.182 | 0.818 | --    | --    | 0.122 | 0.878 |
| Lederbirne                       | 14-003-961  | Büron           | 120 | G2 | 0.818 | G2.2 | 0.878 | 0.182 | 0.818 | --    | --    | 0.122 | 0.878 |
| Späte Weinbirne                  | 14-003-977  | Büron           | 121 | G1 | 0.502 | G1.2 | 0.876 | 0.502 | 0.498 | 0.124 | 0.876 | --    | --    |
| Kellers Mostbirne                | 14-003-944  | Büron           | 121 | G1 | 0.502 | G1.2 | 0.876 | 0.502 | 0.498 | 0.124 | 0.876 | --    | --    |
| Couenla                          | 14-003-2507 | Aubonne         | 122 | G1 | 0.539 | G1.2 | 0.942 | 0.539 | 0.461 | 0.058 | 0.942 | --    | --    |
| Poire Couenla                    | 14-003-144  | Aclens          | 122 | G1 | 0.539 | G1.2 | 0.942 | 0.539 | 0.461 | 0.058 | 0.942 | --    | --    |
| Poire Couëla                     | 14-003-143  | Pierre-à-bot    | 122 | G1 | 0.539 | G1.2 | 0.942 | 0.539 | 0.461 | 0.058 | 0.942 | --    | --    |
| Botzi jaune                      | 14-003-2501 | Aubonne         | 123 | G1 | 0.796 | G1.2 | 0.796 | 0.796 | 0.204 | 0.362 | 0.638 | --    | --    |
| Botzi rouge                      | 14-003-2502 | Aubonne         | 123 | G1 | 0.796 | G1.2 | 0.796 | 0.796 | 0.204 | 0.362 | 0.638 | --    | --    |
| Grüne Büschelbirne               | 14-003-270  | Aclens          | 123 | G1 | 0.796 | G1.2 | 0.796 | 0.796 | 0.204 | 0.362 | 0.638 | --    | --    |
| Poire à Botsi                    | 14-003-1142 | Aclens          | 123 | G1 | 0.796 | G1.2 | 0.796 | 0.796 | 0.204 | 0.362 | 0.638 | --    | --    |
| Böztris                          | 14-003-1564 | Aclens          | 123 | G1 | 0.796 | G1.2 | 0.796 | 0.796 | 0.204 | 0.362 | 0.638 | --    | --    |
| Poire Epine                      | 14-003-1144 | Aclens          | 123 | G1 | 0.796 | G1.2 | 0.796 | 0.796 | 0.204 | 0.362 | 0.638 | --    | --    |
| Poire Verde                      | 14-003-1530 | Aclens          | 123 | G1 | 0.796 | G1.2 | 0.796 | 0.796 | 0.204 | 0.362 | 0.638 | --    | --    |
| Poire à Botsi                    | 14-003-1118 | Pierre-à-bot    | 123 | G1 | 0.796 | G1.2 | 0.796 | 0.796 | 0.204 | 0.362 | 0.638 | --    | --    |
| Hornuser                         | 14-003-715  | Baden           | 124 | G1 | 0.871 | G1.1 | 0.871 | 0.871 | 0.129 | 0.843 | 0.157 | --    | --    |
| Fritzenbirne                     | 14-003-1405 | Büron           | 124 | G1 | 0.871 | G1.1 | 0.871 | 0.871 | 0.129 | 0.843 | 0.157 | --    | --    |
| Schifferbirne                    | 14-003-865  | Büron           | 124 | G1 | 0.871 | G1.1 | 0.871 | 0.871 | 0.129 | 0.843 | 0.157 | --    | --    |
| Arthur                           | 14-003-819  | Büron           | 124 | G1 | 0.871 | G1.1 | 0.871 | 0.871 | 0.129 | 0.843 | 0.157 | --    | --    |
| Biesson                          | 14-003-1547 | Aclens          | 125 | G2 | 0.586 | G2.2 | 0.756 | 0.414 | 0.586 | --    | --    | 0.244 | 0.756 |
| Poire Bièchon                    | 14-003-57   | Pierre-à-bot    | 125 | G2 | 0.586 | G2.2 | 0.756 | 0.414 | 0.586 | --    | --    | 0.244 | 0.756 |
| Poire Biesson                    | 14-003-1138 | Pierre-à-bot    | 125 | G2 | 0.586 | G2.2 | 0.756 | 0.414 | 0.586 | --    | --    | 0.244 | 0.756 |
| Poire Pomme-Poire                | 14-003-472  | Pierre-à-bot    | 125 | G2 | 0.586 | G2.2 | 0.756 | 0.414 | 0.586 | --    | --    | 0.244 | 0.756 |
| Holzbirne                        | 14-003-1517 | Aclens          | 126 | G1 | 0.843 | G1.2 | 0.843 | 0.843 | 0.157 | 0.233 | 0.767 | --    | --    |
| Winterchristbirne                | 14-003-675  | Baden           | 126 | G1 | 0.843 | G1.2 | 0.843 | 0.843 | 0.157 | 0.233 | 0.767 | --    | --    |
| Winter-Christbirne               | 14-003-1272 | Büron           | 126 | G1 | 0.843 | G1.2 | 0.843 | 0.843 | 0.157 | 0.233 | 0.767 | --    | --    |
| Sal109                           | 14-003-2578 | Manno           | 127 | G1 | 0.948 | G1.1 | 0.948 | 0.948 | 0.052 | 0.881 | 0.119 | --    | --    |
| Triacca                          | 14-003-2516 | Aubonne         | 127 | G1 | 0.948 | G1.1 | 0.948 | 0.948 | 0.052 | 0.881 | 0.119 | --    | --    |
| Sal71                            | 14-003-2554 | Manno           | 128 | G1 | 0.966 | G1.1 | 0.971 | 0.966 | 0.034 | 0.971 | 0.029 | --    | --    |
| unknown                          | 14-003-1453 | Büron           | 128 | G1 | 0.966 | G1.1 | 0.971 | 0.966 | 0.034 | 0.971 | 0.029 | --    | --    |
| Williams' Bon Chretien           | Reference 8 | Uni Reading     | 128 | G1 | 0.966 | G1.1 | 0.971 | 0.966 | 0.034 | 0.971 | 0.029 | --    | --    |
| Pero Canonica                    | 14-003-2566 | Manno           | 129 | G1 | 0.973 | G1.1 | 0.973 | 0.973 | 0.027 | 0.922 | 0.078 | --    | --    |
| Pero Canonica 2                  | 14-003-2708 | Manno           | 129 | G1 | 0.973 | G1.1 | 0.973 | 0.973 | 0.027 | 0.922 | 0.078 | --    | --    |
| Beurrée grise                    | 14-003-1565 | Aclens          | 129 | G1 | 0.973 | G1.1 | 0.973 | 0.973 | 0.027 | 0.922 | 0.078 | --    | --    |

|                                |             |                 |     |    |       |      |       |       |       |       |       |       |       |
|--------------------------------|-------------|-----------------|-----|----|-------|------|-------|-------|-------|-------|-------|-------|-------|
| Deux soeurs                    | 14-003-1527 | Büron           | 129 | G1 | 0.973 | G1.1 | 0.973 | 0.973 | 0.027 | 0.922 | 0.078 | --    | --    |
| Doppelte Phillipsbirne         | 14-003-167  | Knonau          | 129 | G1 | 0.973 | G1.1 | 0.973 | 0.973 | 0.027 | 0.922 | 0.078 | --    | --    |
| Pero "chiappa"                 | 14-003-2704 | Manno           | 130 | G2 | 0.581 | G2.1 | 0.581 | 0.419 | 0.581 | --    | --    | 0.567 | 0.433 |
| Poire de fer                   | 14-003-1531 | Aclens          | 130 | G2 | 0.581 | G2.1 | 0.581 | 0.419 | 0.581 | --    | --    | 0.567 | 0.433 |
| Poire Loup                     | 14-003-372  | Aclens          | 130 | G2 | 0.581 | G2.1 | 0.581 | 0.419 | 0.581 | --    | --    | 0.567 | 0.433 |
| Poire à viande                 | 14-003-1539 | Aclens          | 130 | G2 | 0.581 | G2.1 | 0.581 | 0.419 | 0.581 | --    | --    | 0.567 | 0.433 |
| Poire de Livre?                | 14-003-1160 | Aclens          | 130 | G2 | 0.581 | G2.1 | 0.581 | 0.419 | 0.581 | --    | --    | 0.567 | 0.433 |
| Poire-Livre                    | 14-003-369  | Pierre-à-bot    | 130 | G2 | 0.581 | G2.1 | 0.581 | 0.419 | 0.581 | --    | --    | 0.567 | 0.433 |
| Poire Loup                     | 14-003-2545 | Pierre-à-bot    | 130 | G2 | 0.581 | G2.1 | 0.581 | 0.419 | 0.581 | --    | --    | 0.567 | 0.433 |
| Poire à Viande                 | 14-003-645  | Pierre-à-bot    | 130 | G2 | 0.581 | G2.1 | 0.581 | 0.419 | 0.581 | --    | --    | 0.567 | 0.433 |
| Sürler                         | 14-003-731  | Roggwil Riedern | 131 | G2 | 0.977 | G2.2 | 0.977 | 0.023 | 0.977 | --    | --    | 0.273 | 0.727 |
| Guntershauser                  | 14-003-790  | Roggwil Riedern | 131 | G2 | 0.977 | G2.2 | 0.977 | 0.023 | 0.977 | --    | --    | 0.273 | 0.727 |
| unknown                        | 14-003-809  | Roggwil Riedern | 131 | G2 | 0.977 | G2.2 | 0.977 | 0.023 | 0.977 | --    | --    | 0.273 | 0.727 |
| Imbler                         | 14-003-1427 | Büron           | 131 | G2 | 0.977 | G2.2 | 0.977 | 0.023 | 0.977 | --    | --    | 0.273 | 0.727 |
| Teigbirne                      | 14-003-1070 | Büron           | 131 | G2 | 0.977 | G2.2 | 0.977 | 0.023 | 0.977 | --    | --    | 0.273 | 0.727 |
| Teigbirne                      | 14-003-1038 | Roggwil Riedern | 132 | G2 | 0.909 | G2.2 | 0.909 | 0.091 | 0.909 | --    | --    | 0.308 | 0.692 |
| Tiroler                        | 14-003-801  | Roggwil Riedern | 132 | G2 | 0.909 | G2.2 | 0.909 | 0.091 | 0.909 | --    | --    | 0.308 | 0.692 |
| Fleischbirne                   | 14-003-827  | Roggwil Riedern | 132 | G2 | 0.909 | G2.2 | 0.909 | 0.091 | 0.909 | --    | --    | 0.308 | 0.692 |
| Welschbärtler                  | 14-003-878  | Roggwil Riedern | 132 | G2 | 0.909 | G2.2 | 0.909 | 0.091 | 0.909 | --    | --    | 0.308 | 0.692 |
| Spieslerbirne                  | 14-003-716  | Roggwil Riedern | 132 | G2 | 0.909 | G2.2 | 0.909 | 0.091 | 0.909 | --    | --    | 0.308 | 0.692 |
| Fleischbirne                   | 14-003-904  | Roggwil Riedern | 132 | G2 | 0.909 | G2.2 | 0.909 | 0.091 | 0.909 | --    | --    | 0.308 | 0.692 |
| Bärikerbirne                   | 14-003-27   | Höri            | 132 | G2 | 0.909 | G2.2 | 0.909 | 0.091 | 0.909 | --    | --    | 0.308 | 0.692 |
| Kleine Wasserbirne             | 14-003-1334 | Koppigen        | 132 | G2 | 0.909 | G2.2 | 0.909 | 0.091 | 0.909 | --    | --    | 0.308 | 0.692 |
| unknown                        | 14-003-1092 | Koppigen        | 132 | G2 | 0.909 | G2.2 | 0.909 | 0.091 | 0.909 | --    | --    | 0.308 | 0.692 |
| Bärikerbirne                   | 14-003-27   | Roggwil Hofen   | 132 | G2 | 0.909 | G2.2 | 0.909 | 0.091 | 0.909 | --    | --    | 0.308 | 0.692 |
| Bärikerbirne                   | 14-003-27   | Aubonne         | 132 | G2 | 0.909 | G2.2 | 0.909 | 0.091 | 0.909 | --    | --    | 0.308 | 0.692 |
| Zwiebelbirne                   | 14-003-698  | Pierre-à-bot    | 132 | G2 | 0.909 | G2.2 | 0.909 | 0.091 | 0.909 | --    | --    | 0.308 | 0.692 |
| Züribirne                      | 14-003-1396 | Baden           | 132 | G2 | 0.909 | G2.2 | 0.909 | 0.091 | 0.909 | --    | --    | 0.308 | 0.692 |
| Züribirne Typ 2                | 14-003-696  | Baden           | 132 | G2 | 0.909 | G2.2 | 0.909 | 0.091 | 0.909 | --    | --    | 0.308 | 0.692 |
| Vater                          | 14-003-792  | Büron           | 132 | G2 | 0.909 | G2.2 | 0.909 | 0.091 | 0.909 | --    | --    | 0.308 | 0.692 |
| Tirolerbirne                   | 14-003-958  | Büron           | 132 | G2 | 0.909 | G2.2 | 0.909 | 0.091 | 0.909 | --    | --    | 0.308 | 0.692 |
| Späckbire                      | 14-003-1039 | Büron           | 132 | G2 | 0.909 | G2.2 | 0.909 | 0.091 | 0.909 | --    | --    | 0.308 | 0.692 |
| Fleischbirne                   | 14-003-904  | Büron           | 132 | G2 | 0.909 | G2.2 | 0.909 | 0.091 | 0.909 | --    | --    | 0.308 | 0.692 |
| Tiroler                        | 14-003-963  | Büron           | 132 | G2 | 0.909 | G2.2 | 0.909 | 0.091 | 0.909 | --    | --    | 0.308 | 0.692 |
| Niederländer Birnen            | 14-003-1423 | Roggwil Riedern | 133 | G2 | 0.960 | G2.1 | 0.960 | 0.040 | 0.960 | --    | --    | 0.957 | 0.043 |
| Landsknechtler                 | 14-003-352  | Roggwil Riedern | 133 | G2 | 0.960 | G2.1 | 0.960 | 0.040 | 0.960 | --    | --    | 0.957 | 0.043 |
| Glögger                        | 14-003-804  | Roggwil Riedern | 133 | G2 | 0.960 | G2.1 | 0.960 | 0.040 | 0.960 | --    | --    | 0.957 | 0.043 |
| Fleischbirne                   | 14-003-828  | Roggwil Riedern | 133 | G2 | 0.960 | G2.1 | 0.960 | 0.040 | 0.960 | --    | --    | 0.957 | 0.043 |
| Landsknechtler                 | 14-003-888  | Roggwil Hofen   | 133 | G2 | 0.960 | G2.1 | 0.960 | 0.040 | 0.960 | --    | --    | 0.957 | 0.043 |
| Längler                        | 14-003-3669 | Roggwil Hofen   | 133 | G2 | 0.960 | G2.1 | 0.960 | 0.040 | 0.960 | --    | --    | 0.957 | 0.043 |
| Rotlängler Dornbirne           | 14-003-526  | Baden           | 133 | G2 | 0.960 | G2.1 | 0.960 | 0.040 | 0.960 | --    | --    | 0.957 | 0.043 |
| Rotlängler                     | 14-003-1421 | Baden           | 133 | G2 | 0.960 | G2.1 | 0.960 | 0.040 | 0.960 | --    | --    | 0.957 | 0.043 |
| Landsknechtler                 | 14-003-888  | Büron           | 133 | G2 | 0.960 | G2.1 | 0.960 | 0.040 | 0.960 | --    | --    | 0.957 | 0.043 |
| Dörrbirne                      | 14-003-824  | Büron           | 133 | G2 | 0.960 | G2.1 | 0.960 | 0.040 | 0.960 | --    | --    | 0.957 | 0.043 |
| Kilbibirnen                    | 14-003-755  | Roggwil Riedern | 134 | G2 | 0.979 | G2.2 | 0.979 | 0.021 | 0.979 | --    | --    | 0.382 | 0.618 |
| Schutzbirne                    | 14-003-561  | Roggwil Hofen   | 134 | G2 | 0.979 | G2.2 | 0.979 | 0.021 | 0.979 | --    | --    | 0.382 | 0.618 |
| Welschbirne                    | 14-003-924  | Büron           | 134 | G2 | 0.979 | G2.2 | 0.979 | 0.021 | 0.979 | --    | --    | 0.382 | 0.618 |
| Strohbirli                     | 14-003-981  | Büron           | 134 | G2 | 0.979 | G2.2 | 0.979 | 0.021 | 0.979 | --    | --    | 0.382 | 0.618 |
| Fuchsbirne                     | 14-003-842  | Büron           | 134 | G2 | 0.979 | G2.2 | 0.979 | 0.021 | 0.979 | --    | --    | 0.382 | 0.618 |
| Feigenbirne                    | 14-003-882  | Büron           | 134 | G2 | 0.979 | G2.2 | 0.979 | 0.021 | 0.979 | --    | --    | 0.382 | 0.618 |
| Luzerner Weissbirne            | 14-003-789  | Roggwil Riedern | 135 | G2 | 0.556 | G2.1 | 0.556 | 0.444 | 0.556 | --    | --    | 0.534 | 0.466 |
| Glockenbirne                   | 14-003-1014 | Roggwil Riedern | 135 | G2 | 0.556 | G2.1 | 0.556 | 0.444 | 0.556 | --    | --    | 0.534 | 0.466 |
| Teigbirne                      | 14-003-526  | Roggwil Riedern | 136 | G1 | 0.951 | G1.2 | 0.951 | 0.951 | 0.049 | 0.052 | 0.948 | --    | --    |
| Amanlis Butterbirne            | 14-003-720  | Roggwil Riedern | 136 | G1 | 0.951 | G1.2 | 0.951 | 0.951 | 0.049 | 0.052 | 0.948 | --    | --    |
| Chriesibirne                   | 14-003-875  | Roggwil Riedern | 137 | G2 | 0.696 | G2.1 | 0.696 | 0.304 | 0.696 | --    | --    | 0.505 | 0.495 |
| Langstieler                    | 14-003-356  | Roggwil Hofen   | 137 | G2 | 0.696 | G2.1 | 0.696 | 0.304 | 0.696 | --    | --    | 0.505 | 0.495 |
| Krummstieler                   | 14-003-345  | Aubonne         | 137 | G2 | 0.696 | G2.1 | 0.696 | 0.304 | 0.696 | --    | --    | 0.505 | 0.495 |
| Chriesibirne                   | 14-003-921  | Büron           | 137 | G2 | 0.696 | G2.1 | 0.696 | 0.304 | 0.696 | --    | --    | 0.505 | 0.495 |
| Appenzeller Langstieler        | 14-003-19   | privat          | 137 | G2 | 0.696 | G2.1 | 0.696 | 0.304 | 0.696 | --    | --    | 0.505 | 0.495 |
| Appenzeller Langstieler        | 14-003-19   | privat          | 137 | G2 | 0.696 | G2.1 | 0.696 | 0.304 | 0.696 | --    | --    | 0.505 | 0.495 |
| Juxbirne                       | 14-003-909  | Büron           | 138 | G1 | 0.826 | G1.2 | 0.970 | 0.826 | 0.174 | 0.030 | 0.970 | --    | --    |
| unknown                        | 14-003-1473 | Büron           | 138 | G1 | 0.826 | G1.2 | 0.970 | 0.826 | 0.174 | 0.030 | 0.970 | --    | --    |
| Zitronenbirne                  | 14-003-688  | Roggwil Hofen   | 139 | G1 | 0.895 | G1.2 | 0.970 | 0.895 | 0.105 | 0.030 | 0.970 | --    | --    |
| Oberösterreichischer Weinbirne | 14-003-434  | Höri            | 139 | G1 | 0.895 | G1.2 | 0.970 | 0.895 | 0.105 | 0.030 | 0.970 | --    | --    |
| Amisberger                     | 14-003-1374 | Baden           | 140 | G2 | 0.806 | G2.1 | 0.806 | 0.194 | 0.806 | --    | --    | 0.513 | 0.487 |
| Tropfbirne                     | 14-003-956  | Büron           | 140 | G2 | 0.806 | G2.1 | 0.806 | 0.194 | 0.806 | --    | --    | 0.513 | 0.487 |
| Grünmöstler                    | 14-003-273  | Roggwil Hofen   | 141 | G2 | 0.889 | G2.2 | 0.889 | 0.111 | 0.889 | --    | --    | 0.367 | 0.633 |
| Weinbirne                      | 14-003-1057 | Baden           | 141 | G2 | 0.889 | G2.2 | 0.889 | 0.111 | 0.889 | --    | --    | 0.367 | 0.633 |
| Wettinger Holzbirne            | 14-003-668  | Baden           | 141 | G2 | 0.889 | G2.2 | 0.889 | 0.111 | 0.889 | --    | --    | 0.367 | 0.633 |
| Züribieter                     | 14-003-1001 | Büron           | 141 | G2 | 0.889 | G2.2 | 0.889 | 0.111 | 0.889 | --    | --    | 0.367 | 0.633 |
| Fricktaler                     | 14-003-1382 | Büron           | 141 | G2 | 0.889 | G2.2 | 0.889 | 0.111 | 0.889 | --    | --    | 0.367 | 0.633 |
| Heulampen grosser Typ          | 14-003-1581 | Roggwil Hofen   | 142 | G2 | 0.966 | G2.1 | 0.966 | 0.034 | 0.966 | --    | --    | 0.850 | 0.150 |
| Heilemben                      | 14-003-951  | Büron           | 142 | G2 | 0.966 | G2.1 | 0.966 | 0.034 | 0.966 | --    | --    | 0.850 | 0.150 |
| Poire Plat                     | 14-003-469  | Aubonne         | 143 | G1 | 0.958 | G1.2 | 0.958 | 0.958 | 0.042 | 0.075 | 0.925 | --    | --    |
| Poire Pipe                     | 14-003-467  | Pierre-à-bot    | 143 | G1 | 0.958 | G1.2 | 0.958 | 0.958 | 0.042 | 0.075 | 0.925 | --    | --    |
| Poire Plat                     | 14-003-469  | Pierre-à-bot    | 143 | G1 | 0.958 | G1.2 | 0.958 | 0.958 | 0.042 | 0.075 | 0.925 | --    | --    |
| Bratbirne von Versoix          | 14-003-78   | Aubonne         | 144 | G1 | 0.755 | G1.2 | 0.978 | 0.755 | 0.245 | 0.022 | 0.978 | --    | --    |
| Saint-Laurent                  | 14-003-1573 | Aclens          | 144 | G1 | 0.755 | G1.2 | 0.978 | 0.755 | 0.245 | 0.022 | 0.978 | --    | --    |
| Poire Saint-Laurent II         | 14-003-1158 | Aclens          | 144 | G1 | 0.755 | G1.2 | 0.978 | 0.755 | 0.245 | 0.022 | 0.978 | --    | --    |
| St-Laurent                     | 14-003-1566 | Aclens          | 144 | G1 | 0.755 | G1.2 | 0.978 | 0.755 | 0.245 | 0.022 | 0.978 | --    | --    |
| Poire Blèque                   | 14-003-62   | Pierre-à-bot    | 144 | G1 | 0.755 | G1.2 | 0.978 | 0.755 | 0.245 | 0.022 | 0.978 | --    | --    |
| Poire Channe                   | 14-003-112  | Pierre-à-bot    | 144 | G1 | 0.755 | G1.2 | 0.978 | 0.755 | 0.245 | 0.022 | 0.978 | --    | --    |
| Poire Saint-Laurent            | 14-003-543  | Pierre-à-bot    | 144 | G1 | 0.755 | G1.2 | 0.978 | 0.755 | 0.245 | 0.022 | 0.978 | --    | --    |
| Löhniger Mehlbirne             | 14-003-370  | Pierre-à-bot    | 145 | G2 | 0.966 | G2.1 | 0.966 | 0.034 | 0.966 | --    | --    | 0.628 | 0.372 |
| Falsche Luise                  | 14-003-1363 | Büron           | 145 | G2 | 0.966 | G2.1 | 0.966 | 0.034 | 0.966 | --    | --    | 0.628 | 0.372 |
| Poire San-Règle                | 14-003-548  | Pierre-à-bot    | 146 | G1 | 0.608 | G1.2 | 0.910 | 0.608 | 0.392 | 0.090 | 0.910 | --    | --    |
| Poire Surègle                  | 14-003-613  | Pierre-à-bot    | 146 | G1 | 0.608 | G1.2 | 0.910 | 0.608 | 0.392 | 0.090 | 0.910 | --    | --    |



|                                   |             |                 |     |    |       |      |       |       |       |       |       |       |       |
|-----------------------------------|-------------|-----------------|-----|----|-------|------|-------|-------|-------|-------|-------|-------|-------|
| Weihnachtsbirne / Hardenpont      | 14-003-1036 | Baden           | 147 | G1 | 0.975 | G1.1 | 0.975 | 0.975 | 0.025 | 0.973 | 0.027 | --    | --    |
| Rietwiser                         | 14-003-1073 | Baden           | 147 | G1 | 0.975 | G1.1 | 0.975 | 0.975 | 0.025 | 0.973 | 0.027 | --    | --    |
| Boncristián                       | 14-003-2587 | Manno           | 148 | G2 | 0.702 | G2.1 | 0.702 | 0.298 | 0.702 | --    | --    | 0.579 | 0.421 |
| Boncristián                       | 14-003-2587 | Manno           | 148 | G2 | 0.702 | G2.1 | 0.702 | 0.298 | 0.702 | --    | --    | 0.579 | 0.421 |
| Bon Cristian                      | 14-003-1520 | Büron           | 148 | G2 | 0.702 | G2.1 | 0.702 | 0.298 | 0.702 | --    | --    | 0.579 | 0.421 |
| Wasserbirne                       | 14-003-653  | Nuclear stock   | 149 | G2 | 0.802 | G2.1 | 0.802 | 0.198 | 0.802 | --    | --    | 0.547 | 0.453 |
| Erdhauser                         | 14-003-193  | Roggwil Hofen   | 149 | G2 | 0.802 | G2.1 | 0.802 | 0.198 | 0.802 | --    | --    | 0.547 | 0.453 |
| Grosse Wasserbirne von Chailly    | 14-003-264  | Aubonne         | 149 | G2 | 0.802 | G2.1 | 0.802 | 0.198 | 0.802 | --    | --    | 0.547 | 0.453 |
| Wettingerbirne                    | 14-003-2519 | Aubonne         | 149 | G2 | 0.802 | G2.1 | 0.802 | 0.198 | 0.802 | --    | --    | 0.547 | 0.453 |
| Poire Maude                       | 14-003-397  | Pierre-à-bot    | 149 | G2 | 0.802 | G2.1 | 0.802 | 0.198 | 0.802 | --    | --    | 0.547 | 0.453 |
| Poire Rouge                       | 14-003-1132 | Pierre-à-bot    | 149 | G2 | 0.802 | G2.1 | 0.802 | 0.198 | 0.802 | --    | --    | 0.547 | 0.453 |
| Wurlitzer                         | 14-003-1015 | Baden           | 149 | G2 | 0.802 | G2.1 | 0.802 | 0.198 | 0.802 | --    | --    | 0.547 | 0.453 |
| Portamenter                       | 14-003-473  | Baden           | 149 | G2 | 0.802 | G2.1 | 0.802 | 0.198 | 0.802 | --    | --    | 0.547 | 0.453 |
| Beihäusler                        | 14-003-1394 | Büron           | 149 | G2 | 0.802 | G2.1 | 0.802 | 0.198 | 0.802 | --    | --    | 0.547 | 0.453 |
| unknown                           | 14-003-1415 | Büron           | 149 | G2 | 0.802 | G2.1 | 0.802 | 0.198 | 0.802 | --    | --    | 0.547 | 0.453 |
| Butterbirne                       | 14-003-901  | Büron           | 149 | G2 | 0.802 | G2.1 | 0.802 | 0.198 | 0.802 | --    | --    | 0.547 | 0.453 |
| Vifisbirne                        | 14-003-210  | Dürrenäsch      | 149 | G2 | 0.802 | G2.1 | 0.802 | 0.198 | 0.802 | --    | --    | 0.547 | 0.453 |
| Eisenbirne                        | 14-003-1063 | Roggwil Riedern | 150 | G2 | 0.853 | G2.2 | 0.853 | 0.147 | 0.853 | --    | --    | 0.419 | 0.581 |
| Späte Weinbirne                   | 14-003-586  | Roggwil Hofen   | 150 | G2 | 0.853 | G2.2 | 0.853 | 0.147 | 0.853 | --    | --    | 0.419 | 0.581 |
| Verte de Dully                    | 14-003-2517 | Aclens          | 150 | G2 | 0.853 | G2.2 | 0.853 | 0.147 | 0.853 | --    | --    | 0.419 | 0.581 |
| unknown                           | 14-003-1494 | Büron           | 150 | G2 | 0.853 | G2.2 | 0.853 | 0.147 | 0.853 | --    | --    | 0.419 | 0.581 |
| unbekannte Mostbirne              | 14-003-946  | Büron           | 150 | G2 | 0.853 | G2.2 | 0.853 | 0.147 | 0.853 | --    | --    | 0.419 | 0.581 |
| Gunteschhuser                     | 14-003-880  | Büron           | 150 | G2 | 0.853 | G2.2 | 0.853 | 0.147 | 0.853 | --    | --    | 0.419 | 0.581 |
| unknown                           | 14-003-1454 | Büron           | 151 | G1 | 0.956 | G1.1 | 0.956 | 0.956 | 0.044 | 0.857 | 0.143 | --    | --    |
| Heubirne                          | 14-003-815  | Büron           | 151 | G1 | 0.956 | G1.1 | 0.956 | 0.956 | 0.044 | 0.857 | 0.143 | --    | --    |
| Heubirne                          | 14-003-784  | Büron           | 151 | G1 | 0.956 | G1.1 | 0.956 | 0.956 | 0.044 | 0.857 | 0.143 | --    | --    |
| Hingeli                           | 14-003-539  | Baden           | 152 | G2 | 0.505 | G2.2 | 0.798 | 0.495 | 0.505 | --    | --    | 0.202 | 0.798 |
| Studenweider                      | 14-003-983  | Büron           | 152 | G2 | 0.505 | G2.2 | 0.798 | 0.495 | 0.505 | --    | --    | 0.202 | 0.798 |
| Hasenbirne                        | 14-003-3671 | Roggwil Hofen   | 153 | G2 | 0.981 | G2.2 | 0.981 | 0.019 | 0.981 | --    | --    | 0.067 | 0.933 |
| Chriesibirne                      | 14-003-794  | Büron           | 153 | G2 | 0.981 | G2.2 | 0.981 | 0.019 | 0.981 | --    | --    | 0.067 | 0.933 |
| Pero grande destra                | 14-003-2699 | Manno           | 154 | G1 | 0.977 | G1.1 | 0.978 | 0.977 | 0.023 | 0.978 | 0.022 | --    | --    |
| Fedant                            | 14-003-1383 | Roggwil Riedern | 154 | G1 | 0.977 | G1.1 | 0.978 | 0.977 | 0.023 | 0.978 | 0.022 | --    | --    |
| Saure Theilersbirne / Riedwiser ? | 14-003-1022 | Roggwil Riedern | 155 | G2 | 0.982 | G2.2 | 0.982 | 0.018 | 0.982 | --    | --    | 0.081 | 0.919 |
| unknown                           | 14-003-1086 | Baden           | 155 | G2 | 0.982 | G2.2 | 0.982 | 0.018 | 0.982 | --    | --    | 0.081 | 0.919 |
| Zuckerbirne                       | 14-003-1388 | Roggwil Riedern | 156 | G2 | 0.971 | G2.2 | 0.971 | 0.029 | 0.971 | --    | --    | 0.298 | 0.702 |
| Speckbirne                        | 14-003-907  | Büron           | 156 | G2 | 0.971 | G2.2 | 0.971 | 0.029 | 0.971 | --    | --    | 0.298 | 0.702 |
| Goldbirnen                        | 14-003-733  | Roggwil Riedern | 157 | G2 | 0.923 | G2.2 | 0.923 | 0.077 | 0.923 | --    | --    | 0.127 | 0.873 |
| Eierbirne                         | 14-003-835  | Roggwil Riedern | 157 | G2 | 0.923 | G2.2 | 0.923 | 0.077 | 0.923 | --    | --    | 0.127 | 0.873 |
| Stielbirne / Grosse Roggenbirne   | 14-003-1408 | Roggwil Riedern | 158 | G2 | 0.987 | G2.2 | 0.987 | 0.013 | 0.987 | --    | --    | 0.101 | 0.899 |
| Freulerbirne                      | 14-003-735  | Roggwil Riedern | 158 | G2 | 0.987 | G2.2 | 0.987 | 0.013 | 0.987 | --    | --    | 0.101 | 0.899 |
| Poire de Moisson                  | 14-003-1502 | Aclens          | 158 | G2 | 0.987 | G2.2 | 0.987 | 0.013 | 0.987 | --    | --    | 0.101 | 0.899 |
| Weinbirne                         | 14-003-813  | Roggwil Riedern | 159 | G2 | 0.942 | G2.1 | 0.942 | 0.058 | 0.942 | --    | --    | 0.809 | 0.191 |
| Chriesibirne                      | 14-003-889  | Büron           | 159 | G2 | 0.942 | G2.1 | 0.942 | 0.058 | 0.942 | --    | --    | 0.809 | 0.191 |
| Petersbirne                       | 14-003-2722 | Roggwil Hofen   | 160 | G1 | 0.845 | G1.2 | 0.860 | 0.845 | 0.155 | 0.140 | 0.860 | --    | --    |
| Augustbirne                       | 14-003-282  | Baden           | 160 | G1 | 0.845 | G1.2 | 0.860 | 0.845 | 0.155 | 0.140 | 0.860 | --    | --    |
| Heubirne                          | 14-003-760  | Büron           | 160 | G1 | 0.845 | G1.2 | 0.860 | 0.845 | 0.155 | 0.140 | 0.860 | --    | --    |
| Magdalenen                        | 14-003-881  | Büron           | 160 | G1 | 0.845 | G1.2 | 0.860 | 0.845 | 0.155 | 0.140 | 0.860 | --    | --    |
| Herbstlängelen                    | 14-003-761  | Roggwil Riedern | 161 | G2 | 0.981 | G2.1 | 0.981 | 0.019 | 0.981 | --    | --    | 0.942 | 0.058 |
| Herbstlängler                     | 14-003-768  | Roggwil Riedern | 161 | G2 | 0.981 | G2.1 | 0.981 | 0.019 | 0.981 | --    | --    | 0.942 | 0.058 |
| Herbstlängler                     | 14-003-299  | Roggwil Hofen   | 161 | G2 | 0.981 | G2.1 | 0.981 | 0.019 | 0.981 | --    | --    | 0.942 | 0.058 |
| General von Coligny               | 14-003-240  | Aclens          | 161 | G2 | 0.981 | G2.1 | 0.981 | 0.019 | 0.981 | --    | --    | 0.942 | 0.058 |
| Herbstlängeln                     | 14-003-890  | Büron           | 161 | G2 | 0.981 | G2.1 | 0.981 | 0.019 | 0.981 | --    | --    | 0.942 | 0.058 |
| Grünbirne                         | 14-003-823  | Roggwil Riedern | 162 | G2 | 0.945 | G2.2 | 0.945 | 0.055 | 0.945 | --    | --    | 0.250 | 0.750 |
| Rotkeller                         | 14-003-884  | Büron           | 162 | G2 | 0.945 | G2.2 | 0.945 | 0.055 | 0.945 | --    | --    | 0.250 | 0.750 |
| Flaschenbirne                     | 14-003-826  | Roggwil Riedern | 163 | G2 | 0.954 | G2.2 | 0.954 | 0.046 | 0.954 | --    | --    | 0.326 | 0.674 |
| Lederbirne                        | 14-003-1353 | Koppigen        | 163 | G2 | 0.954 | G2.2 | 0.954 | 0.046 | 0.954 | --    | --    | 0.326 | 0.674 |
| Chrisibirne                       | 14-003-782  | Büron           | 163 | G2 | 0.954 | G2.2 | 0.954 | 0.046 | 0.954 | --    | --    | 0.326 | 0.674 |
| Worglibiere                       | 14-003-1278 | Koppigen        | 164 | G2 | 0.963 | G2.1 | 0.963 | 0.037 | 0.963 | --    | --    | 0.927 | 0.073 |
| Pfundbirne                        | 14-003-1344 | Koppigen        | 164 | G2 | 0.963 | G2.1 | 0.963 | 0.037 | 0.963 | --    | --    | 0.927 | 0.073 |
| Heubirne                          | 14-003-1266 | Koppigen        | 165 | G2 | 0.829 | G2.1 | 0.829 | 0.171 | 0.829 | --    | --    | 0.803 | 0.197 |
| Zuckerbirne / Hanslibirne         | 14-003-1093 | Koppigen        | 165 | G2 | 0.829 | G2.1 | 0.829 | 0.171 | 0.829 | --    | --    | 0.803 | 0.197 |
| Wörger                            | 14-003-1227 | Koppigen        | 166 | G2 | 0.851 | G2.1 | 0.851 | 0.149 | 0.851 | --    | --    | 0.824 | 0.176 |
| Aermelbirne                       | 14-003-1345 | Koppigen        | 166 | G2 | 0.851 | G2.1 | 0.851 | 0.149 | 0.851 | --    | --    | 0.824 | 0.176 |
| Längler Kannenbirne               | 14-003-1253 | Koppigen        | 166 | G2 | 0.851 | G2.1 | 0.851 | 0.149 | 0.851 | --    | --    | 0.824 | 0.176 |
| Entenbirne                        | 14-003-1098 | Koppigen        | 167 | G2 | 0.912 | G2.1 | 0.912 | 0.088 | 0.912 | --    | --    | 0.909 | 0.091 |
| Sidebire                          | 14-003-1290 | Koppigen        | 167 | G2 | 0.912 | G2.1 | 0.912 | 0.088 | 0.912 | --    | --    | 0.909 | 0.091 |
| unknown                           | 14-003-1343 | Koppigen        | 167 | G2 | 0.912 | G2.1 | 0.912 | 0.088 | 0.912 | --    | --    | 0.909 | 0.091 |
| Coulliarde Etrangleuse            | 14-003-1280 | Koppigen        | 168 | G2 | 0.972 | G2.1 | 0.972 | 0.028 | 0.972 | --    | --    | 0.599 | 0.401 |
| Kannenbirne                       | 14-003-1239 | Büron           | 168 | G2 | 0.972 | G2.1 | 0.972 | 0.028 | 0.972 | --    | --    | 0.599 | 0.401 |
| Butterbirne                       | 14-003-1380 | Baden           | 169 | G1 | 0.981 | G1.1 | 0.981 | 0.981 | 0.019 | 0.958 | 0.042 | --    | --    |
| unknown                           | 14-003-1441 | Büron           | 169 | G1 | 0.981 | G1.1 | 0.981 | 0.981 | 0.019 | 0.958 | 0.042 | --    | --    |
| Guntershauser                     | 14-003-280  | Roggwil Hofen   | 170 | G1 | 0.890 | G1.2 | 0.969 | 0.890 | 0.110 | 0.031 | 0.969 | --    | --    |
| Poire Klettgauer Dornbirne        | 14-003-335  | Pierre-à-bot    | 170 | G1 | 0.890 | G1.2 | 0.969 | 0.890 | 0.110 | 0.031 | 0.969 | --    | --    |
| Schwarzrädler                     | 14-003-563  | Roggwil Hofen   | 171 | G2 | 0.960 | G2.1 | 0.960 | 0.040 | 0.960 | --    | --    | 0.526 | 0.474 |
| Schwarzrädler                     | 14-003-563  | Büron           | 171 | G2 | 0.960 | G2.1 | 0.960 | 0.040 | 0.960 | --    | --    | 0.526 | 0.474 |
| Julidechantsbirne                 | 14-003-325  | Roggwil Hofen   | 172 | G1 | 0.907 | G1.1 | 0.947 | 0.907 | 0.093 | 0.947 | 0.053 | --    | --    |
| Winterdiöle                       | 14-003-1226 | Baden           | 172 | G1 | 0.907 | G1.1 | 0.947 | 0.907 | 0.093 | 0.947 | 0.053 | --    | --    |
| Heubirli                          | 14-003-987  | Büron           | 172 | G1 | 0.907 | G1.1 | 0.947 | 0.907 | 0.093 | 0.947 | 0.053 | --    | --    |
| Julibirne                         | 14-003-839  | Büron           | 172 | G1 | 0.907 | G1.1 | 0.947 | 0.907 | 0.093 | 0.947 | 0.053 | --    | --    |
| Happerswiler                      | 14-003-289  | Roggwil Hofen   | 173 | G2 | 0.777 | G2.2 | 0.777 | 0.223 | 0.777 | --    | --    | 0.302 | 0.698 |
| Happerswiler                      | 14-003-289  | Baden           | 173 | G2 | 0.777 | G2.2 | 0.777 | 0.223 | 0.777 | --    | --    | 0.302 | 0.698 |
| Weissbirne                        | 14-003-781  | Büron           | 173 | G2 | 0.777 | G2.2 | 0.777 | 0.223 | 0.777 | --    | --    | 0.302 | 0.698 |
| Poire muscat Blessens             | 14-003-2522 | Aubonne         | 174 | G2 | 0.538 | G2.2 | 0.538 | 0.462 | 0.538 | --    | --    | 0.488 | 0.512 |
| Muscat                            | 14-003-1524 | Aclens          | 174 | G2 | 0.538 | G2.2 | 0.538 | 0.462 | 0.538 | --    | --    | 0.488 | 0.512 |
| Poire Muscat                      | 14-003-422  | Aclens          | 174 | G2 | 0.538 | G2.2 | 0.538 | 0.462 | 0.538 | --    | --    | 0.488 | 0.512 |
| Poire Mouchca                     | 14-003-417  | Pierre-à-bot    | 174 | G2 | 0.538 | G2.2 | 0.538 | 0.462 | 0.538 | --    | --    | 0.488 | 0.512 |
| Poire Muscat                      | 14-003-421  | Pierre-à-bot    | 174 | G2 | 0.538 | G2.2 | 0.538 | 0.462 | 0.538 | --    | --    | 0.488 | 0.512 |



|                          |             |                 |     |    |       |      |       |       |       |       |       |       |       |
|--------------------------|-------------|-----------------|-----|----|-------|------|-------|-------|-------|-------|-------|-------|-------|
| Gratsserbirne            | 14-003-1508 | Aclens          | 175 | G1 | 0.968 | G1.1 | 0.968 | 0.968 | 0.032 | 0.736 | 0.264 | --    | --    |
| Feigenbirne              | 14-003-1422 | Büron           | 175 | G1 | 0.968 | G1.1 | 0.968 | 0.968 | 0.032 | 0.736 | 0.264 | --    | --    |
| Holzerbirne              | 14-003-311  | Knonau          | 175 | G1 | 0.968 | G1.1 | 0.968 | 0.968 | 0.032 | 0.736 | 0.264 | --    | --    |
| unknown                  | 14-003-1078 | Baden           | 176 | G2 | 0.965 | G2.1 | 0.965 | 0.035 | 0.965 | --    | --    | 0.516 | 0.484 |
| Reinhözlzer              | 14-003-1390 | Büron           | 176 | G2 | 0.965 | G2.1 | 0.965 | 0.035 | 0.965 | --    | --    | 0.516 | 0.484 |
| Poire Cavouirou          | 14-003-105  | Pierre-à-bot    | 177 | G1 | 0.671 | G1.2 | 0.935 | 0.671 | 0.329 | 0.065 | 0.935 | --    | --    |
| Poire Gode               | 14-003-248  | Pierre-à-bot    | 177 | G1 | 0.671 | G1.2 | 0.935 | 0.671 | 0.329 | 0.065 | 0.935 | --    | --    |
| Poire Martignerin        | 14-003-394  | Pierre-à-bot    | 177 | G1 | 0.671 | G1.2 | 0.935 | 0.671 | 0.329 | 0.065 | 0.935 | --    | --    |
| Poire Recordon           | 14-003-494  | Pierre-à-bot    | 177 | G1 | 0.671 | G1.2 | 0.935 | 0.671 | 0.329 | 0.065 | 0.935 | --    | --    |
| Poire Verdan             | 14-003-639  | Pierre-à-bot    | 177 | G1 | 0.671 | G1.2 | 0.935 | 0.671 | 0.329 | 0.065 | 0.935 | --    | --    |
| Poire Verdet             | 14-003-640  | Pierre-à-bot    | 177 | G1 | 0.671 | G1.2 | 0.935 | 0.671 | 0.329 | 0.065 | 0.935 | --    | --    |
| Mailänder                | 14-003-1061 | Baden           | 178 | G2 | 0.738 | G2.1 | 0.880 | 0.262 | 0.738 | --    | --    | 0.880 | 0.120 |
| Deerbirne / Mehlbirne    | 14-003-1030 | Baden           | 178 | G2 | 0.738 | G2.1 | 0.880 | 0.262 | 0.738 | --    | --    | 0.880 | 0.120 |
| Poire Grumbirli          | 14-003-267  | Pierre-à-bot    | 179 | G2 | 0.674 | G2.2 | 0.674 | 0.326 | 0.674 | --    | --    | 0.366 | 0.634 |
| Poire à grande Queue     | 14-003-484  | Pierre-à-bot    | 179 | G2 | 0.674 | G2.2 | 0.674 | 0.326 | 0.674 | --    | --    | 0.366 | 0.634 |
| Stilbirne                | 14-003-1090 | Büron           | 179 | G2 | 0.674 | G2.2 | 0.674 | 0.326 | 0.674 | --    | --    | 0.366 | 0.634 |
| Poire Sept en gueule     | 14-003-571  | Pierre-à-bot    | 180 | G2 | 0.855 | G2.2 | 0.868 | 0.145 | 0.855 | --    | --    | 0.132 | 0.868 |
| Poire Sept-en-Gueule     | 14-003-1133 | Pierre-à-bot    | 180 | G2 | 0.855 | G2.2 | 0.868 | 0.145 | 0.855 | --    | --    | 0.132 | 0.868 |
| Thurgäuerli              | 14-003-808  | Roggwil Riedern | 181 | G2 | 0.536 | G2.1 | 0.536 | 0.464 | 0.536 | --    | --    | 0.507 | 0.493 |
| Thurgauer Weinbirne      | 14-003-780  | Roggwil Riedern | 181 | G2 | 0.536 | G2.1 | 0.536 | 0.464 | 0.536 | --    | --    | 0.507 | 0.493 |
| Thurgäuerli              | 14-003-856  | Büron           | 181 | G2 | 0.536 | G2.1 | 0.536 | 0.464 | 0.536 | --    | --    | 0.507 | 0.493 |
| unknown                  | 14-003-1341 | Koppigen        | 182 | G2 | 0.924 | G2.2 | 0.924 | 0.076 | 0.924 | --    | --    | 0.347 | 0.653 |
| Kleine Süsse             | 14-003-1099 | Koppigen        | 182 | G2 | 0.924 | G2.2 | 0.924 | 0.076 | 0.924 | --    | --    | 0.347 | 0.653 |
| Poire Rondatte           | 14-003-513  | Pierre-à-bot    | 183 | G2 | 0.825 | G2.1 | 0.825 | 0.175 | 0.825 | --    | --    | 0.528 | 0.472 |
| späte Weinbirne          | 14-003-1513 | Pierre-à-bot    | 183 | G2 | 0.825 | G2.1 | 0.825 | 0.175 | 0.825 | --    | --    | 0.528 | 0.472 |
| Dornbirne                | 14-003-773  | Büron           | 183 | G2 | 0.825 | G2.1 | 0.825 | 0.175 | 0.825 | --    | --    | 0.528 | 0.472 |
| Winterchristbirne        | 14-003-1247 | Roggwil Riedern | 184 | G2 | 0.867 | G2.2 | 0.867 | 0.133 | 0.867 | --    | --    | 0.462 | 0.538 |
| Mostbirne                | 14-003-1293 | Koppigen        | 184 | G2 | 0.867 | G2.2 | 0.867 | 0.133 | 0.867 | --    | --    | 0.462 | 0.538 |
| unknown                  | 14-003-1336 | Koppigen        | 184 | G2 | 0.867 | G2.2 | 0.867 | 0.133 | 0.867 | --    | --    | 0.462 | 0.538 |
| unknown                  | 14-003-1107 | Koppigen        | 184 | G2 | 0.867 | G2.2 | 0.867 | 0.133 | 0.867 | --    | --    | 0.462 | 0.538 |
| Bergamotte               | 14-003-1299 | Koppigen        | 184 | G2 | 0.867 | G2.2 | 0.867 | 0.133 | 0.867 | --    | --    | 0.462 | 0.538 |
| Vifisbirne               | 14-003-1269 | Koppigen        | 184 | G2 | 0.867 | G2.2 | 0.867 | 0.133 | 0.867 | --    | --    | 0.462 | 0.538 |
| Augustbirne              | 14-003-749  | Büron           | 185 | G1 | 0.954 | G1.1 | 0.954 | 0.954 | 0.046 | 0.843 | 0.157 | --    | --    |
| Heuerbirne               | 14-003-970  | Büron           | 185 | G1 | 0.954 | G1.1 | 0.954 | 0.954 | 0.046 | 0.843 | 0.157 | --    | --    |
| Bergamotte               | 14-003-954  | Baden           | 186 | G2 | 0.967 | G2.1 | 0.967 | 0.033 | 0.967 | --    | --    | 0.594 | 0.406 |
| Heubirne                 | 14-003-831  | Büron           | 186 | G2 | 0.967 | G2.1 | 0.967 | 0.033 | 0.967 | --    | --    | 0.594 | 0.406 |
| Poire Verte Codia        | 14-003-1120 | Pierre-à-bot    | 187 | G2 | 0.695 | G2.1 | 0.828 | 0.305 | 0.695 | --    | --    | 0.828 | 0.172 |
| Johannisbirne            | 14-003-1021 | Baden           | 187 | G2 | 0.695 | G2.1 | 0.828 | 0.305 | 0.695 | --    | --    | 0.828 | 0.172 |
| Birne Olivia Stoll       | -           | privat          | 188 | G2 | 0.959 | G2.1 | 0.959 | 0.041 | 0.959 | --    | --    | 0.949 | 0.051 |
| Brunnenbirne             | 14-003-1028 | Büron           | 189 | G1 | 0.698 | G1.2 | 0.967 | 0.698 | 0.302 | 0.033 | 0.967 | --    | --    |
| Legibirne                | 14-003-366  | Dürrenäsch      | 189 | G1 | 0.698 | G1.2 | 0.967 | 0.698 | 0.302 | 0.033 | 0.967 | --    | --    |
| Sal102                   | 14-003-2577 | Manno           | 190 | G1 | 0.960 | G1.2 | 0.960 | 0.960 | 0.040 | 0.104 | 0.896 | --    | --    |
| Precoci piccole          | 14-003-2555 | Manno           | 191 | G2 | 0.627 | G2.2 | 0.796 | 0.373 | 0.627 | --    | --    | 0.204 | 0.796 |
| Precoci grandi           | 14-003-2556 | Manno           | 192 | G2 | 0.847 | G2.1 | 0.847 | 0.153 | 0.847 | --    | --    | 0.570 | 0.430 |
| Pero Muzzano             | 14-003-2565 | Manno           | 193 | G1 | 0.954 | G1.1 | 0.954 | 0.954 | 0.046 | 0.934 | 0.066 | --    | --    |
| Pero Lugaggia            | 14-003-2561 | Manno           | 194 | G2 | 0.889 | G2.1 | 0.889 | 0.111 | 0.889 | --    | --    | 0.550 | 0.450 |
| Pero Bero bergamotto     | 14-003-2558 | Manno           | 195 | G2 | 0.585 | G2.2 | 0.616 | 0.415 | 0.585 | --    | --    | 0.384 | 0.616 |
| Pero piccolo             | 14-003-2559 | Manno           | 196 | G1 | 0.794 | G1.1 | 0.794 | 0.794 | 0.206 | 0.788 | 0.212 | --    | --    |
| Per rügin                | 14-003-2571 | Manno           | 197 | G1 | 0.534 | G1.1 | 0.651 | 0.534 | 0.466 | 0.651 | 0.349 | --    | --    |
| Sconosciuto prob. locale | 14-003-2579 | Manno           | 198 | G1 | 0.975 | G1.1 | 0.975 | 0.975 | 0.025 | 0.876 | 0.124 | --    | --    |
| Pero San Pietro          | 14-003-2572 | Manno           | 199 | G1 | 0.899 | G1.1 | 0.913 | 0.899 | 0.101 | 0.913 | 0.087 | --    | --    |
| Pero Regazzoli           | 14-003-2715 | Manno           | 200 | G1 | 0.868 | G1.2 | 0.868 | 0.868 | 0.132 | 0.265 | 0.735 | --    | --    |
| Pero Orizzonte           | 14-003-2716 | Manno           | 201 | G1 | 0.957 | G1.2 | 0.957 | 0.957 | 0.043 | 0.356 | 0.644 | --    | --    |
| Pero Breganzona          | 14-003-2563 | Manno           | 202 | G1 | 0.961 | G1.1 | 0.961 | 0.961 | 0.039 | 0.669 | 0.331 | --    | --    |
| Martin sec               | 14-003-2562 | Manno           | 203 | G1 | 0.745 | G1.2 | 0.966 | 0.745 | 0.255 | 0.034 | 0.966 | --    | --    |
| Piccole                  | 14-003-2557 | Manno           | 204 | G1 | 0.956 | G1.2 | 0.956 | 0.956 | 0.044 | 0.241 | 0.759 | --    | --    |
| Pero prato grande        | 14-003-2696 | Manno           | 205 | G1 | 0.922 | G1.2 | 0.922 | 0.922 | 0.078 | 0.177 | 0.823 | --    | --    |
| Pero Bironico            | 14-003-2711 | Manno           | 206 | G2 | 0.801 | G2.2 | 0.801 | 0.199 | 0.801 | --    | --    | 0.481 | 0.519 |
| Sconosciuto prob. locale | 14-003-2593 | Manno           | 207 | G2 | 0.803 | G2.2 | 0.803 | 0.197 | 0.803 | --    | --    | 0.418 | 0.582 |
| Sconosciuto prob. locale | 14-003-2591 | Manno           | 208 | G1 | 0.789 | G1.2 | 0.789 | 0.789 | 0.211 | 0.316 | 0.684 | --    | --    |
| Sconosciuto prob. locale | 14-003-2594 | Manno           | 209 | G1 | 0.981 | G1.1 | 0.981 | 0.981 | 0.019 | 0.976 | 0.024 | --    | --    |
| Brütt e bòn              | 14-003-2586 | Manno           | 210 | G1 | 0.804 | G1.2 | 0.964 | 0.804 | 0.196 | 0.036 | 0.964 | --    | --    |
| Sconosciuto prob. locale | 14-003-2582 | Manno           | 211 | G1 | 0.917 | G1.1 | 0.917 | 0.917 | 0.083 | 0.678 | 0.322 | --    | --    |
| Sconosciuto prob. locale | 14-003-2584 | Manno           | 212 | G1 | 0.967 | G1.2 | 0.967 | 0.967 | 0.033 | 0.470 | 0.530 | --    | --    |
| Pér de la Èma            | 14-003-2588 | Manno           | 213 | G1 | 0.833 | G1.1 | 0.833 | 0.833 | 0.167 | 0.735 | 0.265 | --    | --    |
| Sconosciuto locale       | 14-003-2581 | Manno           | 214 | G1 | 0.654 | G1.1 | 0.654 | 0.654 | 0.346 | 0.525 | 0.475 | --    | --    |
| Pero grande sinistra     | 14-003-2698 | Manno           | 215 | G1 | 0.963 | G1.2 | 0.963 | 0.963 | 0.037 | 0.328 | 0.672 | --    | --    |
| Pero a spagliera         | 14-003-2700 | Manno           | 216 | G1 | 0.952 | G1.1 | 0.952 | 0.952 | 0.048 | 0.939 | 0.061 | --    | --    |
| Pero burroso             | 14-003-2701 | Manno           | 217 | G1 | 0.971 | G1.1 | 0.971 | 0.971 | 0.029 | 0.961 | 0.039 | --    | --    |
| Tipo Sept en gueule      | 14-003-2702 | Manno           | 218 | G1 | 0.801 | G1.2 | 0.801 | 0.801 | 0.199 | 0.487 | 0.513 | --    | --    |
| Pero malnesso            | 14-003-2703 | Manno           | 219 | G1 | 0.665 | G1.1 | 0.716 | 0.665 | 0.335 | 0.716 | 0.284 | --    | --    |
| Pisò de la Biava         | 14-003-2713 | Manno           | 220 | G1 | 0.949 | G1.2 | 0.949 | 0.949 | 0.051 | 0.067 | 0.933 | --    | --    |
| Vernin                   | 14-003-2712 | Manno           | 221 | G1 | 0.829 | G1.2 | 0.829 | 0.829 | 0.171 | 0.448 | 0.552 | --    | --    |
| Pero romboidale          | 14-003-2705 | Manno           | 222 | G1 | 0.797 | G1.2 | 0.797 | 0.797 | 0.203 | 0.443 | 0.557 | --    | --    |
| Pero centenario          | 14-003-2707 | Manno           | 223 | G1 | 0.974 | G1.1 | 0.974 | 0.974 | 0.026 | 0.875 | 0.125 | --    | --    |
| Knollbirne               | 14-003-337  | Nuclear stock   | 224 | G2 | 0.856 | G2.2 | 0.856 | 0.144 | 0.856 | --    | --    | 0.144 | 0.856 |
| Wybirne                  | 14-003-738  | Roggwil Riedern | 225 | G1 | 0.550 | G1.2 | 0.672 | 0.550 | 0.450 | 0.328 | 0.672 | --    | --    |
| unknown                  | 14-003-1505 | Roggwil Riedern | 226 | G1 | 0.898 | G1.1 | 0.922 | 0.898 | 0.102 | 0.922 | 0.078 | --    | --    |
| Minister Dr. Lucius      | 14-003-406  | Roggwil Riedern | 227 | G1 | 0.796 | G1.1 | 0.932 | 0.796 | 0.204 | 0.932 | 0.068 | --    | --    |
| Regelbirne               | 14-003-1229 | Roggwil Riedern | 228 | G2 | 0.979 | G2.2 | 0.979 | 0.021 | 0.979 | --    | --    | 0.347 | 0.653 |
| Hasenbirli               | 14-003-721  | Roggwil Riedern | 229 | G1 | 0.691 | G1.2 | 0.691 | 0.691 | 0.309 | 0.329 | 0.671 | --    | --    |
| Gute Graue               | 14-003-703  | Roggwil Riedern | 230 | G2 | 0.879 | G2.2 | 0.879 | 0.121 | 0.879 | --    | --    | 0.231 | 0.769 |
| Müli Birne               | 14-003-709  | Roggwil Riedern | 231 | G2 | 0.643 | G2.1 | 0.662 | 0.357 | 0.643 | --    | --    | 0.662 | 0.338 |
| Weidbirli                | 14-003-1487 | Roggwil Riedern | 232 | G2 | 0.919 | G2.1 | 0.919 | 0.081 | 0.919 | --    | --    | 0.551 | 0.449 |
| Hungbirli                | 14-003-965  | Roggwil Riedern | 233 | G2 | 0.852 | G2.1 | 0.852 | 0.148 | 0.852 | --    | --    | 0.569 | 0.431 |
| Züribirne                | 14-003-1008 | Roggwil Riedern | 234 | G2 | 0.968 | G2.1 | 0.968 | 0.032 | 0.968 | --    | --    | 0.719 | 0.281 |
| Sürler                   | 14-003-1017 | Roggwil Riedern | 235 | G2 | 0.864 | G2.2 | 0.864 | 0.136 | 0.864 | --    | --    | 0.264 | 0.736 |

|                            |             |                 |     |    |       |      |       |       |       |       |       |       |       |
|----------------------------|-------------|-----------------|-----|----|-------|------|-------|-------|-------|-------|-------|-------|-------|
| Häsler                     | 14-003-1032 | Roggwil Riedern | 236 | G2 | 0.774 | G2.2 | 0.937 | 0.226 | 0.774 | --    | --    | 0.063 | 0.937 |
| Aglischerl                 | 14-003-1048 | Roggwil Riedern | 237 | G2 | 0.980 | G2.2 | 0.980 | 0.020 | 0.980 | --    | --    | 0.127 | 0.873 |
| Solaner                    | 14-003-1049 | Roggwil Riedern | 238 | G1 | 0.973 | G1.2 | 0.973 | 0.973 | 0.027 | 0.488 | 0.512 | --    | --    |
| Maria Magdalena            | 14-003-1064 | Roggwil Riedern | 239 | G1 | 0.718 | G1.2 | 0.970 | 0.718 | 0.282 | 0.030 | 0.970 | --    | --    |
| Chugelibire                | 14-003-1075 | Roggwil Riedern | 240 | G2 | 0.751 | G2.1 | 0.751 | 0.249 | 0.751 | --    | --    | 0.631 | 0.369 |
| unknown                    | 14-003-1081 | Roggwil Riedern | 241 | G1 | 0.975 | G1.1 | 0.975 | 0.975 | 0.025 | 0.974 | 0.026 | --    | --    |
| unknown                    | 14-003-1087 | Roggwil Riedern | 242 | G1 | 0.523 | G1.2 | 0.972 | 0.523 | 0.477 | 0.028 | 0.972 | --    | --    |
| Chäs Bire                  | 14-003-1112 | Roggwil Riedern | 243 | G1 | 0.983 | G1.2 | 0.983 | 0.983 | 0.017 | 0.114 | 0.886 | --    | --    |
| Butterbirne                | 14-003-1219 | Roggwil Riedern | 244 | G1 | 0.979 | G1.1 | 0.979 | 0.979 | 0.021 | 0.976 | 0.024 | --    | --    |
| Graubirne                  | 14-003-1235 | Roggwil Riedern | 245 | G2 | 0.940 | G2.2 | 0.940 | 0.060 | 0.940 | --    | --    | 0.347 | 0.653 |
| Kügelibire                 | 14-003-1265 | Roggwil Riedern | 246 | G1 | 0.955 | G1.1 | 0.955 | 0.955 | 0.045 | 0.907 | 0.093 | --    | --    |
| Rebenbirne                 | 14-003-1366 | Roggwil Riedern | 247 | G2 | 0.789 | G2.1 | 0.789 | 0.211 | 0.789 | --    | --    | 0.681 | 0.319 |
| Blutbirne                  | 14-003-1367 | Roggwil Riedern | 248 | G1 | 0.854 | G1.2 | 0.967 | 0.854 | 0.146 | 0.033 | 0.967 | --    | --    |
| Echte Dornbirne            | 14-003-1368 | Roggwil Riedern | 249 | G2 | 0.789 | G2.1 | 0.789 | 0.211 | 0.789 | --    | --    | 0.665 | 0.335 |
| Chogelibere                | 14-003-1369 | Roggwil Riedern | 250 | G1 | 0.916 | G1.1 | 0.916 | 0.916 | 0.084 | 0.877 | 0.123 | --    | --    |
| Mollebusch                 | 14-003-1370 | Roggwil Riedern | 251 | G1 | 0.831 | G1.1 | 0.831 | 0.831 | 0.169 | 0.766 | 0.234 | --    | --    |
| Müsler                     | 14-003-729  | Roggwil Riedern | 252 | G2 | 0.759 | G2.2 | 0.759 | 0.241 | 0.759 | --    | --    | 0.298 | 0.702 |
| Erntbirli                  | 14-003-1384 | Roggwil Riedern | 253 | G2 | 0.785 | G2.2 | 0.785 | 0.215 | 0.785 | --    | --    | 0.378 | 0.622 |
| Holzerbirne                | 14-003-1386 | Roggwil Riedern | 254 | G1 | 0.972 | G1.1 | 0.972 | 0.972 | 0.028 | 0.694 | 0.306 | --    | --    |
| Apothekerbirne             | 14-003-734  | Roggwil Riedern | 255 | G1 | 0.879 | G1.1 | 0.950 | 0.879 | 0.121 | 0.950 | 0.050 | --    | --    |
| Künstberli                 | 14-003-1397 | Roggwil Riedern | 256 | G2 | 0.883 | G2.2 | 0.883 | 0.117 | 0.883 | --    | --    | 0.251 | 0.749 |
| Rebbirne                   | 14-003-736  | Roggwil Riedern | 257 | G2 | 0.900 | G2.2 | 0.900 | 0.100 | 0.900 | --    | --    | 0.201 | 0.799 |
| Wiibeere                   | 14-003-1403 | Roggwil Riedern | 258 | G2 | 0.977 | G2.2 | 0.977 | 0.023 | 0.977 | --    | --    | 0.372 | 0.628 |
| Winterbirne                | 14-003-1406 | Roggwil Riedern | 259 | G2 | 0.957 | G2.1 | 0.957 | 0.043 | 0.957 | --    | --    | 0.579 | 0.421 |
| Zam Reiholzbirne           | 14-003-1407 | Roggwil Riedern | 260 | G2 | 0.957 | G2.2 | 0.957 | 0.043 | 0.957 | --    | --    | 0.386 | 0.614 |
| Späte Weinbirne            | 14-003-1426 | Roggwil Riedern | 261 | G2 | 0.968 | G2.2 | 0.968 | 0.032 | 0.968 | --    | --    | 0.357 | 0.643 |
| Zuckerbirne                | 14-003-1430 | Roggwil Riedern | 262 | G2 | 0.896 | G2.1 | 0.896 | 0.104 | 0.896 | --    | --    | 0.557 | 0.443 |
| Teigbirne                  | 14-003-1440 | Roggwil Riedern | 263 | G2 | 0.966 | G2.2 | 0.966 | 0.034 | 0.966 | --    | --    | 0.058 | 0.942 |
| Grüne Magdalener/Julibirne | 14-003-271  | Roggwil Riedern | 264 | G1 | 0.972 | G1.1 | 0.972 | 0.972 | 0.028 | 0.698 | 0.302 | --    | --    |
| Kollersbirne               | 14-003-745  | Roggwil Riedern | 265 | G1 | 0.965 | G1.1 | 0.966 | 0.965 | 0.035 | 0.966 | 0.034 | --    | --    |
| Gröler                     | 14-003-747  | Roggwil Riedern | 266 | G2 | 0.678 | G2.2 | 0.709 | 0.322 | 0.678 | --    | --    | 0.291 | 0.709 |
| Spätmöstler                | 14-003-748  | Roggwil Riedern | 267 | G2 | 0.879 | G2.1 | 0.879 | 0.121 | 0.879 | --    | --    | 0.756 | 0.244 |
| Hasenbirne                 | 14-003-290  | Roggwil Riedern | 268 | G1 | 0.976 | G1.2 | 0.976 | 0.976 | 0.024 | 0.104 | 0.896 | --    | --    |
| Happerswiler               | 14-003-751  | Roggwil Riedern | 269 | G2 | 0.945 | G2.1 | 0.945 | 0.055 | 0.945 | --    | --    | 0.598 | 0.402 |
| Rüthbirne                  | 14-003-756  | Roggwil Riedern | 270 | G2 | 0.958 | G2.2 | 0.958 | 0.042 | 0.958 | --    | --    | 0.273 | 0.727 |
| Grünbirne                  | 14-003-757  | Roggwil Riedern | 271 | G2 | 0.911 | G2.1 | 0.911 | 0.089 | 0.911 | --    | --    | 0.572 | 0.428 |
| Biessenhofer Mostbirne     | 14-003-58   | Roggwil Riedern | 272 | G2 | 0.824 | G2.2 | 0.824 | 0.176 | 0.824 | --    | --    | 0.306 | 0.694 |
| Gelbwiegler                | 14-003-236  | Roggwil Riedern | 273 | G2 | 0.705 | G2.2 | 0.867 | 0.295 | 0.705 | --    | --    | 0.133 | 0.867 |
| Julibirne                  | 14-003-767  | Roggwil Riedern | 274 | G1 | 0.968 | G1.1 | 0.968 | 0.968 | 0.032 | 0.837 | 0.163 | --    | --    |
| Sauerbirne                 | 14-003-769  | Roggwil Riedern | 275 | G2 | 0.938 | G2.2 | 0.938 | 0.062 | 0.938 | --    | --    | 0.177 | 0.823 |
| Butterbirne                | 14-003-770  | Roggwil Riedern | 276 | G1 | 0.971 | G1.1 | 0.978 | 0.971 | 0.029 | 0.978 | 0.022 | --    | --    |
| Ulmer Butterbirne          | 14-003-637  | Roggwil Riedern | 277 | G1 | 0.952 | G1.1 | 0.952 | 0.952 | 0.048 | 0.869 | 0.131 | --    | --    |
| Kollersbirne               | 14-003-340  | Roggwil Riedern | 278 | G2 | 0.957 | G2.1 | 0.957 | 0.043 | 0.957 | --    | --    | 0.877 | 0.123 |
| Chlausenbirne              | 14-003-718  | Roggwil Riedern | 279 | G1 | 0.915 | G1.1 | 0.967 | 0.915 | 0.085 | 0.967 | 0.033 | --    | --    |
| Zuckerbirne                | 14-003-786  | Roggwil Riedern | 280 | G1 | 0.980 | G1.1 | 0.986 | 0.980 | 0.020 | 0.986 | 0.014 | --    | --    |
| Trübler                    | 14-003-634  | Roggwil Riedern | 281 | G2 | 0.935 | G2.2 | 0.935 | 0.065 | 0.935 | --    | --    | 0.107 | 0.893 |
| Petersbirne                | 14-003-457  | Roggwil Riedern | 282 | G1 | 0.723 | G1.2 | 0.937 | 0.723 | 0.277 | 0.063 | 0.937 | --    | --    |
| Längler                    | 14-003-800  | Roggwil Riedern | 283 | G2 | 0.980 | G2.1 | 0.980 | 0.020 | 0.980 | --    | --    | 0.950 | 0.050 |
| Rotlängler Dörrbirne       | 14-003-526  | Roggwil Riedern | 284 | G2 | 0.940 | G2.1 | 0.940 | 0.060 | 0.940 | --    | --    | 0.633 | 0.367 |
| Strickbirne                | 14-003-601  | Roggwil Riedern | 285 | G2 | 0.942 | G2.2 | 0.942 | 0.058 | 0.942 | --    | --    | 0.314 | 0.686 |
| Römische Schmalzbirne      | 14-003-510  | Roggwil Riedern | 286 | G1 | 0.938 | G1.2 | 0.976 | 0.938 | 0.062 | 0.024 | 0.976 | --    | --    |
| unknown                    | 14-003-1460 | Roggwil Riedern | 287 | G1 | 0.980 | G1.2 | 0.980 | 0.980 | 0.020 | 0.030 | 0.970 | --    | --    |
| Müsler                     | 14-003-426  | Roggwil Riedern | 288 | G2 | 0.753 | G2.2 | 0.753 | 0.247 | 0.753 | --    | --    | 0.421 | 0.579 |
| Zuckerbirne                | 14-003-891  | Roggwil Riedern | 289 | G1 | 0.810 | G1.2 | 0.967 | 0.810 | 0.190 | 0.033 | 0.967 | --    | --    |
| Rietbirne                  | 14-003-1469 | Roggwil Riedern | 290 | G2 | 0.954 | G2.1 | 0.954 | 0.046 | 0.954 | --    | --    | 0.919 | 0.081 |
| unknown                    | 14-003-1470 | Roggwil Riedern | 291 | G2 | 0.928 | G2.2 | 0.928 | 0.072 | 0.928 | --    | --    | 0.158 | 0.842 |
| Frauenschinkel             | 14-003-1055 | Roggwil Riedern | 292 | G1 | 0.527 | G1.1 | 0.698 | 0.527 | 0.473 | 0.698 | 0.302 | --    | --    |
| unknown                    | 14-003-1434 | Roggwil Riedern | 293 | G2 | 0.976 | G2.2 | 0.976 | 0.024 | 0.976 | --    | --    | 0.408 | 0.592 |
| Julibirne                  | 14-003-713  | Roggwil Riedern | 294 | G1 | 0.705 | G1.2 | 0.965 | 0.705 | 0.295 | 0.035 | 0.965 | --    | --    |
| Zuckerbirne                | 14-003-754  | Roggwil Riedern | 295 | G2 | 0.957 | G2.2 | 0.957 | 0.043 | 0.957 | --    | --    | 0.415 | 0.585 |
| Bündnertrübla              | 14-003-771  | Roggwil Riedern | 296 | G2 | 0.923 | G2.1 | 0.923 | 0.077 | 0.923 | --    | --    | 0.634 | 0.366 |
| Weissbirne                 | 14-003-832  | Roggwil Riedern | 297 | G1 | 0.534 | G1.2 | 0.960 | 0.534 | 0.466 | 0.040 | 0.960 | --    | --    |
| Kuhbirne                   | 14-003-844  | Roggwil Riedern | 298 | G2 | 0.775 | G2.2 | 0.888 | 0.225 | 0.775 | --    | --    | 0.112 | 0.888 |
| Herrenbirne                | 14-003-848  | Roggwil Riedern | 299 | G2 | 0.884 | G2.1 | 0.884 | 0.116 | 0.884 | --    | --    | 0.572 | 0.428 |
| Böxler                     | 14-003-850  | Roggwil Riedern | 300 | G2 | 0.970 | G2.2 | 0.970 | 0.030 | 0.970 | --    | --    | 0.487 | 0.513 |
| Zimtbirne                  | 14-003-851  | Roggwil Riedern | 301 | G1 | 0.711 | G1.2 | 0.961 | 0.711 | 0.289 | 0.039 | 0.961 | --    | --    |
| unknown                    | 14-003-1461 | Roggwil Riedern | 302 | G1 | 0.983 | G1.1 | 0.988 | 0.983 | 0.017 | 0.988 | 0.012 | --    | --    |
| Vrenäbirä                  | 14-003-852  | Roggwil Riedern | 303 | G2 | 0.539 | G2.1 | 0.539 | 0.461 | 0.539 | --    | --    | 0.528 | 0.472 |
| Schutzbirne                | 14-003-3752 | Roggwil Riedern | 304 | G2 | 0.967 | G2.2 | 0.967 | 0.033 | 0.967 | --    | --    | 0.384 | 0.616 |
| Kugelbirne                 | 14-003-853  | Roggwil Riedern | 305 | G2 | 0.959 | G2.1 | 0.959 | 0.041 | 0.959 | --    | --    | 0.888 | 0.112 |
| Marxenbirne                | 14-003-396  | Roggwil Riedern | 306 | G2 | 0.974 | G2.1 | 0.974 | 0.026 | 0.974 | --    | --    | 0.860 | 0.140 |
| Rotholzbirne               | 14-003-855  | Roggwil Riedern | 307 | G2 | 0.966 | G2.2 | 0.966 | 0.034 | 0.966 | --    | --    | 0.362 | 0.638 |
| Helegger                   | 14-003-294  | Roggwil Riedern | 308 | G2 | 0.967 | G2.2 | 0.967 | 0.033 | 0.967 | --    | --    | 0.389 | 0.611 |
| Rebenbirne                 | 14-003-857  | Roggwil Riedern | 309 | G2 | 0.841 | G2.1 | 0.841 | 0.159 | 0.841 | --    | --    | 0.814 | 0.186 |
| Rothäfler                  | 14-003-859  | Roggwil Riedern | 310 | G2 | 0.889 | G2.2 | 0.889 | 0.111 | 0.889 | --    | --    | 0.155 | 0.845 |
| Räuchlisberger             | 14-003-860  | Roggwil Riedern | 311 | G2 | 0.533 | G2.2 | 0.793 | 0.467 | 0.533 | --    | --    | 0.207 | 0.793 |
| Rotlängler                 | 14-003-862  | Roggwil Riedern | 312 | G2 | 0.874 | G2.2 | 0.874 | 0.126 | 0.874 | --    | --    | 0.497 | 0.503 |
| Thorbirne                  | 14-003-864  | Roggwil Riedern | 313 | G2 | 0.896 | G2.1 | 0.896 | 0.104 | 0.896 | --    | --    | 0.574 | 0.426 |
| Schorne                    | 14-003-866  | Roggwil Riedern | 314 | G1 | 0.918 | G1.1 | 0.956 | 0.918 | 0.082 | 0.956 | 0.044 | --    | --    |
| Rotholzbirne               | 14-003-870  | Roggwil Riedern | 315 | G1 | 0.935 | G1.1 | 0.957 | 0.935 | 0.065 | 0.957 | 0.043 | --    | --    |
| Mostbirne                  | 14-003-871  | Roggwil Riedern | 316 | G2 | 0.732 | G2.1 | 0.738 | 0.268 | 0.732 | --    | --    | 0.738 | 0.262 |
| Welsch Glögger             | 14-003-873  | Roggwil Riedern | 317 | G2 | 0.939 | G2.1 | 0.939 | 0.061 | 0.939 | --    | --    | 0.641 | 0.359 |
| Zitronenbirne              | 14-003-874  | Roggwil Riedern | 318 | G2 | 0.944 | G2.1 | 0.950 | 0.056 | 0.944 | --    | --    | 0.950 | 0.050 |
| Lebruns Butterbirne        | 14-003-363  | Roggwil Riedern | 319 | G1 | 0.663 | G1.1 | 0.875 | 0.663 | 0.337 | 0.875 | 0.125 | --    | --    |
| Feigenbirne                | 14-003-879  | Roggwil Riedern | 320 | G2 | 0.957 | G2.1 | 0.957 | 0.043 | 0.957 | --    | --    | 0.728 | 0.272 |
| Gunteschuser               | 14-003-880  | Roggwil Riedern | 321 | G2 | 0.790 | G2.2 | 0.790 | 0.210 | 0.790 | --    | --    | 0.445 | 0.555 |
| Holzbirne                  | 14-003-943  | Roggwil Riedern | 322 | G2 | 0.922 | G2.2 | 0.922 | 0.078 | 0.922 | --    | --    | 0.093 | 0.907 |

|                                 |             |                 |     |    |       |      |       |       |       |       |       |       |       |
|---------------------------------|-------------|-----------------|-----|----|-------|------|-------|-------|-------|-------|-------|-------|-------|
| Magdalenen                      | 14-003-881  | Roggwil Riedern | 323 | G1 | 0.703 | G1.2 | 0.955 | 0.703 | 0.297 | 0.045 | 0.955 | --    | --    |
| Feigenbirne                     | 14-003-882  | Roggwil Riedern | 324 | G2 | 0.982 | G2.1 | 0.982 | 0.018 | 0.982 | --    | --    | 0.501 | 0.499 |
| Zuckerbirne                     | 14-003-1464 | Roggwil Riedern | 325 | G2 | 0.946 | G2.1 | 0.946 | 0.054 | 0.946 | --    | --    | 0.853 | 0.147 |
| unknown                         | 14-003-1465 | Roggwil Riedern | 326 | G1 | 0.915 | G1.2 | 0.979 | 0.915 | 0.085 | 0.021 | 0.979 | --    | --    |
| Trübler                         | 14-003-1466 | Roggwil Riedern | 327 | G2 | 0.903 | G2.1 | 0.903 | 0.097 | 0.903 | --    | --    | 0.751 | 0.249 |
| Zuckerbirne                     | 14-003-885  | Roggwil Riedern | 328 | G2 | 0.961 | G2.1 | 0.961 | 0.039 | 0.961 | --    | --    | 0.589 | 0.411 |
| Biessenhofer Birne              | 14-003-887  | Roggwil Riedern | 329 | G2 | 0.692 | G2.2 | 0.823 | 0.308 | 0.692 | --    | --    | 0.177 | 0.823 |
| Schmalzbirne von Brest/Heubirne | 14-003-557  | Roggwil Riedern | 330 | G2 | 0.958 | G2.1 | 0.958 | 0.042 | 0.958 | --    | --    | 0.867 | 0.133 |
| Landsknechtler                  | 14-003-555  | Roggwil Riedern | 331 | G2 | 0.908 | G2.1 | 0.933 | 0.092 | 0.908 | --    | --    | 0.933 | 0.067 |
| Chriesibirne                    | 14-003-889  | Roggwil Riedern | 332 | G2 | 0.962 | G2.1 | 0.962 | 0.038 | 0.962 | --    | --    | 0.823 | 0.177 |
| Feigenbirne                     | 14-003-892  | Roggwil Riedern | 333 | G2 | 0.787 | G2.1 | 0.787 | 0.213 | 0.787 | --    | --    | 0.609 | 0.391 |
| Trischeläbere                   | 14-003-626  | Roggwil Riedern | 334 | G2 | 0.910 | G2.1 | 0.910 | 0.090 | 0.910 | --    | --    | 0.713 | 0.287 |
| Letterbirne                     | 14-003-893  | Roggwil Riedern | 335 | G2 | 0.632 | G2.2 | 0.927 | 0.368 | 0.632 | --    | --    | 0.073 | 0.927 |
| Kammerbirne                     | 14-003-894  | Roggwil Riedern | 336 | G2 | 0.955 | G2.1 | 0.955 | 0.045 | 0.955 | --    | --    | 0.918 | 0.082 |
| Mehlbirne                       | 14-003-896  | Roggwil Riedern | 337 | G2 | 0.980 | G2.2 | 0.980 | 0.020 | 0.980 | --    | --    | 0.265 | 0.735 |
| Aeulisbirne                     | 14-003-897  | Roggwil Riedern | 338 | G2 | 0.958 | G2.1 | 0.958 | 0.042 | 0.958 | --    | --    | 0.816 | 0.184 |
| Rütibirne                       | 14-003-898  | Roggwil Riedern | 339 | G2 | 0.589 | G2.2 | 0.904 | 0.411 | 0.589 | --    | --    | 0.096 | 0.904 |
| Happerswiler                    | 14-003-899  | Roggwil Riedern | 340 | G1 | 0.770 | G1.2 | 0.936 | 0.770 | 0.230 | 0.064 | 0.936 | --    | --    |
| Butterbirne                     | 14-003-901  | Roggwil Riedern | 341 | G2 | 0.873 | G2.1 | 0.873 | 0.127 | 0.873 | --    | --    | 0.547 | 0.453 |
| Zitronenbirne                   | 14-003-903  | Roggwil Riedern | 342 | G1 | 0.700 | G1.2 | 0.968 | 0.700 | 0.300 | 0.032 | 0.968 | --    | --    |
| Muggenbirne                     | 14-003-905  | Roggwil Riedern | 343 | G2 | 0.883 | G2.2 | 0.883 | 0.117 | 0.883 | --    | --    | 0.342 | 0.658 |
| Blaulängala                     | 14-003-906  | Roggwil Riedern | 344 | G2 | 0.912 | G2.1 | 0.912 | 0.088 | 0.912 | --    | --    | 0.504 | 0.496 |
| Juxbirne                        | 14-003-909  | Roggwil Riedern | 345 | G1 | 0.706 | G1.2 | 0.945 | 0.706 | 0.294 | 0.055 | 0.945 | --    | --    |
| Winterlenkelen                  | 14-003-910  | Roggwil Riedern | 346 | G2 | 0.977 | G2.1 | 0.977 | 0.023 | 0.977 | --    | --    | 0.851 | 0.149 |
| unknown                         | 14-003-1468 | Roggwil Riedern | 347 | G1 | 0.542 | G1.2 | 0.915 | 0.542 | 0.458 | 0.085 | 0.915 | --    | --    |
| Königsbirne                     | 14-003-913  | Roggwil Riedern | 348 | G1 | 0.826 | G1.1 | 0.832 | 0.826 | 0.174 | 0.832 | 0.168 | --    | --    |
| Affelträngler                   | 14-003-916  | Roggwil Riedern | 349 | G2 | 0.651 | G2.2 | 0.888 | 0.349 | 0.651 | --    | --    | 0.112 | 0.888 |
| Herbstgütler                    | 14-003-298  | Roggwil Riedern | 350 | G2 | 0.532 | G2.2 | 0.564 | 0.468 | 0.532 | --    | --    | 0.436 | 0.564 |
| Spitzbirne                      | 14-003-717  | Roggwil Riedern | 351 | G2 | 0.938 | G2.2 | 0.938 | 0.062 | 0.938 | --    | --    | 0.252 | 0.748 |
| Betzelsbirne                    | 14-003-719  | Roggwil Riedern | 352 | G2 | 0.864 | G2.1 | 0.864 | 0.136 | 0.864 | --    | --    | 0.513 | 0.487 |
| Fleischbirne                    | 14-003-926  | Roggwil Riedern | 353 | G2 | 0.959 | G2.1 | 0.959 | 0.041 | 0.959 | --    | --    | 0.913 | 0.087 |
| Mostbirne                       | 14-003-928  | Roggwil Riedern | 354 | G2 | 0.930 | G2.1 | 0.930 | 0.070 | 0.930 | --    | --    | 0.925 | 0.075 |
| unknown                         | 14-003-929  | Roggwil Riedern | 355 | G2 | 0.961 | G2.1 | 0.961 | 0.039 | 0.961 | --    | --    | 0.783 | 0.217 |
| unknown                         | 14-003-1477 | Roggwil Riedern | 356 | G2 | 0.940 | G2.1 | 0.940 | 0.060 | 0.940 | --    | --    | 0.559 | 0.441 |
| Grünmöstler                     | 14-003-931  | Roggwil Riedern | 357 | G2 | 0.935 | G2.2 | 0.935 | 0.065 | 0.935 | --    | --    | 0.435 | 0.565 |
| Napoleons Butterbirne           | 14-003-429  | Roggwil Riedern | 358 | G1 | 0.974 | G1.1 | 0.981 | 0.974 | 0.026 | 0.981 | 0.019 | --    | --    |
| Zitronenbirne                   | 14-003-935  | Roggwil Riedern | 359 | G2 | 0.937 | G2.1 | 0.937 | 0.063 | 0.937 | --    | --    | 0.569 | 0.431 |
| Zitronenbirne                   | 14-003-937  | Roggwil Riedern | 360 | G1 | 0.980 | G1.1 | 0.983 | 0.980 | 0.020 | 0.983 | 0.017 | --    | --    |
| Happerswiler                    | 14-003-938  | Roggwil Riedern | 361 | G2 | 0.807 | G2.2 | 0.807 | 0.193 | 0.807 | --    | --    | 0.375 | 0.625 |
| unknown                         | 14-003-1480 | Roggwil Riedern | 362 | G2 | 0.964 | G2.1 | 0.964 | 0.036 | 0.964 | --    | --    | 0.912 | 0.088 |
| unknown                         | 14-003-1481 | Roggwil Riedern | 363 | G1 | 0.966 | G1.1 | 0.966 | 0.966 | 0.034 | 0.939 | 0.061 | --    | --    |
| Mostbirne                       | 14-003-939  | Roggwil Riedern | 364 | G1 | 0.532 | G1.2 | 0.973 | 0.532 | 0.468 | 0.027 | 0.973 | --    | --    |
| Butterbirne                     | 14-003-940  | Roggwil Riedern | 365 | G1 | 0.894 | G1.1 | 0.894 | 0.894 | 0.106 | 0.679 | 0.321 | --    | --    |
| Fischerbirne                    | 14-003-941  | Roggwil Riedern | 366 | G2 | 0.930 | G2.2 | 0.930 | 0.070 | 0.930 | --    | --    | 0.252 | 0.748 |
| Fleischbirne                    | 14-003-1012 | Roggwil Riedern | 367 | G1 | 0.523 | G1.2 | 0.943 | 0.523 | 0.477 | 0.057 | 0.943 | --    | --    |
| Bündner Langbirne               | 14-003-947  | Roggwil Riedern | 368 | G2 | 0.958 | G2.1 | 0.958 | 0.042 | 0.958 | --    | --    | 0.914 | 0.086 |
| Räberbirli                      | 14-003-955  | Roggwil Riedern | 369 | G2 | 0.843 | G2.1 | 0.843 | 0.157 | 0.843 | --    | --    | 0.624 | 0.376 |
| Martibirne                      | 14-003-959  | Roggwil Riedern | 370 | G2 | 0.978 | G2.2 | 0.978 | 0.022 | 0.978 | --    | --    | 0.186 | 0.814 |
| Fleischbirne                    | 14-003-962  | Roggwil Riedern | 371 | G2 | 0.931 | G2.1 | 0.931 | 0.069 | 0.931 | --    | --    | 0.676 | 0.324 |
| Winterbirne                     | 14-003-967  | Roggwil Riedern | 372 | G1 | 0.627 | G1.2 | 0.780 | 0.627 | 0.373 | 0.220 | 0.780 | --    | --    |
| Weinbirne                       | 14-003-971  | Roggwil Riedern | 373 | G2 | 0.972 | G2.2 | 0.972 | 0.028 | 0.972 | --    | --    | 0.351 | 0.649 |
| Kunstbirne                      | 14-003-972  | Roggwil Riedern | 374 | G2 | 0.962 | G2.1 | 0.962 | 0.038 | 0.962 | --    | --    | 0.943 | 0.057 |
| saure Kugelbirne                | 14-003-978  | Roggwil Riedern | 375 | G2 | 0.799 | G2.2 | 0.821 | 0.201 | 0.799 | --    | --    | 0.179 | 0.821 |
| Martinsbirne                    | 14-003-358  | Roggwil Riedern | 376 | G2 | 0.935 | G2.1 | 0.935 | 0.065 | 0.935 | --    | --    | 0.878 | 0.122 |
| Schwarzrädler                   | 14-003-563  | Roggwil Riedern | 377 | G2 | 0.969 | G2.1 | 0.969 | 0.031 | 0.969 | --    | --    | 0.652 | 0.348 |
| Rossaletti                      | 14-003-1003 | Roggwil Riedern | 378 | G1 | 0.900 | G1.2 | 0.973 | 0.900 | 0.100 | 0.027 | 0.973 | --    | --    |
| Blutbirne                       | 14-003-1004 | Roggwil Riedern | 379 | G1 | 0.575 | G1.2 | 0.929 | 0.575 | 0.425 | 0.071 | 0.929 | --    | --    |
| Lederbirne                      | 14-003-1006 | Roggwil Riedern | 380 | G2 | 0.751 | G2.1 | 0.751 | 0.249 | 0.751 | --    | --    | 0.717 | 0.283 |
| Ackerbirne                      | 14-003-1495 | Roggwil Riedern | 381 | G2 | 0.913 | G2.2 | 0.913 | 0.087 | 0.913 | --    | --    | 0.281 | 0.719 |
| Melone                          | 14-003-1096 | Roggwil Riedern | 382 | G2 | 0.968 | G2.1 | 0.968 | 0.032 | 0.968 | --    | --    | 0.948 | 0.052 |
| Züri-Birne                      | 14-003-1410 | Roggwil Riedern | 383 | G2 | 0.883 | G2.2 | 0.883 | 0.117 | 0.883 | --    | --    | 0.315 | 0.685 |
| Häsler                          | 14-003-730  | Roggwil Riedern | 384 | G2 | 0.934 | G2.2 | 0.934 | 0.066 | 0.934 | --    | --    | 0.151 | 0.849 |
| Heubirli                        | 14-003-1418 | Roggwil Riedern | 385 | G1 | 0.820 | G1.2 | 0.931 | 0.820 | 0.180 | 0.069 | 0.931 | --    | --    |
| Goyatzon                        | 14-003-1522 | Roggwil Riedern | 386 | G2 | 0.796 | G2.1 | 0.796 | 0.204 | 0.796 | --    | --    | 0.557 | 0.443 |
| Merode2                         | 14-003-2570 | Roggwil Riedern | 387 | G1 | 0.761 | G1.1 | 0.761 | 0.761 | 0.239 | 0.658 | 0.342 | --    | --    |
| Merode1                         | 14-003-1544 | Roggwil Riedern | 388 | G1 | 0.944 | G1.1 | 0.944 | 0.944 | 0.056 | 0.512 | 0.488 | --    | --    |
| Pétolin                         | 14-003-1567 | Roggwil Riedern | 389 | G1 | 0.511 | G1.2 | 0.956 | 0.511 | 0.489 | 0.044 | 0.956 | --    | --    |
| Petit Gris / Martinsec          | 14-003-1578 | Roggwil Riedern | 390 | G1 | 0.620 | G1.1 | 0.620 | 0.620 | 0.380 | 0.517 | 0.483 | --    | --    |
| Chriesibirne Thundorf           | 14-003-2569 | Roggwil Riedern | 391 | G2 | 0.769 | G2.1 | 0.769 | 0.231 | 0.769 | --    | --    | 0.580 | 0.420 |
| Schutzbirne                     | 14-003-561  | Höri            | 392 | G2 | 0.944 | G2.2 | 0.944 | 0.056 | 0.944 | --    | --    | 0.478 | 0.522 |
| Palmischbirne                   | 14-003-446  | Höri            | 393 | G1 | 0.524 | G1.1 | 0.606 | 0.524 | 0.476 | 0.606 | 0.394 | --    | --    |
| Schweizer Bratbirne             | 14-003-564  | Höri            | 394 | G2 | 0.981 | G2.1 | 0.981 | 0.019 | 0.981 | --    | --    | 0.576 | 0.424 |
| Guntershauser                   | 14-003-280  | Höri            | 395 | G2 | 0.931 | G2.2 | 0.931 | 0.069 | 0.931 | --    | --    | 0.357 | 0.643 |
| Ottenbacher Schellerbirne       | 14-003-444  | Höri            | 396 | G2 | 0.962 | G2.1 | 0.962 | 0.038 | 0.962 | --    | --    | 0.518 | 0.482 |
| Sommereierbirne                 | 14-003-581  | Höri            | 397 | G2 | 0.802 | G2.1 | 0.802 | 0.198 | 0.802 | --    | --    | 0.712 | 0.288 |
| Schwyzehose                     | 14-003-568  | Höri            | 398 | G2 | 0.658 | G2.2 | 0.762 | 0.342 | 0.658 | --    | --    | 0.238 | 0.762 |
| Ulmer Butterbirne               | 14-003-3640 | Höri            | 399 | G2 | 0.538 | G2.1 | 0.696 | 0.462 | 0.538 | --    | --    | 0.696 | 0.304 |
| Rheinholzbirne                  | 14-003-498  | Höri            | 400 | G2 | 0.758 | G2.2 | 0.772 | 0.242 | 0.758 | --    | --    | 0.228 | 0.772 |
| Herbstlängler                   | 14-003-299  | Höri            | 401 | G2 | 0.948 | G2.1 | 0.948 | 0.052 | 0.948 | --    | --    | 0.940 | 0.060 |
| Langstieler                     | 14-003-356  | Höri            | 402 | G2 | 0.905 | G2.1 | 0.905 | 0.095 | 0.905 | --    | --    | 0.703 | 0.297 |
| Guntershauser                   | 14-003-280  | Höri            | 403 | G2 | 0.720 | G2.2 | 0.720 | 0.280 | 0.720 | --    | --    | 0.492 | 0.508 |
| Schoggolabirne                  | 14-003-599  | Höri            | 404 | G1 | 0.743 | G1.2 | 0.811 | 0.743 | 0.257 | 0.189 | 0.811 | --    | --    |
| Lugnezer Honigbirne             | 14-003-375  | Höri            | 405 | G2 | 0.937 | G2.1 | 0.937 | 0.063 | 0.937 | --    | --    | 0.781 | 0.219 |
| Schafbirne                      | 14-003-553  | Höri            | 406 | G2 | 0.978 | G2.1 | 0.978 | 0.022 | 0.978 | --    | --    | 0.559 | 0.441 |
| Schafbirne                      | 14-003-553  | Höri            | 407 | G2 | 0.961 | G2.2 | 0.961 | 0.039 | 0.961 | --    | --    | 0.415 | 0.585 |
| Längler                         | 14-003-3652 | Höri            | 408 | G2 | 0.937 | G2.2 | 0.937 | 0.063 | 0.937 | --    | --    | 0.367 | 0.633 |
| Weldenser                       | 14-003-662  | Höri            | 409 | G1 | 0.745 | G1.1 | 0.882 | 0.745 | 0.255 | 0.882 | 0.118 | --    | --    |

|                           |             |          |     |    |       |      |       |       |       |       |       |       |       |
|---------------------------|-------------|----------|-----|----|-------|------|-------|-------|-------|-------|-------|-------|-------|
| Schweizer Bratbirne       | 14-003-564  | Höri     | 410 | G2 | 0.938 | G2.1 | 0.938 | 0.062 | 0.938 | --    | --    | 0.570 | 0.430 |
| Späte Weinbirne           | 14-003-3655 | Höri     | 411 | G2 | 0.888 | G2.2 | 0.888 | 0.112 | 0.888 | --    | --    | 0.212 | 0.788 |
| Richlisbirne              | 14-003-500  | Höri     | 412 | G2 | 0.959 | G2.2 | 0.959 | 0.041 | 0.959 | --    | --    | 0.261 | 0.739 |
| Bergler                   | 14-003-47   | Höri     | 413 | G2 | 0.888 | G2.2 | 0.888 | 0.112 | 0.888 | --    | --    | 0.432 | 0.568 |
| Ottenbacher Schellerbirne | 14-003-444  | Höri     | 414 | G2 | 0.960 | G2.2 | 0.960 | 0.040 | 0.960 | --    | --    | 0.350 | 0.650 |
| Ulmer Butterbirne         | 14-003-3641 | Höri     | 415 | G2 | 0.887 | G2.2 | 0.887 | 0.113 | 0.887 | --    | --    | 0.236 | 0.764 |
| Herbstgütler              | 14-003-3657 | Höri     | 416 | G2 | 0.543 | G2.2 | 0.563 | 0.457 | 0.543 | --    | --    | 0.437 | 0.563 |
| Goldschmeckler            | 14-003-253  | Höri     | 417 | G2 | 0.826 | G2.2 | 0.826 | 0.174 | 0.826 | --    | --    | 0.478 | 0.522 |
| Luzerner Weinbirne        | 14-003-378  | Höri     | 418 | G1 | 0.567 | G1.2 | 0.854 | 0.567 | 0.433 | 0.146 | 0.854 | --    | --    |
| Schwarzrädler             | 14-003-3660 | Höri     | 419 | G2 | 0.971 | G2.1 | 0.971 | 0.029 | 0.971 | --    | --    | 0.537 | 0.463 |
| Ottenbacher Schellerbirne | 14-003-444  | Höri     | 420 | G2 | 0.931 | G2.2 | 0.931 | 0.069 | 0.931 | --    | --    | 0.464 | 0.536 |
| Schwarzrädler             | 14-003-3660 | Höri     | 421 | G2 | 0.971 | G2.1 | 0.971 | 0.029 | 0.971 | --    | --    | 0.559 | 0.441 |
| Landsknechtler            | 14-003-3661 | Höri     | 422 | G2 | 0.737 | G2.1 | 0.737 | 0.263 | 0.737 | --    | --    | 0.639 | 0.361 |
| Schoggolabirne            | 14-003-599  | Höri     | 423 | G1 | 0.518 | G1.2 | 0.794 | 0.518 | 0.482 | 0.206 | 0.794 | --    | --    |
| Grünmöstler               | 14-003-3662 | Höri     | 424 | G2 | 0.967 | G2.1 | 0.967 | 0.033 | 0.967 | --    | --    | 0.562 | 0.438 |
| Luzeiner Längler          | 14-003-3663 | Höri     | 425 | G2 | 0.977 | G2.1 | 0.977 | 0.023 | 0.977 | --    | --    | 0.904 | 0.096 |
| Poire Martin-Sec          | 14-003-1150 | Höri     | 426 | G1 | 0.697 | G1.2 | 0.935 | 0.697 | 0.303 | 0.065 | 0.935 | --    | --    |
| Landsknechtler            | 14-003-3668 | Höri     | 427 | G1 | 0.659 | G1.2 | 0.977 | 0.659 | 0.341 | 0.023 | 0.977 | --    | --    |
| Lätterbirne               | 14-003-358  | Höri     | 428 | G2 | 0.940 | G2.2 | 0.940 | 0.060 | 0.940 | --    | --    | 0.491 | 0.509 |
| Frühe Weinbirne           | 14-003-226  | Höri     | 429 | G1 | 0.773 | G1.1 | 0.773 | 0.773 | 0.227 | 0.596 | 0.404 | --    | --    |
| Längler                   | 14-003-3653 | Höri     | 430 | G2 | 0.965 | G2.1 | 0.965 | 0.035 | 0.965 | --    | --    | 0.954 | 0.046 |
| Rotlängler                | 14-003-3666 | Höri     | 431 | G2 | 0.969 | G2.1 | 0.969 | 0.031 | 0.969 | --    | --    | 0.928 | 0.072 |
| Hasenbirne                | 14-003-3670 | Höri     | 432 | G2 | 0.962 | G2.2 | 0.962 | 0.038 | 0.962 | --    | --    | 0.250 | 0.750 |
| Herbstgütler              | 14-003-3658 | Höri     | 433 | G2 | 0.552 | G2.2 | 0.568 | 0.448 | 0.552 | --    | --    | 0.432 | 0.568 |
| Blutbirne                 | 14-003-68   | Höri     | 434 | G2 | 0.845 | G2.1 | 0.845 | 0.155 | 0.845 | --    | --    | 0.660 | 0.340 |
| Rotlängler                | 14-003-3667 | Höri     | 435 | G2 | 0.973 | G2.1 | 0.973 | 0.027 | 0.973 | --    | --    | 0.949 | 0.051 |
| unknown                   | 14-003-1267 | Koppigen | 436 | G2 | 0.560 | G2.1 | 0.631 | 0.440 | 0.560 | --    | --    | 0.631 | 0.369 |
| unknown                   | 14-003-1431 | Koppigen | 437 | G1 | 0.783 | G1.1 | 0.931 | 0.783 | 0.217 | 0.931 | 0.069 | --    | --    |
| Ankenbirne                | 14-003-1271 | Koppigen | 438 | G1 | 0.734 | G1.2 | 0.908 | 0.734 | 0.266 | 0.092 | 0.908 | --    | --    |
| unknown                   | 14-003-1230 | Koppigen | 439 | G2 | 0.935 | G2.1 | 0.948 | 0.065 | 0.935 | --    | --    | 0.948 | 0.052 |
| Herrenbirne               | 14-003-1312 | Koppigen | 440 | G2 | 0.785 | G2.2 | 0.785 | 0.215 | 0.785 | --    | --    | 0.243 | 0.757 |
| Siegelbirne               | 14-003-1313 | Koppigen | 441 | G2 | 0.652 | G2.1 | 0.800 | 0.348 | 0.652 | --    | --    | 0.800 | 0.200 |
| Schneebirne               | 14-003-1310 | Koppigen | 442 | G2 | 0.953 | G2.1 | 0.953 | 0.047 | 0.953 | --    | --    | 0.878 | 0.122 |
| unknown                   | 14-003-1340 | Koppigen | 443 | G2 | 0.751 | G2.1 | 0.751 | 0.249 | 0.751 | --    | --    | 0.751 | 0.249 |
| Speckbirne                | 14-003-1360 | Koppigen | 444 | G2 | 0.575 | G2.1 | 0.577 | 0.425 | 0.575 | --    | --    | 0.577 | 0.423 |
| Roussonetli               | 14-003-1354 | Koppigen | 445 | G1 | 0.914 | G1.1 | 0.972 | 0.914 | 0.086 | 0.972 | 0.028 | --    | --    |
| unknown                   | 14-003-1348 | Koppigen | 446 | G2 | 0.957 | G2.1 | 0.957 | 0.043 | 0.957 | --    | --    | 0.568 | 0.432 |
| unknown                   | 14-003-1332 | Koppigen | 447 | G2 | 0.973 | G2.1 | 0.973 | 0.027 | 0.973 | --    | --    | 0.529 | 0.471 |
| Schafbirne                | 14-003-1228 | Koppigen | 448 | G2 | 0.793 | G2.2 | 0.809 | 0.207 | 0.793 | --    | --    | 0.191 | 0.809 |
| Bühlbirne                 | 14-003-1257 | Koppigen | 449 | G2 | 0.894 | G2.2 | 0.894 | 0.106 | 0.894 | --    | --    | 0.224 | 0.776 |
| unknown                   | 14-003-1234 | Koppigen | 450 | G1 | 0.549 | G1.2 | 0.701 | 0.549 | 0.451 | 0.299 | 0.701 | --    | --    |
| Mutschgentellerbirne      | 14-003-1106 | Koppigen | 451 | G2 | 0.597 | G2.1 | 0.597 | 0.403 | 0.597 | --    | --    | 0.501 | 0.499 |
| Herzbirnen                | 14-003-1233 | Koppigen | 452 | G2 | 0.970 | G2.1 | 0.970 | 0.030 | 0.970 | --    | --    | 0.836 | 0.164 |
| Kugelbirne                | 14-003-1242 | Koppigen | 453 | G2 | 0.962 | G2.1 | 0.962 | 0.038 | 0.962 | --    | --    | 0.721 | 0.279 |
| Stettlenbirne             | 14-003-1249 | Koppigen | 454 | G2 | 0.884 | G2.1 | 0.884 | 0.116 | 0.884 | --    | --    | 0.830 | 0.170 |
| Hostettler                | 14-003-1254 | Koppigen | 455 | G1 | 0.694 | G1.1 | 0.840 | 0.694 | 0.306 | 0.840 | 0.160 | --    | --    |
| Sonnenbirne               | 14-003-1236 | Koppigen | 456 | G2 | 0.973 | G2.1 | 0.973 | 0.027 | 0.973 | --    | --    | 0.687 | 0.313 |
| Bockbirneli               | 14-003-1109 | Koppigen | 457 | G2 | 0.966 | G2.1 | 0.966 | 0.034 | 0.966 | --    | --    | 0.645 | 0.355 |
| Goldtaler                 | 14-003-1387 | Koppigen | 458 | G2 | 0.918 | G2.1 | 0.918 | 0.082 | 0.918 | --    | --    | 0.539 | 0.461 |
| Augustbeerli              | 14-003-1097 | Koppigen | 459 | G2 | 0.772 | G2.2 | 0.772 | 0.228 | 0.772 | --    | --    | 0.255 | 0.745 |
| unknown                   | 14-003-1250 | Koppigen | 460 | G1 | 0.909 | G1.1 | 0.948 | 0.909 | 0.091 | 0.948 | 0.052 | --    | --    |
| Butter                    | 14-003-1220 | Koppigen | 461 | G1 | 0.684 | G1.1 | 0.684 | 0.684 | 0.316 | 0.547 | 0.453 | --    | --    |
| Gelbbirne                 | 14-003-1241 | Koppigen | 462 | G2 | 0.963 | G2.2 | 0.963 | 0.037 | 0.963 | --    | --    | 0.143 | 0.857 |
| Augustbirne               | 14-003-1246 | Koppigen | 463 | G2 | 0.981 | G2.2 | 0.981 | 0.019 | 0.981 | --    | --    | 0.463 | 0.537 |
| Winterbirne               | 14-003-1114 | Koppigen | 464 | G2 | 0.723 | G2.1 | 0.723 | 0.277 | 0.723 | --    | --    | 0.609 | 0.391 |
| unknown                   | 14-003-1245 | Koppigen | 465 | G2 | 0.974 | G2.2 | 0.974 | 0.026 | 0.974 | --    | --    | 0.214 | 0.786 |
| Olives                    | 14-003-1282 | Koppigen | 466 | G2 | 0.923 | G2.2 | 0.923 | 0.077 | 0.923 | --    | --    | 0.342 | 0.658 |
| Amman                     | 14-003-1221 | Koppigen | 467 | G1 | 0.883 | G1.2 | 0.883 | 0.883 | 0.117 | 0.247 | 0.753 | --    | --    |
| unknown                   | 14-003-1357 | Koppigen | 468 | G2 | 0.877 | G2.1 | 0.877 | 0.123 | 0.877 | --    | --    | 0.591 | 0.409 |
| unknown                   | 14-003-1264 | Koppigen | 469 | G2 | 0.954 | G2.1 | 0.954 | 0.046 | 0.954 | --    | --    | 0.826 | 0.174 |
| unknown                   | 14-003-1283 | Koppigen | 470 | G2 | 0.881 | G2.1 | 0.881 | 0.119 | 0.881 | --    | --    | 0.540 | 0.460 |
| Gartenbirne               | 14-003-725  | Koppigen | 471 | G2 | 0.953 | G2.1 | 0.953 | 0.047 | 0.953 | --    | --    | 0.609 | 0.391 |
| unknown                   | 14-003-1356 | Koppigen | 472 | G2 | 0.929 | G2.1 | 0.929 | 0.071 | 0.929 | --    | --    | 0.636 | 0.364 |
| unknown                   | 14-003-1362 | Koppigen | 473 | G1 | 0.764 | G1.1 | 0.764 | 0.764 | 0.236 | 0.707 | 0.293 | --    | --    |
| Butterbirne               | 14-003-1298 | Koppigen | 474 | G1 | 0.956 | G1.1 | 0.956 | 0.956 | 0.044 | 0.889 | 0.111 | --    | --    |
| Butterbirne               | 14-003-1091 | Koppigen | 475 | G2 | 0.820 | G2.1 | 0.820 | 0.180 | 0.820 | --    | --    | 0.586 | 0.414 |
| Channebire / Würgebire    | 14-003-1108 | Koppigen | 476 | G2 | 0.917 | G2.1 | 0.917 | 0.083 | 0.917 | --    | --    | 0.550 | 0.450 |
| Bühlbirne                 | 14-003-1274 | Koppigen | 477 | G2 | 0.834 | G2.2 | 0.925 | 0.166 | 0.834 | --    | --    | 0.075 | 0.925 |
| Poire de fer              | 14-003-1294 | Koppigen | 478 | G2 | 0.796 | G2.1 | 0.796 | 0.204 | 0.796 | --    | --    | 0.681 | 0.319 |
| Köllikerbirne             | 14-003-1297 | Koppigen | 479 | G2 | 0.956 | G2.1 | 0.956 | 0.044 | 0.956 | --    | --    | 0.597 | 0.403 |
| Kodia vert                | 14-003-1279 | Koppigen | 480 | G2 | 0.878 | G2.1 | 0.878 | 0.122 | 0.878 | --    | --    | 0.812 | 0.188 |
| Coyet                     | 14-003-1296 | Koppigen | 481 | G2 | 0.886 | G2.1 | 0.886 | 0.114 | 0.886 | --    | --    | 0.557 | 0.443 |
| Winterbirne               | 14-003-1324 | Koppigen | 482 | G1 | 0.806 | G1.1 | 0.851 | 0.806 | 0.194 | 0.851 | 0.149 | --    | --    |
| Crugelbirnen              | 14-003-1318 | Koppigen | 483 | G1 | 0.773 | G1.2 | 0.773 | 0.773 | 0.227 | 0.330 | 0.670 | --    | --    |
| unknown                   | 14-003-1325 | Koppigen | 484 | G1 | 0.863 | G1.1 | 0.863 | 0.863 | 0.137 | 0.789 | 0.211 | --    | --    |
| Sürler                    | 14-003-732  | Koppigen | 485 | G2 | 0.907 | G2.2 | 0.907 | 0.093 | 0.907 | --    | --    | 0.490 | 0.510 |
| unknown                   | 14-003-1358 | Koppigen | 486 | G1 | 0.875 | G1.1 | 0.875 | 0.875 | 0.125 | 0.872 | 0.128 | --    | --    |
| Zuckerbirne               | 14-003-1243 | Koppigen | 487 | G2 | 0.982 | G2.2 | 0.982 | 0.018 | 0.982 | --    | --    | 0.154 | 0.846 |
| Grossmüeti                | 14-003-1216 | Koppigen | 488 | G2 | 0.659 | G2.1 | 0.687 | 0.341 | 0.659 | --    | --    | 0.687 | 0.313 |
| unknown                   | 14-003-1349 | Koppigen | 489 | G1 | 0.970 | G1.1 | 0.970 | 0.970 | 0.030 | 0.967 | 0.033 | --    | --    |
| unknown                   | 14-003-1338 | Koppigen | 490 | G1 | 0.924 | G1.1 | 0.968 | 0.924 | 0.076 | 0.968 | 0.032 | --    | --    |
| Farnatte                  | 14-003-1281 | Koppigen | 491 | G2 | 0.878 | G2.2 | 0.878 | 0.122 | 0.878 | --    | --    | 0.242 | 0.758 |
| Siegelbirne               | 14-003-1329 | Koppigen | 492 | G2 | 0.970 | G2.2 | 0.970 | 0.030 | 0.970 | --    | --    | 0.478 | 0.522 |
| Bühler                    | 14-003-1277 | Koppigen | 493 | G1 | 0.936 | G1.1 | 0.936 | 0.936 | 0.064 | 0.633 | 0.367 | --    | --    |
| unknown                   | 14-003-1350 | Koppigen | 494 | G2 | 0.592 | G2.2 | 0.902 | 0.408 | 0.592 | --    | --    | 0.098 | 0.902 |
| Rodje Bougre              | 14-003-1295 | Koppigen | 495 | G1 | 0.680 | G1.2 | 0.977 | 0.680 | 0.320 | 0.023 | 0.977 | --    | --    |
| Dornbirne / Schürbire     | 14-003-1103 | Koppigen | 496 | G2 | 0.647 | G2.2 | 0.760 | 0.353 | 0.647 | --    | --    | 0.240 | 0.760 |

|                            |             |               |     |    |       |      |       |       |       |       |       |       |       |
|----------------------------|-------------|---------------|-----|----|-------|------|-------|-------|-------|-------|-------|-------|-------|
| Gätterlibirne              | 14-003-1105 | Koppigen      | 497 | G1 | 0.675 | G1.2 | 0.675 | 0.675 | 0.325 | 0.427 | 0.573 | --    | --    |
| Schweizer Goldbirne        | 14-003-1218 | Koppigen      | 498 | G1 | 0.976 | G1.1 | 0.976 | 0.976 | 0.024 | 0.936 | 0.064 | --    | --    |
| Herrenbirne / Wagner       | 14-003-1113 | Koppigen      | 499 | G1 | 0.968 | G1.1 | 0.979 | 0.968 | 0.032 | 0.979 | 0.021 | --    | --    |
| unknown                    | 14-003-1361 | Koppigen      | 500 | G2 | 0.813 | G2.1 | 0.813 | 0.187 | 0.813 | --    | --    | 0.715 | 0.285 |
| unknown                    | 14-003-1224 | Koppigen      | 501 | G1 | 0.965 | G1.1 | 0.965 | 0.965 | 0.035 | 0.721 | 0.279 | --    | --    |
| Königs Butterbirne         | 14-003-1304 | Koppigen      | 502 | G1 | 0.944 | G1.1 | 0.944 | 0.944 | 0.056 | 0.921 | 0.079 | --    | --    |
| Weinbirne                  | 14-003-1270 | Koppigen      | 503 | G2 | 0.941 | G2.2 | 0.941 | 0.059 | 0.941 | --    | --    | 0.066 | 0.934 |
| Bockbirnen                 | 14-003-1323 | Koppigen      | 504 | G2 | 0.945 | G2.1 | 0.945 | 0.055 | 0.945 | --    | --    | 0.683 | 0.317 |
| unknown                    | 14-003-1308 | Koppigen      | 505 | G1 | 0.854 | G1.2 | 0.854 | 0.854 | 0.146 | 0.463 | 0.537 | --    | --    |
| Heubirne                   | 14-003-1244 | Koppigen      | 506 | G2 | 0.598 | G2.2 | 0.829 | 0.402 | 0.598 | --    | --    | 0.171 | 0.829 |
| Philipps Butterbirne       | 14-003-1352 | Koppigen      | 507 | G1 | 0.832 | G1.1 | 0.832 | 0.832 | 0.168 | 0.809 | 0.191 | --    | --    |
| unknown                    | 14-003-1292 | Koppigen      | 508 | G2 | 0.897 | G2.2 | 0.897 | 0.103 | 0.897 | --    | --    | 0.447 | 0.553 |
| Holländerbirne             | 14-003-1287 | Koppigen      | 509 | G2 | 0.821 | G2.1 | 0.821 | 0.179 | 0.821 | --    | --    | 0.708 | 0.292 |
| Butterbirne / Ankebire     | 14-003-1319 | Koppigen      | 510 | G1 | 0.661 | G1.1 | 0.661 | 0.661 | 0.339 | 0.604 | 0.396 | --    | --    |
| Fivisbirne                 | 14-003-1263 | Koppigen      | 511 | G1 | 0.680 | G1.2 | 0.931 | 0.680 | 0.320 | 0.069 | 0.931 | --    | --    |
| Schürlibirne               | 14-003-1268 | Koppigen      | 512 | G2 | 0.952 | G2.2 | 0.952 | 0.048 | 0.952 | --    | --    | 0.335 | 0.665 |
| Speckbirne                 | 14-003-1286 | Koppigen      | 513 | G2 | 0.952 | G2.1 | 0.952 | 0.048 | 0.952 | --    | --    | 0.937 | 0.063 |
| Späte                      | 14-003-1111 | Koppigen      | 514 | G1 | 0.854 | G1.1 | 0.854 | 0.854 | 0.146 | 0.695 | 0.305 | --    | --    |
| Birli                      | 14-003-1089 | Koppigen      | 515 | G1 | 0.972 | G1.1 | 0.972 | 0.972 | 0.028 | 0.944 | 0.056 | --    | --    |
| Hausbirne / Balisadenbirne | 14-003-1276 | Koppigen      | 516 | G2 | 0.727 | G2.1 | 0.750 | 0.273 | 0.727 | --    | --    | 0.750 | 0.250 |
| Grünbirne                  | 14-003-1322 | Koppigen      | 517 | G1 | 0.870 | G1.2 | 0.874 | 0.870 | 0.130 | 0.126 | 0.874 | --    | --    |
| Goldforelle                | 14-003-1300 | Koppigen      | 518 | G1 | 0.968 | G1.1 | 0.968 | 0.968 | 0.032 | 0.961 | 0.039 | --    | --    |
| Ankenbirne                 | 14-003-1333 | Koppigen      | 519 | G1 | 0.963 | G1.2 | 0.963 | 0.963 | 0.037 | 0.102 | 0.898 | --    | --    |
| Rotfleischiges Birli       | 14-003-1335 | Koppigen      | 520 | G1 | 0.560 | G1.2 | 0.966 | 0.560 | 0.440 | 0.034 | 0.966 | --    | --    |
| Augustbirne                | 14-003-1316 | Koppigen      | 521 | G2 | 0.970 | G2.2 | 0.970 | 0.030 | 0.970 | --    | --    | 0.229 | 0.771 |
| Zitronenbirne              | 14-003-1305 | Koppigen      | 522 | G1 | 0.601 | G1.2 | 0.935 | 0.601 | 0.399 | 0.065 | 0.935 | --    | --    |
| Wasserdorn                 | 14-003-1260 | Koppigen      | 523 | G2 | 0.938 | G2.1 | 0.938 | 0.062 | 0.938 | --    | --    | 0.564 | 0.436 |
| unknown                    | 14-003-1240 | Koppigen      | 524 | G1 | 0.909 | G1.1 | 0.940 | 0.909 | 0.091 | 0.940 | 0.060 | --    | --    |
| Regelbirne                 | 14-003-1100 | Koppigen      | 525 | G1 | 0.534 | G1.2 | 0.971 | 0.534 | 0.466 | 0.029 | 0.971 | --    | --    |
| Späte Ankenbirne           | 14-003-1101 | Koppigen      | 526 | G1 | 0.912 | G1.1 | 0.975 | 0.912 | 0.088 | 0.975 | 0.025 | --    | --    |
| Weihnachtsbirne            | 14-003-1110 | Koppigen      | 527 | G1 | 0.868 | G1.1 | 0.951 | 0.868 | 0.132 | 0.951 | 0.049 | --    | --    |
| Butterbirne                | 14-003-1222 | Koppigen      | 528 | G2 | 0.582 | G2.1 | 0.582 | 0.418 | 0.582 | --    | --    | 0.577 | 0.423 |
| Fleischbirne               | 14-003-724  | Koppigen      | 529 | G1 | 0.975 | G1.1 | 0.983 | 0.975 | 0.025 | 0.983 | 0.017 | --    | --    |
| unknown                    | 14-003-1433 | Koppigen      | 530 | G2 | 0.911 | G2.1 | 0.911 | 0.089 | 0.911 | --    | --    | 0.539 | 0.461 |
| Dörrbirne                  | 14-003-1047 | Koppigen      | 531 | G2 | 0.963 | G2.2 | 0.963 | 0.037 | 0.963 | --    | --    | 0.188 | 0.812 |
| unknown                    | 14-003-1285 | Koppigen      | 532 | G1 | 0.782 | G1.1 | 0.782 | 0.782 | 0.218 | 0.767 | 0.233 | --    | --    |
| Berner Wasserbirne         | 14-003-1251 | Koppigen      | 533 | G2 | 0.968 | G2.2 | 0.968 | 0.032 | 0.968 | --    | --    | 0.083 | 0.917 |
| unknown                    | 14-003-1307 | Koppigen      | 534 | G2 | 0.801 | G2.2 | 0.801 | 0.199 | 0.801 | --    | --    | 0.466 | 0.534 |
| Bodmer                     | 14-003-1275 | Koppigen      | 535 | G2 | 0.938 | G2.1 | 0.938 | 0.062 | 0.938 | --    | --    | 0.726 | 0.274 |
| Rägelisbirne               | 14-003-1303 | Koppigen      | 536 | G1 | 0.921 | G1.1 | 0.923 | 0.921 | 0.079 | 0.923 | 0.077 | --    | --    |
| Pfundbirne                 | 14-003-1258 | Koppigen      | 537 | G1 | 0.955 | G1.1 | 0.970 | 0.955 | 0.045 | 0.970 | 0.030 | --    | --    |
| Zwiebelbirne               | 14-003-1261 | Koppigen      | 538 | G1 | 0.876 | G1.2 | 0.962 | 0.876 | 0.124 | 0.038 | 0.962 | --    | --    |
| Safretbirne                | 14-003-1284 | Koppigen      | 539 | G2 | 0.958 | G2.1 | 0.958 | 0.042 | 0.958 | --    | --    | 0.661 | 0.339 |
| Hängler                    | 14-003-1060 | Koppigen      | 540 | G2 | 0.943 | G2.1 | 0.943 | 0.057 | 0.943 | --    | --    | 0.722 | 0.278 |
| Grossmutterbirne           | 14-003-1259 | Koppigen      | 541 | G2 | 0.872 | G2.1 | 0.872 | 0.128 | 0.872 | --    | --    | 0.641 | 0.359 |
| Ankenbirne                 | 14-003-1306 | Koppigen      | 542 | G1 | 0.934 | G1.2 | 0.934 | 0.934 | 0.066 | 0.476 | 0.524 | --    | --    |
| Stielbirne                 | 14-003-1326 | Koppigen      | 543 | G2 | 0.968 | G2.2 | 0.968 | 0.032 | 0.968 | --    | --    | 0.381 | 0.619 |
| Jakob                      | 14-003-1291 | Koppigen      | 544 | G1 | 0.971 | G1.1 | 0.971 | 0.971 | 0.029 | 0.921 | 0.079 | --    | --    |
| Herzbirne                  | 14-003-1311 | Koppigen      | 545 | G1 | 0.755 | G1.2 | 0.943 | 0.755 | 0.245 | 0.057 | 0.943 | --    | --    |
| Siegelbirne                | 14-003-1255 | Koppigen      | 546 | G2 | 0.977 | G2.1 | 0.977 | 0.023 | 0.977 | --    | --    | 0.513 | 0.487 |
| Ankenbirne                 | 14-003-1237 | Koppigen      | 547 | G1 | 0.983 | G1.1 | 0.983 | 0.983 | 0.017 | 0.972 | 0.028 | --    | --    |
| Hirschbirli                | 14-003-1238 | Koppigen      | 548 | G2 | 0.750 | G2.2 | 0.750 | 0.250 | 0.750 | --    | --    | 0.481 | 0.519 |
| unknown                    | 14-003-1301 | Koppigen      | 549 | G1 | 0.983 | G1.1 | 0.987 | 0.983 | 0.017 | 0.987 | 0.013 | --    | --    |
| Martinsbirne               | 14-003-993  | Roggwil Hofen | 550 | G2 | 0.963 | G2.1 | 0.963 | 0.037 | 0.963 | --    | --    | 0.868 | 0.132 |
| Richlisbirne               | 14-003-500  | Roggwil Hofen | 551 | G2 | 0.968 | G2.2 | 0.968 | 0.032 | 0.968 | --    | --    | 0.115 | 0.885 |
| Blutbirne                  | 14-003-68   | Roggwil Hofen | 552 | G1 | 0.538 | G1.2 | 0.931 | 0.538 | 0.462 | 0.069 | 0.931 | --    | --    |
| Müslar                     | 14-003-425  | Roggwil Hofen | 553 | G2 | 0.888 | G2.2 | 0.888 | 0.112 | 0.888 | --    | --    | 0.304 | 0.696 |
| Gerzler Birne              | 14-003-242  | Roggwil Hofen | 554 | G2 | 0.958 | G2.2 | 0.958 | 0.042 | 0.958 | --    | --    | 0.112 | 0.888 |
| Schwyzhose                 | 14-003-568  | Roggwil Hofen | 555 | G1 | 0.946 | G1.1 | 0.946 | 0.946 | 0.054 | 0.660 | 0.340 | --    | --    |
| Strickbirne                | 14-003-3673 | Roggwil Hofen | 556 | G2 | 0.896 | G2.2 | 0.896 | 0.104 | 0.896 | --    | --    | 0.205 | 0.795 |
| Trübler                    | 14-003-3674 | Roggwil Hofen | 557 | G2 | 0.955 | G2.2 | 0.955 | 0.045 | 0.955 | --    | --    | 0.075 | 0.925 |
| Kollersbirne               | 14-003-340  | Roggwil Hofen | 558 | G2 | 0.968 | G2.1 | 0.968 | 0.032 | 0.968 | --    | --    | 0.895 | 0.105 |
| Schoggolabirne             | 14-003-559  | Roggwil Hofen | 559 | G1 | 0.620 | G1.2 | 0.921 | 0.620 | 0.380 | 0.079 | 0.921 | --    | --    |
| Herbstgütler               | 14-003-3670 | Roggwil Hofen | 560 | G1 | 0.518 | G1.1 | 0.689 | 0.518 | 0.482 | 0.689 | 0.311 | --    | --    |
| Sommereierbirne            | 14-003-581  | Roggwil Hofen | 561 | G2 | 0.836 | G2.1 | 0.836 | 0.164 | 0.836 | --    | --    | 0.587 | 0.413 |
| Lugnezer Honigbirne        | 14-003-375  | Roggwil Hofen | 562 | G2 | 0.957 | G2.1 | 0.957 | 0.043 | 0.957 | --    | --    | 0.583 | 0.417 |
| Rotlängler Dörrbirne       | 14-003-526  | Roggwil Hofen | 563 | G2 | 0.923 | G2.2 | 0.923 | 0.077 | 0.923 | --    | --    | 0.467 | 0.533 |
| Hanslibirne                | 14-003-288  | Aubonne       | 564 | G1 | 0.963 | G1.2 | 0.963 | 0.963 | 0.037 | 0.468 | 0.532 | --    | --    |
| Petit Gollia               | 14-003-458  | Aubonne       | 565 | G2 | 0.976 | G2.1 | 0.976 | 0.024 | 0.976 | --    | --    | 0.917 | 0.083 |
| De Versvey                 | 14-003-2527 | Aubonne       | 566 | G1 | 0.563 | G1.2 | 0.963 | 0.563 | 0.437 | 0.037 | 0.963 | --    | --    |
| Oberuzwiler                | -           | privat        | 567 | G1 | 0.936 | G1.1 | 0.963 | 0.936 | 0.064 | 0.963 | 0.037 | --    | --    |
| Collonges                  | 14-003-2505 | Aubonne       | 568 | G1 | 0.567 | G1.2 | 0.748 | 0.567 | 0.433 | 0.252 | 0.748 | --    | --    |
| Forel                      | 14-003-2510 | Aubonne       | 569 | G2 | 0.862 | G2.1 | 0.862 | 0.138 | 0.862 | --    | --    | 0.578 | 0.422 |
| Wespenbirne                | 14-003-667  | Aubonne       | 570 | G1 | 0.621 | G1.2 | 0.974 | 0.621 | 0.379 | 0.026 | 0.974 | --    | --    |
| Corsinges                  | 14-003-2506 | Aubonne       | 571 | G1 | 0.960 | G1.2 | 0.960 | 0.960 | 0.040 | 0.131 | 0.869 | --    | --    |
| Fossati                    | 14-003-2511 | Aubonne       | 572 | G1 | 0.638 | G1.2 | 0.897 | 0.638 | 0.362 | 0.103 | 0.897 | --    | --    |
| Allinges                   | 14-003-9    | Aubonne       | 573 | G1 | 0.883 | G1.1 | 0.883 | 0.883 | 0.117 | 0.735 | 0.265 | --    | --    |
| Bataille des Evouettes     | 14-003-34   | Aclens        | 574 | G1 | 0.724 | G1.2 | 0.979 | 0.724 | 0.276 | 0.021 | 0.979 | --    | --    |
| Blesson à longue queue     | 14-003-63   | Aclens        | 575 | G2 | 0.517 | G2.2 | 0.732 | 0.483 | 0.517 | --    | --    | 0.268 | 0.732 |
| Poire Corsinge             | 14-003-2534 | Aclens        | 576 | G1 | 0.944 | G1.2 | 0.944 | 0.944 | 0.056 | 0.081 | 0.919 | --    | --    |
| La Fribourgeoise           | 14-003-351  | Aclens        | 577 | G2 | 0.940 | G2.1 | 0.940 | 0.060 | 0.940 | --    | --    | 0.857 | 0.143 |
| Poire Pétoilin             | 14-003-459  | Aclens        | 578 | G2 | 0.519 | G2.2 | 0.782 | 0.481 | 0.519 | --    | --    | 0.218 | 0.782 |
| Poire Pueta Pé             | 14-003-2531 | Aclens        | 579 | G1 | 0.853 | G1.2 | 0.853 | 0.853 | 0.147 | 0.344 | 0.656 | --    | --    |
| Roussette                  | 14-003-2526 | Aclens        | 580 | G1 | 0.758 | G1.2 | 0.966 | 0.758 | 0.242 | 0.034 | 0.966 | --    | --    |
| Poire Sanguinole           | 14-003-547  | Aclens        | 581 | G1 | 0.730 | G1.2 | 0.970 | 0.730 | 0.270 | 0.030 | 0.970 | --    | --    |
| Poire Bacon                | 14-003-23   | Aclens        | 582 | G1 | 0.957 | G1.1 | 0.957 | 0.957 | 0.043 | 0.692 | 0.308 | --    | --    |
| Poire Caloué               | 14-003-96   | Aclens        | 583 | G1 | 0.717 | G1.2 | 0.754 | 0.717 | 0.283 | 0.246 | 0.754 | --    | --    |

|                              |             |              |     |    |              |      |              |              |              |              |              |              |              |
|------------------------------|-------------|--------------|-----|----|--------------|------|--------------|--------------|--------------|--------------|--------------|--------------|--------------|
| Poire Calouet                | 14-003-97   | Aclens       | 584 | G1 | 0.633        | G1.2 | 0.679        | 0.633        | 0.367        | 0.321        | 0.679        | --           | --           |
| Poire Caoué                  | 14-003-102  | Aclens       | 585 | G2 | 0.798        | G2.2 | 0.798        | 0.202        | 0.798        | --           | --           | 0.445        | 0.555        |
| Poire de Fer                 | 14-003-1146 | Aclens       | 586 | G2 | <b>0.865</b> | G2.2 | <b>0.865</b> | 0.135        | <b>0.865</b> | --           | --           | 0.179        | <b>0.821</b> |
| Poire du Four                | 14-003-1148 | Aclens       | 587 | G2 | <b>0.919</b> | G2.1 | <b>0.919</b> | 0.081        | <b>0.919</b> | --           | --           | <b>0.804</b> | 0.196        |
| Poire Golliatson             | 14-003-2544 | Aclens       | 588 | G2 | <b>0.812</b> | G2.2 | <b>0.812</b> | 0.188        | <b>0.812</b> | --           | --           | 0.434        | 0.566        |
| Poire Mocaté                 | 14-003-1151 | Aclens       | 589 | G2 | 0.601        | G2.1 | 0.683        | 0.399        | 0.601        | --           | --           | 0.683        | 0.317        |
| Poire Olivette               | 14-003-1152 | Aclens       | 590 | G2 | 0.701        | G2.2 | 0.701        | 0.299        | 0.701        | --           | --           | 0.499        | 0.501        |
| Poire Piasse                 | 14-003-1153 | Aclens       | 591 | G1 | 0.797        | G1.2 | <b>0.933</b> | 0.797        | 0.203        | 0.067        | <b>0.933</b> | --           | --           |
| Poire rouge                  | 14-003-1560 | Aclens       | 592 | G2 | <b>0.881</b> | G2.1 | <b>0.881</b> | 0.119        | <b>0.881</b> | --           | --           | 0.590        | 0.410        |
| Rousselette                  | 14-003-1545 | Aclens       | 593 | G1 | <b>0.965</b> | G1.2 | <b>0.974</b> | <b>0.965</b> | 0.035        | 0.026        | <b>0.974</b> | --           | --           |
| Saint-Jean                   | 14-003-1546 | Aclens       | 594 | G1 | <b>0.967</b> | G1.2 | <b>0.967</b> | <b>0.967</b> | 0.033        | 0.085        | <b>0.915</b> | --           | --           |
| Poire de Soveillame          | 14-003-1562 | Aclens       | 595 | G1 | <b>0.968</b> | G1.1 | <b>0.968</b> | <b>0.968</b> | 0.032        | <b>0.961</b> | 0.039        | --           | --           |
| Poire Vigneron               | 14-003-2539 | Aclens       | 596 | G2 | 0.589        | G2.2 | 0.589        | 0.411        | 0.589        | --           | --           | 0.463        | 0.537        |
| Duret                        | 14-003-177  | Pierre-à-bot | 597 | G2 | 0.751        | G2.2 | 0.792        | 0.249        | 0.751        | --           | --           | 0.208        | 0.792        |
| Poire Amboney                | 14-003-11   | Pierre-à-bot | 598 | G2 | 0.612        | G2.2 | 0.642        | 0.388        | 0.612        | --           | --           | 0.358        | 0.642        |
| Poire Bellosin               | 14-003-42   | Pierre-à-bot | 599 | G2 | 0.528        | G2.2 | 0.573        | 0.472        | 0.528        | --           | --           | 0.427        | 0.573        |
| Beurré superfin              | 14-003-1568 | Pierre-à-bot | 600 | G1 | 0.789        | G1.1 | <b>0.933</b> | 0.789        | 0.211        | <b>0.933</b> | 0.067        | --           | --           |
| Poire Biasson                | 14-003-56   | Pierre-à-bot | 601 | G1 | <b>0.838</b> | G1.2 | <b>0.889</b> | <b>0.838</b> | 0.162        | 0.111        | <b>0.889</b> | --           | --           |
| Poire Blanc                  | 14-003-61   | Pierre-à-bot | 602 | G1 | <b>0.862</b> | G1.2 | <b>0.951</b> | <b>0.862</b> | 0.138        | 0.049        | <b>0.951</b> | --           | --           |
| Poire Blesson Blanc du Versé | 14-003-64   | Pierre-à-bot | 603 | G2 | 0.583        | G2.2 | 0.799        | 0.417        | 0.583        | --           | --           | 0.201        | 0.799        |
| Poire Brunet                 | 14-003-87   | Pierre-à-bot | 604 | G2 | <b>0.927</b> | G2.1 | <b>0.932</b> | 0.073        | <b>0.927</b> | --           | --           | <b>0.932</b> | 0.068        |
| Poire Campanard              | 14-003-98   | Pierre-à-bot | 605 | G1 | 0.665        | G1.2 | <b>0.921</b> | 0.665        | 0.335        | 0.079        | <b>0.921</b> | --           | --           |
| Poire Canevet                | 14-003-100  | Pierre-à-bot | 606 | G1 | 0.596        | G1.2 | <b>0.908</b> | 0.596        | 0.404        | 0.092        | <b>0.908</b> | --           | --           |
| Poire Carmagnoule            | 14-003-104  | Pierre-à-bot | 607 | G1 | 0.702        | G1.2 | <b>0.857</b> | 0.702        | 0.298        | 0.143        | <b>0.857</b> | --           | --           |
| Poire Cent-Grappes blanc     | 14-003-107  | Pierre-à-bot | 608 | G2 | 0.697        | G2.2 | 0.697        | 0.303        | 0.697        | --           | --           | 0.453        | 0.547        |
| Charles Cognier              | 14-003-1556 | Pierre-à-bot | 609 | G1 | <b>0.960</b> | G1.1 | <b>0.960</b> | <b>0.960</b> | 0.040        | 0.587        | 0.413        | --           | --           |
| Poire Citron, Poire-         | 14-003-124  | Pierre-à-bot | 610 | G1 | <b>0.981</b> | G1.1 | <b>0.981</b> | <b>0.981</b> | 0.019        | <b>0.874</b> | 0.126        | --           | --           |
| Poire Clochette              | 14-003-128  | Pierre-à-bot | 611 | G2 | <b>0.974</b> | G2.1 | <b>0.974</b> | 0.026        | <b>0.974</b> | --           | --           | <b>0.921</b> | 0.079        |
| Poire Coquinet               | 14-003-1121 | Pierre-à-bot | 612 | G2 | 0.647        | G2.1 | 0.647        | 0.353        | 0.647        | --           | --           | 0.612        | 0.388        |
| Poire Coton                  | 14-003-142  | Pierre-à-bot | 613 | G1 | 0.628        | G1.2 | 0.702        | 0.628        | 0.372        | 0.298        | 0.702        | --           | --           |
| Poire Cuvette                | 14-003-156  | Pierre-à-bot | 614 | G1 | 0.546        | G1.2 | <b>0.830</b> | 0.546        | 0.454        | 0.170        | <b>0.830</b> | --           | --           |
| Poire Damette                | 14-003-157  | Pierre-à-bot | 615 | G2 | 0.526        | G2.2 | <b>0.824</b> | 0.474        | 0.526        | --           | --           | 0.176        | <b>0.824</b> |
| Poire Déba                   | 14-003-158  | Pierre-à-bot | 616 | G2 | <b>0.859</b> | G2.1 | <b>0.859</b> | 0.141        | <b>0.859</b> | --           | --           | 0.573        | 0.427        |
| Poire Dzojè                  | 14-003-178  | Pierre-à-bot | 617 | G2 | 0.740        | G2.1 | 0.768        | 0.260        | 0.740        | --           | --           | 0.768        | 0.232        |
| Poire Epi d'Hiver            | 14-003-186  | Pierre-à-bot | 618 | G1 | <b>0.828</b> | G1.1 | <b>0.828</b> | <b>0.828</b> | 0.172        | 0.516        | 0.484        | --           | --           |
| Poire Epine                  | 14-003-1123 | Pierre-à-bot | 619 | G1 | 0.638        | G1.2 | <b>0.981</b> | 0.638        | 0.362        | 0.019        | <b>0.981</b> | --           | --           |
| Poire de Fer                 | 14-003-1124 | Pierre-à-bot | 620 | G1 | 0.789        | G1.1 | 0.789        | 0.789        | 0.211        | 0.697        | 0.303        | --           | --           |
| Poire Froment                | 14-003-1125 | Pierre-à-bot | 621 | G2 | 0.575        | G2.2 | 0.775        | 0.425        | 0.575        | --           | --           | 0.225        | 0.775        |
| Poire Froment                | 14-003-1126 | Pierre-à-bot | 622 | G2 | 0.767        | G2.2 | 0.767        | 0.233        | 0.767        | --           | --           | 0.480        | 0.520        |
| Poire Goyard                 | 14-003-1128 | Pierre-à-bot | 623 | G2 | 0.641        | G2.2 | 0.733        | 0.359        | 0.641        | --           | --           | 0.267        | 0.733        |
| Poire Goyatson               | 14-003-258  | Pierre-à-bot | 624 | G2 | <b>0.818</b> | G2.1 | <b>0.818</b> | 0.182        | <b>0.818</b> | --           | --           | 0.556        | 0.444        |
| Poire Grachet                | 14-003-259  | Pierre-à-bot | 625 | G2 | <b>0.932</b> | G2.2 | <b>0.932</b> | 0.068        | <b>0.932</b> | --           | --           | 0.474        | 0.526        |
| Poire Guertelet              | 14-003-276  | Pierre-à-bot | 626 | G2 | 0.740        | G2.2 | <b>0.821</b> | 0.260        | 0.740        | --           | --           | 0.179        | <b>0.821</b> |
| Poire Guivertet              | 14-003-279  | Pierre-à-bot | 627 | G2 | <b>0.928</b> | G2.2 | <b>0.928</b> | 0.072        | <b>0.928</b> | --           | --           | 0.238        | 0.762        |
| Poire Madeleine              | 14-003-383  | Pierre-à-bot | 628 | G1 | <b>0.868</b> | G1.2 | <b>0.940</b> | <b>0.868</b> | 0.132        | 0.060        | <b>0.940</b> | --           | --           |
| Poire Malsalé                | 14-003-385  | Pierre-à-bot | 629 | G2 | <b>0.831</b> | G2.1 | <b>0.831</b> | 0.169        | <b>0.831</b> | --           | --           | 0.591        | 0.409        |
| Martinsec panaché            | 14-003-1569 | Pierre-à-bot | 630 | G1 | 0.653        | G1.2 | <b>0.882</b> | 0.653        | 0.347        | 0.118        | <b>0.882</b> | --           | --           |
| Poire à Miel                 | 14-003-404  | Pierre-à-bot | 631 | G1 | <b>0.937</b> | G1.2 | <b>0.979</b> | <b>0.937</b> | 0.063        | 0.021        | <b>0.979</b> | --           | --           |
| Poire Mocaté                 | 14-003-407  | Pierre-à-bot | 632 | G1 | 0.592        | G1.2 | <b>0.925</b> | 0.592        | 0.408        | 0.075        | <b>0.925</b> | --           | --           |
| Poire Mocatelet              | 14-003-408  | Pierre-à-bot | 633 | G2 | 0.739        | G2.1 | 0.739        | 0.261        | 0.739        | --           | --           | 0.566        | 0.434        |
| Orange                       | 14-003-2543 | Pierre-à-bot | 634 | G1 | <b>0.948</b> | G1.2 | <b>0.948</b> | <b>0.948</b> | 0.052        | 0.184        | <b>0.816</b> | --           | --           |
| Poire Orange                 | 14-003-439  | Pierre-à-bot | 635 | G1 | 0.789        | G1.2 | <b>0.949</b> | 0.789        | 0.211        | 0.051        | <b>0.949</b> | --           | --           |
| Poire Paremin                | 14-003-452  | Pierre-à-bot | 636 | G1 | 0.712        | G1.2 | <b>0.935</b> | 0.712        | 0.288        | 0.065        | <b>0.935</b> | --           | --           |
| Poire Pétoilin               | 14-003-2546 | Pierre-à-bot | 637 | G2 | 0.512        | G2.2 | <b>0.834</b> | 0.488        | 0.512        | --           | --           | 0.166        | <b>0.834</b> |
| Poire Petou                  | 14-003-460  | Pierre-à-bot | 638 | G2 | 0.642        | G2.1 | <b>0.820</b> | 0.358        | 0.642        | --           | --           | <b>0.820</b> | 0.180        |
| Poire Piasse                 | 14-003-462  | Pierre-à-bot | 639 | G1 | <b>0.923</b> | G1.2 | <b>0.954</b> | <b>0.923</b> | 0.077        | 0.046        | <b>0.954</b> | --           | --           |
| Poire Piàtè                  | 14-003-1162 | Pierre-à-bot | 640 | G1 | <b>0.867</b> | G1.2 | <b>0.965</b> | <b>0.867</b> | 0.133        | 0.035        | <b>0.965</b> | --           | --           |
| Poire Piéta                  | 14-003-466  | Pierre-à-bot | 641 | G1 | 0.510        | G1.2 | <b>0.821</b> | 0.510        | 0.490        | 0.179        | <b>0.821</b> | --           | --           |
| Poire Poiratte               | 14-003-470  | Pierre-à-bot | 642 | G1 | 0.733        | G1.2 | <b>0.959</b> | 0.733        | 0.267        | 0.041        | <b>0.959</b> | --           | --           |
| Poire à deux yeux            | 14-003-1543 | Pierre-à-bot | 643 | G1 | <b>0.912</b> | G1.2 | <b>0.974</b> | <b>0.912</b> | 0.088        | 0.026        | <b>0.974</b> | --           | --           |
| Poire Recan                  | 14-003-491  | Pierre-à-bot | 644 | G1 | 0.731        | G1.2 | <b>0.851</b> | 0.731        | 0.269        | 0.149        | <b>0.851</b> | --           | --           |
| Poire Rindai                 | 14-003-503  | Pierre-à-bot | 645 | G1 | 0.722        | G1.2 | <b>0.846</b> | 0.722        | 0.278        | 0.154        | <b>0.846</b> | --           | --           |
| Poire Rochet                 | 14-003-508  | Pierre-à-bot | 646 | G1 | <b>0.844</b> | G1.2 | <b>0.926</b> | <b>0.844</b> | 0.156        | 0.074        | <b>0.926</b> | --           | --           |
| Poire Ronda                  | 14-003-512  | Pierre-à-bot | 647 | G1 | <b>0.872</b> | G1.2 | <b>0.918</b> | <b>0.872</b> | 0.128        | 0.082        | <b>0.918</b> | --           | --           |
| Poire Rondi                  | 14-003-515  | Pierre-à-bot | 648 | G2 | <b>0.808</b> | G2.1 | <b>0.838</b> | 0.192        | <b>0.808</b> | --           | --           | <b>0.838</b> | 0.162        |
| Poire Rosalet                | 14-003-516  | Pierre-à-bot | 649 | G2 | 0.793        | G2.1 | 0.793        | 0.207        | 0.793        | --           | --           | 0.627        | 0.373        |
| Poire Rosselet               | 14-003-519  | Pierre-à-bot | 650 | G1 | <b>0.976</b> | G1.2 | <b>0.978</b> | <b>0.976</b> | 0.024        | 0.022        | <b>0.978</b> | --           | --           |
| Poire Rouge                  | 14-003-528  | Pierre-à-bot | 651 | G2 | 0.643        | G2.2 | 0.745        | 0.357        | 0.643        | --           | --           | 0.255        | 0.745        |
| Poire Roz                    | 14-003-533  | Pierre-à-bot | 652 | G2 | 0.764        | G2.1 | 0.764        | 0.236        | 0.764        | --           | --           | 0.682        | 0.318        |
| Poire de la Saint-Jean       | 14-003-542  | Pierre-à-bot | 653 | G1 | 0.764        | G1.2 | <b>0.956</b> | 0.764        | 0.236        | 0.044        | <b>0.956</b> | --           | --           |
| Poire St. Laurent            | 14-003-1542 | Pierre-à-bot | 654 | G2 | 0.577        | G2.1 | 0.577        | 0.423        | 0.577        | --           | --           | 0.501        | 0.499        |
| Poire Sâe                    | 14-003-541  | Pierre-à-bot | 655 | G2 | 0.758        | G2.2 | 0.758        | 0.242        | 0.758        | --           | --           | 0.417        | 0.583        |
| Poire Serpent                | 14-003-572  | Pierre-à-bot | 656 | G1 | 0.568        | G1.2 | <b>0.983</b> | 0.568        | 0.432        | 0.017        | <b>0.983</b> | --           | --           |
| Poire Sucelet                | 14-003-606  | Pierre-à-bot | 657 | G2 | 0.652        | G2.2 | <b>0.848</b> | 0.348        | 0.652        | --           | --           | 0.152        | <b>0.848</b> |
| Poire de Suisse              | 14-003-609  | Pierre-à-bot | 658 | G2 | 0.782        | G2.1 | 0.782        | 0.218        | 0.782        | --           | --           | 0.601        | 0.399        |
| Poire Tanti                  | 14-003-617  | Pierre-à-bot | 659 | G1 | <b>0.926</b> | G1.2 | <b>0.978</b> | <b>0.926</b> | 0.074        | 0.022        | <b>0.978</b> | --           | --           |
| Poire de Tcheneveuil         | 14-003-618  | Pierre-à-bot | 660 | G2 | <b>0.914</b> | G2.2 | <b>0.914</b> | 0.086        | <b>0.914</b> | --           | --           | 0.350        | 0.650        |
| Poire Vert-Sucré             | 14-003-644  | Pierre-à-bot | 661 | G1 | 0.713        | G1.2 | 0.713        | 0.713        | 0.287        | 0.383        | 0.617        | --           | --           |
| Poire de Vigne               | 14-003-646  | Pierre-à-bot | 662 | G1 | 0.575        | G1.2 | <b>0.947</b> | 0.575        | 0.425        | 0.053        | <b>0.947</b> | --           | --           |
| Poire Voidja                 | 14-003-649  | Pierre-à-bot | 663 | G1 | 0.709        | G1.2 | 0.709        | 0.709        | 0.291        | 0.446        | 0.554        | --           | --           |
| Poire Allemand               | 14-003-1188 | Pierre-à-bot | 664 | G2 | 0.572        | G2.1 | 0.751        | 0.428        | 0.572        | --           | --           | 0.751        | 0.249        |
| Poire Chevaux                | ?           | Pierre-à-bot | 665 | G1 | 0.587        | G1.2 | <b>0.968</b> | 0.587        | 0.413        | 0.032        | <b>0.968</b> | --           | --           |
| Culotte de Berger            | ?           | Pierre-à-bot | 666 | G1 | <b>0.957</b> | G1.1 | <b>0.961</b> | <b>0.957</b> | 0.043        | <b>0.961</b> | 0.039        | --           | --           |
| Poire Fricot                 | ?           | Pierre-à-bot | 667 | G2 | <b>0.902</b> | G2.2 | <b>0.902</b> | 0.098        | <b>0.902</b> | --           | --           | 0.173        | <b>0.827</b> |
| Rosellette                   | 14-003-1019 | Baden        | 668 | G1 | <b>0.966</b> | G1.1 | <b>0.966</b> | <b>0.966</b> | 0.034        | <b>0.882</b> | 0.118        | --           | --           |
| Champagner                   | 14-003-1035 | Baden        | 669 | G2 | 0.504        | G2.2 | 0.566        | 0.496        | 0.504        | --           | --           | 0.434        | 0.566        |
| Strubikner                   | 14-003-1041 | Baden        | 670 | G1 | <b>0.922</b> | G1.2 | <b>0.922</b> | <b>0.922</b> | 0.078        | 0.222        | 0.778        | --           | --           |

|                                       |             |       |     |    |       |      |       |       |       |       |       |       |       |
|---------------------------------------|-------------|-------|-----|----|-------|------|-------|-------|-------|-------|-------|-------|-------|
| unknown                               | 14-003-1050 | Baden | 671 | G1 | 0.977 | G1.2 | 0.977 | 0.977 | 0.023 | 0.319 | 0.681 | --    | --    |
| unknown                               | 14-003-1052 | Baden | 672 | G1 | 0.889 | G1.1 | 0.889 | 0.889 | 0.111 | 0.817 | 0.183 | --    | --    |
| Ackerbirne                            | 14-003-1054 | Baden | 673 | G2 | 0.958 | G2.2 | 0.958 | 0.042 | 0.958 | --    | --    | 0.480 | 0.520 |
| unknown                               | 14-003-1056 | Baden | 674 | G1 | 0.821 | G1.2 | 0.943 | 0.821 | 0.179 | 0.057 | 0.943 | --    | --    |
| Feigenbirne                           | 14-003-1058 | Baden | 675 | G2 | 0.822 | G2.2 | 0.822 | 0.178 | 0.822 | --    | --    | 0.227 | 0.773 |
| Grumbirne                             | 14-003-1062 | Baden | 676 | G2 | 0.531 | G2.2 | 0.596 | 0.469 | 0.531 | --    | --    | 0.404 | 0.596 |
| Zimmermann                            | 14-003-1067 | Baden | 677 | G1 | 0.956 | G1.2 | 0.956 | 0.956 | 0.044 | 0.103 | 0.897 | --    | --    |
| Zitronenbirne                         | 14-003-1071 | Baden | 678 | G2 | 0.533 | G2.1 | 0.830 | 0.467 | 0.533 | --    | --    | 0.830 | 0.170 |
| Stümppler                             | 14-003-1076 | Baden | 679 | G2 | 0.826 | G2.2 | 0.826 | 0.174 | 0.826 | --    | --    | 0.448 | 0.552 |
| unknown                               | 14-003-1077 | Baden | 680 | G1 | 0.724 | G1.2 | 0.926 | 0.724 | 0.276 | 0.074 | 0.926 | --    | --    |
| unknown                               | 14-003-1080 | Baden | 681 | G1 | 0.883 | G1.2 | 0.968 | 0.883 | 0.117 | 0.032 | 0.968 | --    | --    |
| Chilbi Birne                          | 14-003-1082 | Baden | 682 | G2 | 0.851 | G2.1 | 0.851 | 0.149 | 0.851 | --    | --    | 0.755 | 0.245 |
| unknown                               | 14-003-1084 | Baden | 683 | G1 | 0.871 | G1.2 | 0.871 | 0.871 | 0.129 | 0.331 | 0.669 | --    | --    |
| unknown                               | 14-003-1085 | Baden | 684 | G1 | 0.959 | G1.1 | 0.959 | 0.959 | 0.041 | 0.941 | 0.059 | --    | --    |
| unknown                               | 14-003-1088 | Baden | 685 | G2 | 0.590 | G2.2 | 0.910 | 0.410 | 0.590 | --    | --    | 0.090 | 0.910 |
| Santa Maria                           | 14-003-1042 | Baden | 686 | G1 | 0.622 | G1.1 | 0.622 | 0.622 | 0.378 | 0.618 | 0.382 | --    | --    |
| A cuire                               | 14-003-1555 | Baden | 687 | G2 | 0.803 | G2.2 | 0.803 | 0.197 | 0.803 | --    | --    | 0.478 | 0.522 |
| unknown / Louise bonne de la Tuilière | 14-003-1557 | Baden | 688 | G1 | 0.975 | G1.1 | 0.975 | 0.975 | 0.025 | 0.944 | 0.056 | --    | --    |
| Marion                                | 14-003-1574 | Baden | 689 | G2 | 0.639 | G2.1 | 0.832 | 0.361 | 0.639 | --    | --    | 0.832 | 0.168 |
| Rädler                                | 14-003-486  | Baden | 690 | G2 | 0.981 | G2.2 | 0.981 | 0.019 | 0.981 | --    | --    | 0.087 | 0.913 |
| Züccoh                                | 14-003-690  | Baden | 691 | G1 | 0.944 | G1.1 | 0.964 | 0.944 | 0.056 | 0.964 | 0.036 | --    | --    |
| Schneebirne                           | 14-003-1317 | Baden | 692 | G2 | 0.664 | G2.1 | 0.664 | 0.336 | 0.664 | --    | --    | 0.550 | 0.450 |
| unknown                               | 14-003-1094 | Baden | 693 | G1 | 0.951 | G1.1 | 0.951 | 0.951 | 0.049 | 0.757 | 0.243 | --    | --    |
| Gelbe Butterbirne                     | 14-003-1095 | Baden | 694 | G1 | 0.743 | G1.2 | 0.753 | 0.743 | 0.257 | 0.247 | 0.753 | --    | --    |
| unknown                               | 14-003-1347 | Baden | 695 | G2 | 0.939 | G2.2 | 0.939 | 0.061 | 0.939 | --    | --    | 0.220 | 0.780 |
| Keinerlei                             | 14-003-1365 | Baden | 696 | G2 | 0.934 | G2.2 | 0.934 | 0.066 | 0.934 | --    | --    | 0.117 | 0.883 |
| Wettinger                             | 14-003-1377 | Baden | 697 | G2 | 0.865 | G2.2 | 0.931 | 0.135 | 0.865 | --    | --    | 0.069 | 0.931 |
| Hängler                               | 14-003-295  | Baden | 698 | G2 | 0.913 | G2.1 | 0.913 | 0.087 | 0.913 | --    | --    | 0.589 | 0.411 |
| Stammbirne                            | 14-003-1444 | Baden | 699 | G2 | 0.966 | G2.2 | 0.966 | 0.034 | 0.966 | --    | --    | 0.240 | 0.760 |
| unknown                               | 14-003-1445 | Baden | 700 | G1 | 0.740 | G1.2 | 0.815 | 0.740 | 0.260 | 0.185 | 0.815 | --    | --    |
| Naghin's Butterbirne                  | 14-003-428  | Baden | 701 | G1 | 0.975 | G1.1 | 0.984 | 0.975 | 0.025 | 0.984 | 0.016 | --    | --    |
| Chriesbirne                           | 14-003-123  | Baden | 702 | G1 | 0.806 | G1.1 | 0.851 | 0.806 | 0.194 | 0.851 | 0.149 | --    | --    |
| Kugelbirne                            | 14-003-347  | Baden | 703 | G1 | 0.756 | G1.2 | 0.843 | 0.756 | 0.244 | 0.157 | 0.843 | --    | --    |
| Wilde Eierbirne                       | 14-003-669  | Baden | 704 | G2 | 0.977 | G2.1 | 0.977 | 0.023 | 0.977 | --    | --    | 0.723 | 0.277 |
| Dörrbirne                             | 14-003-529  | Baden | 705 | G2 | 0.715 | G2.1 | 0.810 | 0.285 | 0.715 | --    | --    | 0.810 | 0.190 |
| Sarganser Dörrbirne                   | 14-003-712  | Baden | 706 | G2 | 0.942 | G2.2 | 0.942 | 0.058 | 0.942 | --    | --    | 0.166 | 0.834 |
| unknown                               | 14-003-693  | Baden | 707 | G2 | 0.892 | G2.2 | 0.892 | 0.108 | 0.892 | --    | --    | 0.250 | 0.750 |
| Sternenbirne                          | 14-003-700  | Baden | 708 | G2 | 0.949 | G2.2 | 0.949 | 0.051 | 0.949 | --    | --    | 0.429 | 0.571 |
| Miltbirne                             | 14-003-707  | Baden | 709 | G2 | 0.972 | G2.1 | 0.972 | 0.028 | 0.972 | --    | --    | 0.733 | 0.267 |
| Sölibirne                             | 14-003-1489 | Baden | 710 | G1 | 0.618 | G1.2 | 0.618 | 0.618 | 0.382 | 0.482 | 0.518 | --    | --    |
| Grosse Weissbirne                     | 14-003-702  | Baden | 711 | G2 | 0.922 | G2.2 | 0.922 | 0.078 | 0.922 | --    | --    | 0.397 | 0.603 |
| Biomättler                            | 14-003-1490 | Baden | 712 | G2 | 0.966 | G2.2 | 0.966 | 0.034 | 0.966 | --    | --    | 0.323 | 0.677 |
| Heubirli                              | 14-003-1399 | Baden | 713 | G2 | 0.904 | G2.2 | 0.904 | 0.096 | 0.904 | --    | --    | 0.341 | 0.659 |
| Aenisbirne                            | 14-003-1400 | Baden | 714 | G1 | 0.800 | G1.2 | 0.912 | 0.800 | 0.200 | 0.088 | 0.912 | --    | --    |
| Thurgauer Weinbirne                   | 14-003-742  | Baden | 715 | G2 | 0.945 | G2.1 | 0.945 | 0.055 | 0.945 | --    | --    | 0.643 | 0.357 |
| Togge                                 | 14-003-743  | Baden | 716 | G1 | 0.682 | G1.2 | 0.877 | 0.682 | 0.318 | 0.123 | 0.877 | --    | --    |
| Rotlängele                            | 14-003-1456 | Baden | 717 | G1 | 0.942 | G1.1 | 0.942 | 0.942 | 0.058 | 0.828 | 0.172 | --    | --    |
| Ottenbacher Schellerbirne             | 14-003-1083 | Baden | 718 | G1 | 0.816 | G1.2 | 0.816 | 0.816 | 0.184 | 0.192 | 0.808 | --    | --    |
| unknown                               | 14-003-1448 | Büren | 719 | G1 | 0.908 | G1.1 | 0.918 | 0.908 | 0.092 | 0.918 | 0.082 | --    | --    |
| Thorbirne                             | 14-003-764  | Büren | 720 | G2 | 0.972 | G2.2 | 0.972 | 0.028 | 0.972 | --    | --    | 0.498 | 0.502 |
| Sommerblutbirne                       | 14-003-728  | Büren | 721 | G2 | 0.756 | G2.1 | 0.815 | 0.244 | 0.756 | --    | --    | 0.815 | 0.185 |
| Rheinlangäla                          | 14-003-759  | Büren | 722 | G1 | 0.734 | G1.2 | 0.734 | 0.734 | 0.266 | 0.319 | 0.681 | --    | --    |
| unknown                               | 14-003-936  | Büren | 723 | G1 | 0.851 | G1.2 | 0.902 | 0.851 | 0.149 | 0.098 | 0.902 | --    | --    |
| Honigbirne                            | 14-003-829  | Büren | 724 | G2 | 0.971 | G2.2 | 0.971 | 0.029 | 0.971 | --    | --    | 0.361 | 0.639 |
| unknown                               | 14-003-1314 | Büren | 725 | G1 | 0.970 | G1.1 | 0.970 | 0.970 | 0.030 | 0.926 | 0.074 | --    | --    |
| Gelbbirne                             | 14-003-974  | Büren | 726 | G2 | 0.960 | G2.2 | 0.960 | 0.040 | 0.960 | --    | --    | 0.103 | 0.897 |
| unknown                               | 14-003-1072 | Büren | 727 | G2 | 0.834 | G2.2 | 0.844 | 0.166 | 0.834 | --    | --    | 0.156 | 0.844 |
| unknown                               | 14-003-1027 | Büren | 728 | G1 | 0.950 | G1.1 | 0.950 | 0.950 | 0.050 | 0.936 | 0.064 | --    | --    |
| Glockenbirne                          | 14-003-1026 | Büren | 729 | G2 | 0.811 | G2.2 | 0.811 | 0.189 | 0.811 | --    | --    | 0.361 | 0.639 |
| Heuerbirli                            | 14-003-994  | Büren | 730 | G1 | 0.740 | G1.2 | 0.988 | 0.740 | 0.260 | 0.012 | 0.988 | --    | --    |
| Heilämpen                             | 14-003-985  | Büren | 731 | G2 | 0.650 | G2.1 | 0.842 | 0.350 | 0.650 | --    | --    | 0.842 | 0.158 |
| unknown                               | 14-003-925  | Büren | 732 | G2 | 0.977 | G2.2 | 0.977 | 0.023 | 0.977 | --    | --    | 0.353 | 0.647 |
| Waldershüsler                         | 14-003-923  | Büren | 733 | G2 | 0.904 | G2.2 | 0.904 | 0.096 | 0.904 | --    | --    | 0.368 | 0.632 |
| Speierling                            | 14-003-920  | Büren | 734 | G2 | 0.899 | G2.2 | 0.911 | 0.101 | 0.899 | --    | --    | 0.089 | 0.911 |
| Häfelä                                | 14-003-990  | Büren | 735 | G2 | 0.943 | G2.2 | 0.943 | 0.057 | 0.943 | --    | --    | 0.295 | 0.705 |
| Merzelambirnen                        | 14-003-949  | Büren | 736 | G2 | 0.943 | G2.2 | 0.943 | 0.057 | 0.943 | --    | --    | 0.422 | 0.578 |
| Heulämpen                             | 14-003-305  | Büren | 737 | G2 | 0.966 | G2.1 | 0.966 | 0.034 | 0.966 | --    | --    | 0.850 | 0.150 |
| Hagenwiler                            | 14-003-883  | Büren | 738 | G2 | 0.971 | G2.2 | 0.971 | 0.029 | 0.971 | --    | --    | 0.201 | 0.799 |
| unknown                               | 14-003-1478 | Büren | 739 | G2 | 0.945 | G2.2 | 0.945 | 0.055 | 0.945 | --    | --    | 0.311 | 0.689 |
| Lehmbirne                             | 14-003-976  | Büren | 740 | G2 | 0.699 | G2.2 | 0.699 | 0.301 | 0.699 | --    | --    | 0.387 | 0.613 |
| Teerbirnen                            | 14-003-821  | Büren | 741 | G2 | 0.974 | G2.1 | 0.974 | 0.026 | 0.974 | --    | --    | 0.647 | 0.353 |
| Zitronenbirne                         | 14-003-964  | Büren | 742 | G1 | 0.832 | G1.2 | 0.905 | 0.832 | 0.168 | 0.095 | 0.905 | --    | --    |
| unknown                               | 14-003-1005 | Büren | 743 | G2 | 0.904 | G2.2 | 0.904 | 0.096 | 0.904 | --    | --    | 0.392 | 0.608 |
| Steinbirli                            | 14-003-1002 | Büren | 744 | G2 | 0.973 | G2.2 | 0.973 | 0.027 | 0.973 | --    | --    | 0.268 | 0.732 |
| Tiroler Spitzbirne                    | 14-003-807  | Büren | 745 | G1 | 0.523 | G1.2 | 0.781 | 0.523 | 0.477 | 0.219 | 0.781 | --    | --    |
| Butterbirne                           | 14-003-822  | Büren | 746 | G1 | 0.978 | G1.1 | 0.978 | 0.978 | 0.022 | 0.973 | 0.027 | --    | --    |
| Eierbirne                             | 14-003-795  | Büren | 747 | G2 | 0.970 | G2.2 | 0.970 | 0.030 | 0.970 | --    | --    | 0.125 | 0.875 |
| Herrenbirne                           | 14-003-799  | Büren | 748 | G2 | 0.958 | G2.1 | 0.958 | 0.042 | 0.958 | --    | --    | 0.733 | 0.267 |
| unknown                               | 14-003-1435 | Büren | 749 | G1 | 0.956 | G1.1 | 0.956 | 0.956 | 0.044 | 0.890 | 0.110 | --    | --    |
| Brünnlerbirne                         | 14-003-863  | Büren | 750 | G2 | 0.977 | G2.2 | 0.977 | 0.023 | 0.977 | --    | --    | 0.250 | 0.750 |
| Schwizer Birne                        | 14-003-1486 | Büren | 751 | G2 | 0.973 | G2.2 | 0.973 | 0.027 | 0.973 | --    | --    | 0.427 | 0.573 |
| Rosaletenbirne                        | 14-003-895  | Büren | 752 | G1 | 0.963 | G1.2 | 0.974 | 0.963 | 0.037 | 0.026 | 0.974 | --    | --    |
| unknown                               | 14-003-711  | Büren | 753 | G2 | 0.971 | G2.1 | 0.971 | 0.029 | 0.971 | --    | --    | 0.756 | 0.244 |
| Rosaletli                             | 14-003-966  | Büren | 754 | G1 | 0.939 | G1.2 | 0.939 | 0.939 | 0.061 | 0.204 | 0.796 | --    | --    |
| Hühnerbeere                           | 14-003-953  | Büren | 755 | G2 | 0.869 | G2.2 | 0.869 | 0.131 | 0.869 | --    | --    | 0.274 | 0.726 |
| unknown                               | 14-003-1010 | Büren | 756 | G1 | 0.747 | G1.1 | 0.747 | 0.747 | 0.253 | 0.521 | 0.479 | --    | --    |
| Eierbirne                             | 14-003-996  | Büren | 757 | G2 | 0.868 | G2.1 | 0.922 | 0.132 | 0.868 | --    | --    | 0.922 | 0.078 |



|                         |             |                    |     |    |       |      |       |       |       |       |       |       |       |
|-------------------------|-------------|--------------------|-----|----|-------|------|-------|-------|-------|-------|-------|-------|-------|
| unknown                 | 14-003-1488 | Büron              | 758 | G1 | 0.940 | G1.2 | 0.940 | 0.940 | 0.060 | 0.356 | 0.644 | --    | --    |
| Chärbeli                | 14-003-1000 | Büron              | 759 | G2 | 0.948 | G2.1 | 0.948 | 0.052 | 0.948 | --    | --    | 0.820 | 0.180 |
| Wiedlibiere             | 14-003-957  | Büron              | 760 | G2 | 0.832 | G2.2 | 0.926 | 0.168 | 0.832 | --    | --    | 0.074 | 0.926 |
| Winterisler             | 14-003-1417 | Büron              | 761 | G2 | 0.808 | G2.2 | 0.808 | 0.192 | 0.808 | --    | --    | 0.447 | 0.553 |
| Frauenbirne             | 14-003-1389 | Büron              | 762 | G2 | 0.919 | G2.2 | 0.919 | 0.081 | 0.919 | --    | --    | 0.191 | 0.809 |
| Kugelbirne              | 14-003-1416 | Büron              | 763 | G2 | 0.813 | G2.2 | 0.813 | 0.187 | 0.813 | --    | --    | 0.232 | 0.768 |
| unknown                 | 14-003-1476 | Büron              | 764 | G1 | 0.530 | G1.2 | 0.972 | 0.530 | 0.470 | 0.028 | 0.972 | --    | --    |
| Butterbirne             | 14-003-969  | Büron              | 765 | G1 | 0.940 | G1.1 | 0.940 | 0.940 | 0.060 | 0.861 | 0.139 | --    | --    |
| Hougräbler              | 14-003-1414 | Büron              | 766 | G2 | 0.961 | G2.1 | 0.961 | 0.039 | 0.961 | --    | --    | 0.758 | 0.242 |
| Schiblerbirli           | 14-003-945  | Büron              | 767 | G2 | 0.621 | G2.2 | 0.801 | 0.379 | 0.621 | --    | --    | 0.199 | 0.801 |
| Wolfertswiler Blutbirne | 14-003-854  | Büron              | 768 | G1 | 0.756 | G1.2 | 0.958 | 0.756 | 0.244 | 0.042 | 0.958 | --    | --    |
| Schnittholzbirne        | 14-003-847  | Büron              | 769 | G2 | 0.965 | G2.2 | 0.965 | 0.035 | 0.965 | --    | --    | 0.255 | 0.745 |
| Gemstler                | 14-003-1044 | Büron              | 770 | G2 | 0.933 | G2.2 | 0.933 | 0.067 | 0.933 | --    | --    | 0.188 | 0.812 |
| unknown                 | 14-003-1483 | Büron              | 771 | G1 | 0.900 | G1.1 | 0.967 | 0.900 | 0.100 | 0.967 | 0.033 | --    | --    |
| Bettagsbirne            | 14-003-911  | Büron              | 772 | G2 | 0.974 | G2.1 | 0.974 | 0.026 | 0.974 | --    | --    | 0.555 | 0.445 |
| Süsse Theilersbirne     | 14-003-620  | Büron              | 773 | G2 | 0.615 | G2.2 | 0.615 | 0.385 | 0.615 | --    | --    | 0.432 | 0.568 |
| Biessenhofer Birne      | 14-003-887  | Büron              | 774 | G2 | 0.731 | G2.2 | 0.799 | 0.269 | 0.731 | --    | --    | 0.201 | 0.799 |
| Rütibirne               | 14-003-867  | Büron              | 775 | G1 | 0.974 | G1.2 | 0.974 | 0.974 | 0.026 | 0.404 | 0.596 | --    | --    |
| unknown                 | 14-003-740  | Büron              | 776 | G1 | 0.611 | G1.1 | 0.855 | 0.611 | 0.389 | 0.855 | 0.145 | --    | --    |
| Rötelibirne             | 14-003-1009 | Büron              | 777 | G2 | 0.852 | G2.2 | 0.852 | 0.148 | 0.852 | --    | --    | 0.340 | 0.660 |
| Martinsbirne            | 14-003-1007 | Büron              | 778 | G2 | 0.966 | G2.2 | 0.966 | 0.034 | 0.966 | --    | --    | 0.198 | 0.802 |
| Feigenbirne             | 14-003-793  | Büron              | 779 | G2 | 0.830 | G2.2 | 0.830 | 0.170 | 0.830 | --    | --    | 0.302 | 0.698 |
| Eierbirne               | 14-003-833  | Büron              | 780 | G1 | 0.559 | G1.1 | 0.816 | 0.559 | 0.441 | 0.816 | 0.184 | --    | --    |
| Butterbirne             | 14-003-872  | Büron              | 781 | G1 | 0.926 | G1.1 | 0.969 | 0.926 | 0.074 | 0.969 | 0.031 | --    | --    |
| Gelbbirne               | 14-003-816  | Büron              | 782 | G1 | 0.612 | G1.2 | 0.754 | 0.612 | 0.388 | 0.246 | 0.754 | --    | --    |
| unknown                 | 14-003-1455 | Büron              | 783 | G2 | 0.924 | G2.2 | 0.924 | 0.076 | 0.924 | --    | --    | 0.078 | 0.922 |
| Butterbirne             | 14-003-783  | Büron              | 784 | G1 | 0.923 | G1.1 | 0.923 | 0.923 | 0.077 | 0.785 | 0.215 | --    | --    |
| Brunnenbirne            | 14-003-88   | Büron              | 785 | G2 | 0.967 | G2.1 | 0.967 | 0.033 | 0.967 | --    | --    | 0.567 | 0.433 |
| Rostizer                | 14-003-820  | Büron              | 786 | G2 | 0.604 | G2.2 | 0.604 | 0.396 | 0.604 | --    | --    | 0.470 | 0.530 |
| Tessiner Birli          | 14-003-825  | Büron              | 787 | G1 | 0.544 | G1.1 | 0.720 | 0.544 | 0.456 | 0.720 | 0.280 | --    | --    |
| Zitronenbirne           | 14-003-903  | Büron              | 788 | G1 | 0.778 | G1.2 | 0.968 | 0.778 | 0.222 | 0.032 | 0.968 | --    | --    |
| Grüne Sommermagdalene   | 14-003-902  | Büron              | 789 | G2 | 0.922 | G2.2 | 0.922 | 0.078 | 0.922 | --    | --    | 0.428 | 0.572 |
| unknown                 | 14-003-934  | Büron              | 790 | G1 | 0.963 | G1.1 | 0.963 | 0.963 | 0.037 | 0.959 | 0.041 | --    | --    |
| Thurgauerbirne          | 14-003-849  | Büron              | 791 | G2 | 0.955 | G2.1 | 0.955 | 0.045 | 0.955 | --    | --    | 0.568 | 0.432 |
| Schutzenbirne           | 14-003-778  | Büron              | 792 | G2 | 0.984 | G2.1 | 0.984 | 0.016 | 0.984 | --    | --    | 0.694 | 0.306 |
| Gascholere              | 14-003-845  | Büron              | 793 | G2 | 0.969 | G2.1 | 0.969 | 0.031 | 0.969 | --    | --    | 0.801 | 0.199 |
| Ankenbirne              | 14-003-1378 | Büron              | 794 | G2 | 0.714 | G2.2 | 0.714 | 0.286 | 0.714 | --    | --    | 0.443 | 0.557 |
| unknown                 | 14-003-1372 | Büron              | 795 | G2 | 0.975 | G2.2 | 0.975 | 0.025 | 0.975 | --    | --    | 0.098 | 0.902 |
| Trybelbirne             | 14-003-1330 | Büron              | 796 | G2 | 0.979 | G2.2 | 0.979 | 0.021 | 0.979 | --    | --    | 0.154 | 0.846 |
| unknown                 | 14-003-1428 | Büron              | 797 | G1 | 0.546 | G1.1 | 0.568 | 0.546 | 0.454 | 0.568 | 0.432 | --    | --    |
| Petersbirne             | 14-003-737  | Büron              | 798 | G2 | 0.891 | G2.1 | 0.917 | 0.109 | 0.891 | --    | --    | 0.917 | 0.083 |
| Frühhüngälä             | 14-003-701  | Büron              | 799 | G2 | 0.813 | G2.2 | 0.827 | 0.187 | 0.813 | --    | --    | 0.173 | 0.827 |
| Bambirli                | 14-003-979  | Büron              | 800 | G2 | 0.977 | G2.2 | 0.977 | 0.023 | 0.977 | --    | --    | 0.127 | 0.873 |
| unknown                 | 14-003-1518 | Büron              | 801 | G1 | 0.982 | G1.1 | 0.982 | 0.982 | 0.018 | 0.977 | 0.023 | --    | --    |
| Rollibirne              | 14-003-980  | Büron              | 802 | G2 | 0.962 | G2.1 | 0.962 | 0.038 | 0.962 | --    | --    | 0.826 | 0.174 |
| Rosalette               | 14-003-992  | Büron              | 803 | G1 | 0.965 | G1.2 | 0.981 | 0.965 | 0.035 | 0.019 | 0.981 | --    | --    |
| Heubirne                | 14-003-858  | Büron              | 804 | G1 | 0.963 | G1.1 | 0.963 | 0.963 | 0.037 | 0.949 | 0.051 | --    | --    |
| Fischbächler            | 14-003-1074 | Büron              | 805 | G2 | 0.886 | G2.2 | 0.886 | 0.114 | 0.886 | --    | --    | 0.138 | 0.862 |
| unknown                 | 14-003-1472 | Büron              | 806 | G2 | 0.976 | G2.2 | 0.976 | 0.024 | 0.976 | --    | --    | 0.241 | 0.759 |
| unknown                 | 14-003-1533 | Büron              | 807 | G1 | 0.962 | G1.1 | 0.962 | 0.962 | 0.038 | 0.936 | 0.064 | --    | --    |
| Ernbirne                | 14-003-2568 | Büron              | 808 | G1 | 0.611 | G1.2 | 0.960 | 0.611 | 0.389 | 0.040 | 0.960 | --    | --    |
| Gägubirli               | 14-003-1515 | Büron              | 809 | G1 | 0.530 | G1.2 | 0.834 | 0.530 | 0.470 | 0.166 | 0.834 | --    | --    |
| unknown                 | 14-003-1538 | Büron              | 810 | G2 | 0.945 | G2.2 | 0.945 | 0.055 | 0.945 | --    | --    | 0.492 | 0.508 |
| Zuckerbirne             | 14-003-998  | Büron              | 811 | G2 | 0.756 | G2.1 | 0.756 | 0.244 | 0.756 | --    | --    | 0.523 | 0.477 |
| unknown                 | 14-003-1328 | Büron              | 812 | G2 | 0.753 | G2.1 | 0.846 | 0.247 | 0.753 | --    | --    | 0.846 | 0.154 |
| Kalchbühler             | 14-003-327  | Büron              | 813 | G2 | 0.939 | G2.2 | 0.939 | 0.061 | 0.939 | --    | --    | 0.169 | 0.831 |
| Tschupubirli            | 14-003-1231 | Büron              | 814 | G2 | 0.669 | G2.2 | 0.669 | 0.331 | 0.669 | --    | --    | 0.375 | 0.625 |
| Hämpelibire             | 14-003-1215 | Büron              | 815 | G2 | 0.878 | G2.1 | 0.878 | 0.122 | 0.878 | --    | --    | 0.702 | 0.298 |
| unknown                 | 14-003-1532 | Büron              | 816 | G2 | 0.510 | G2.1 | 0.577 | 0.490 | 0.510 | --    | --    | 0.577 | 0.423 |
| Spalierbirne            | 14-003-1046 | Büron              | 817 | G1 | 0.894 | G1.1 | 0.894 | 0.894 | 0.106 | 0.877 | 0.123 | --    | --    |
| unknown                 | 14-003-1225 | Büron              | 818 | G1 | 0.541 | G1.2 | 0.883 | 0.541 | 0.459 | 0.117 | 0.883 | --    | --    |
| Doyenné d'hiver         | 14-003-1528 | Büron              | 819 | G1 | 0.954 | G1.1 | 0.954 | 0.954 | 0.046 | 0.907 | 0.093 | --    | --    |
| Schweizer Heubirne      | 14-003-566  | Dürrenäsch         | 820 | G2 | 0.738 | G2.2 | 0.906 | 0.262 | 0.738 | --    | --    | 0.094 | 0.906 |
| Bühlbirne               | 14-003-90   | Dürrenäsch         | 821 | G2 | 0.947 | G2.2 | 0.947 | 0.053 | 0.947 | --    | --    | 0.055 | 0.945 |
| Mockenholzbirne         | 14-003-409  | Knonau             | 822 | G2 | 0.943 | G2.1 | 0.943 | 0.057 | 0.943 | --    | --    | 0.576 | 0.424 |
| Rotholzbirne            | 14-003-525  | Knonau             | 823 | G2 | 0.980 | G2.2 | 0.980 | 0.020 | 0.980 | --    | --    | 0.221 | 0.779 |
| Rosalettibirne          | 14-003-517  | Knonau             | 824 | G1 | 0.962 | G1.1 | 0.962 | 0.962 | 0.038 | 0.917 | 0.083 | --    | --    |
| Kalberrädler            | 14-003-326  | Knonau             | 825 | G2 | 0.735 | G2.2 | 0.735 | 0.265 | 0.735 | --    | --    | 0.378 | 0.622 |
| Entenbirne              | 14-003-185  | Knonau             | 826 | G2 | 0.978 | G2.1 | 0.978 | 0.022 | 0.978 | --    | --    | 0.933 | 0.067 |
| Berner Dornbirne        | 14-003-48   | Knonau             | 827 | G2 | 0.966 | G2.2 | 0.966 | 0.034 | 0.966 | --    | --    | 0.080 | 0.920 |
| Le Lectier              | 14-003-362  | Knonau             | 828 | G1 | 0.949 | G1.1 | 0.949 | 0.949 | 0.051 | 0.804 | 0.196 | --    | --    |
| Poire Steinmüribirne    | 14-003-594  | Schaffhausen       | 829 | G2 | 0.918 | G2.1 | 0.918 | 0.082 | 0.918 | --    | --    | 0.761 | 0.239 |
| Poire Steinmüribirne    | 14-003-594  | Schaffhausen       | 829 | G2 | 0.918 | G2.1 | 0.918 | 0.082 | 0.918 | --    | --    | 0.761 | 0.239 |
| Hosui                   | Reference 5 | Uni Reading        | 830 | G2 | 0.803 | G2.2 | 0.803 | 0.197 | 0.803 | --    | --    | 0.367 | 0.633 |
| Sülibirne               | 14-003-611  | Bözberg-Vierlinden | 831 | G2 | 0.906 | G2.2 | 0.906 | 0.094 | 0.906 | --    | --    | 0.291 | 0.709 |
| Abbe Fetel              | Reference 1 | Uni Reading        | 832 | G1 | 0.977 | G1.1 | 0.977 | 0.977 | 0.023 | 0.976 | 0.024 | --    | --    |
| Chanticleer             | Reference 2 | Uni Reading        | 833 | G1 | 0.826 | G1.2 | 0.843 | 0.826 | 0.174 | 0.157 | 0.843 | --    | --    |
| Passe Crassane          | Reference 6 | Uni Reading        | 834 | G1 | 0.984 | G1.1 | 0.984 | 0.984 | 0.016 | 0.975 | 0.025 | --    | --    |
| Pendula                 | Reference 7 | Uni Reading        | 835 | G2 | 0.590 | G2.2 | 0.837 | 0.410 | 0.590 | --    | --    | 0.163 | 0.837 |
| Wasserbirne             | 14-003-653  | Höri               | 837 | G2 | 0.530 | G2.2 | 0.814 | 0.470 | 0.530 | --    | --    | 0.186 | 0.814 |
| Mockenholzbirne         | 14-003-409  | Höri               | 838 | G2 | 0.898 | G2.2 | 0.898 | 0.102 | 0.898 | --    | --    | 0.104 | 0.896 |
| Birne Unterlage M       | rootstock M | Höri               | 839 | G2 | 0.966 | G2.1 | 0.966 | 0.034 | 0.966 | --    | --    | 0.850 | 0.150 |
| unknown                 | -           | privat             | 840 | G2 | 0.942 | G2.1 | 0.942 | 0.058 | 0.942 | --    | --    | 0.873 | 0.127 |
